# Supplementary material for: Lay Conceptions of Happiness: Associations With Reported Well-Being, Personality Traits, and Materialism
Source: PubMed Central journal article supplement (PMC6813919; doi:10.3389/fpsyg.2019.02377), 2019-10-18
Supplement: Data_Sheet_2.pdf [file Data_Sheet_2.pdf]

```

REGRESSION
/MISSING LISTWISE
/STATISTICS COEFF OUTS CI(95) R ANOVA COLLIN TOL ZPP
/CRITERIA=PIN(.05) POUT(.10)
/NOORIGIN
/DEPENDENT social_well_being
/METHOD=ENTER eudaimonism inclusive externality fear transformative fragi
lity valuing
inflexibility.

```

## Regression

### Notes

|                        |                                                                                                                                                                                                                                                                                                         |                                                                                      |
|------------------------|---------------------------------------------------------------------------------------------------------------------------------------------------------------------------------------------------------------------------------------------------------------------------------------------------------|--------------------------------------------------------------------------------------|
| Output Created         |                                                                                                                                                                                                                                                                                                         | 20-MAY-2019 12:20:00                                                                 |
| Comments               |                                                                                                                                                                                                                                                                                                         |                                                                                      |
| Input                  | Data                                                                                                                                                                                                                                                                                                    | C:\Users\1\Desktop\korea<br>cnada study\merge korea<br>canada\final.sav              |
|                        | Active Dataset                                                                                                                                                                                                                                                                                          | DataSet1                                                                             |
|                        | Filter                                                                                                                                                                                                                                                                                                  | <none>                                                                               |
|                        | Weight                                                                                                                                                                                                                                                                                                  | <none>                                                                               |
|                        | Split File                                                                                                                                                                                                                                                                                              | Nation                                                                               |
|                        | N of Rows in Working Data<br>File                                                                                                                                                                                                                                                                       | 1837                                                                                 |
| Missing Value Handling | Definition of Missing                                                                                                                                                                                                                                                                                   | User-defined missing<br>values are treated as<br>missing.                            |
|                        | Cases Used                                                                                                                                                                                                                                                                                              | Statistics are based on<br>cases with no missing<br>values for any variable<br>used. |
| Syntax                 | REGRESSION<br>/MISSING LISTWISE<br>/STATISTICS COEFF<br>OUTS CI(95) R ANOVA<br>COLLIN TOL ZPP<br>/CRITERIA=PIN(.05)<br>POUT(.10)<br>/NOORIGIN<br>/DEPENDENT<br>social_well_being<br>/METHOD=ENTER<br>eudaimonism inclusive<br>externality fear<br>transformative fragility<br>valuing<br>inflexibility. |                                                                                      |

### Notes

|           |                                               |             |
|-----------|-----------------------------------------------|-------------|
| Resources | Processor Time                                | 00:00:00.05 |
|           | Elapsed Time                                  | 00:00:00.19 |
|           | Memory Required                               | 13728 bytes |
|           | Additional Memory Required for Residual Plots | 0 bytes     |

### Variables Entered/Removed<sup>a</sup>

| Nation | Model | Variables Entered                                                                                         | Variables Removed | Method |
|--------|-------|-----------------------------------------------------------------------------------------------------------|-------------------|--------|
| Korea  | 1     | inflexibility, transformative, eudaimonism, inclusive, valuing, fragility, externality, fear <sup>b</sup> | .                 | Enter  |
| Canada | 1     | inflexibility, transformative, eudaimonism, inclusive, fragility, valuing, fear, externality <sup>b</sup> | .                 | Enter  |

a. Dependent Variable: social\_well\_being

b. All requested variables entered.

### Model Summary

| Nation | Model | R                 | R Square | Adjusted R Square | Std. Error of the Estimate |
|--------|-------|-------------------|----------|-------------------|----------------------------|
| Korea  | 1     | .399 <sup>a</sup> | .159     | .153              | .87196                     |
| Canada | 1     | .422 <sup>b</sup> | .178     | .168              | 1.04754                    |

a. Predictors: (Constant), inflexibility, transformative, eudaimonism, inclusive, valuing, fragility, externality, fear

b. Predictors: (Constant), inflexibility, transformative, eudaimonism, inclusive, fragility, valuing, fear, externality

### ANOVA<sup>a</sup>

| Nation | Model |            | Sum of Squares | df   | Mean Square | F      | Sig.              |
|--------|-------|------------|----------------|------|-------------|--------|-------------------|
| Korea  | 1     | Regression | 167.862        | 8    | 20.983      | 27.597 | .000 <sup>b</sup> |
|        |       | Residual   | 888.046        | 1168 | .760        |        |                   |
|        |       | Total      | 1055.907       | 1176 |             |        |                   |
| Canada | 1     | Regression | 154.979        | 8    | 19.372      | 17.654 | .000 <sup>c</sup> |
|        |       | Residual   | 714.372        | 651  | 1.097       |        |                   |
|        |       | Total      | 869.352        | 659  |             |        |                   |

a. Dependent Variable: social\_well\_being

b. Predictors: (Constant), inflexibility, transformative, eudaimonism, inclusive, valuing, fragility, externality, fear

c. Predictors: (Constant), inflexibility, transformative, eudaimonism, inclusive, fragility, valuing, fear, externality

### Coefficients<sup>a</sup>

| Nation | Model |                | Unstandardized Coefficients |            | Standardized Coefficients | t      |
|--------|-------|----------------|-----------------------------|------------|---------------------------|--------|
|        |       |                | B                           | Std. Error | Beta                      |        |
| Korea  | 1     | (Constant)     | 1.420                       | .230       |                           | 6.174  |
|        |       | eudaimonism    | .012                        | .005       | .068                      | 2.490  |
|        |       | inclusive      | .202                        | .023       | .240                      | 8.658  |
|        |       | externality    | -.115                       | .029       | -.129                     | -3.979 |
|        |       | fear           | -.084                       | .029       | -.095                     | -2.932 |
|        |       | transformative | .097                        | .026       | .116                      | 3.774  |
|        |       | fragility      | -.137                       | .026       | -.153                     | -5.303 |
|        |       | valuing        | .078                        | .038       | .059                      | 2.024  |
|        |       | inflexibility  | -.016                       | .025       | -.018                     | -.624  |
| Canada | 1     | (Constant)     | 1.397                       | .277       |                           | 5.038  |
|        |       | eudaimonism    | .028                        | .008       | .131                      | 3.594  |
|        |       | inclusive      | .136                        | .032       | .156                      | 4.189  |
|        |       | externality    | -.069                       | .042       | -.080                     | -1.661 |
|        |       | fear           | -.203                       | .039       | -.246                     | -5.259 |
|        |       | transformative | .070                        | .035       | .077                      | 1.993  |
|        |       | fragility      | -.129                       | .036       | -.146                     | -3.589 |
|        |       | valuing        | .018                        | .048       | .016                      | .377   |
|        |       | inflexibility  | .116                        | .037       | .126                      | 3.112  |

### Coefficients<sup>a</sup>

| Nation | Model |                | Sig. | 95.0% Confidence Interval for B |             | Correlations |
|--------|-------|----------------|------|---------------------------------|-------------|--------------|
|        |       |                |      | Lower Bound                     | Upper Bound | Zero-order   |
| Korea  | 1     | (Constant)     | .000 | .968                            | 1.871       |              |
|        |       | eudaimonism    | .013 | .003                            | .022        | .121         |
|        |       | inclusive      | .000 | .156                            | .248        | .296         |
|        |       | externality    | .000 | -.172                           | -.058       | -.211        |
|        |       | fear           | .003 | -.140                           | -.028       | -.135        |
|        |       | transformative | .000 | .046                            | .147        | .103         |
|        |       | fragility      | .000 | -.187                           | -.086       | -.170        |
|        |       | valuing        | .043 | .002                            | .153        | -.002        |
|        |       | inflexibility  | .533 | -.066                           | .034        | -.083        |
| Canada | 1     | (Constant)     | .000 | .853                            | 1.942       |              |
|        |       | eudaimonism    | .000 | .013                            | .043        | .176         |
|        |       | inclusive      | .000 | .072                            | .200        | .202         |
|        |       | externality    | .097 | -.151                           | .013        | -.214        |
|        |       | fear           | .000 | -.279                           | -.127       | -.288        |
|        |       | transformative | .047 | .001                            | .138        | .009         |
|        |       | fragility      | .000 | -.199                           | -.058       | -.249        |
|        |       | valuing        | .706 | -.077                           | .113        | -.104        |
|        |       | inflexibility  | .002 | .043                            | .189        | .003         |

### Coefficients<sup>a</sup>

| Nation | Model |                | Correlations |       | Collinearity Statistics |       |
|--------|-------|----------------|--------------|-------|-------------------------|-------|
|        |       |                | Partial      | Part  | Tolerance               | VIF   |
| Korea  | 1     | (Constant)     |              |       |                         |       |
|        |       | eudaimonism    | .073         | .067  | .953                    | 1.050 |
|        |       | inclusive      | .246         | .232  | .935                    | 1.069 |
|        |       | externality    | -.116        | -.107 | .682                    | 1.467 |
|        |       | fear           | -.085        | -.079 | .679                    | 1.473 |
|        |       | transformative | .110         | .101  | .761                    | 1.314 |
|        |       | fragility      | -.153        | -.142 | .864                    | 1.158 |
|        |       | valuing        | .059         | .054  | .862                    | 1.161 |
|        |       | inflexibility  | -.018        | -.017 | .878                    | 1.138 |
| Canada | 1     | (Constant)     |              |       |                         |       |
|        |       | eudaimonism    | .139         | .128  | .951                    | 1.051 |
|        |       | inclusive      | .162         | .149  | .908                    | 1.101 |
|        |       | externality    | -.065        | -.059 | .548                    | 1.826 |
|        |       | fear           | -.202        | -.187 | .575                    | 1.738 |
|        |       | transformative | .078         | .071  | .845                    | 1.183 |
|        |       | fragility      | -.139        | -.128 | .767                    | 1.304 |
|        |       | valuing        | .015         | .013  | .733                    | 1.364 |
|        |       | inflexibility  | .121         | .111  | .764                    | 1.309 |

a. Dependent Variable: social\_well\_being

### Collinearity Diagnostics<sup>a</sup>

| Nation | Model | Dimension | Eigenvalue | Condition Index | Variance Proportions |             |
|--------|-------|-----------|------------|-----------------|----------------------|-------------|
|        |       |           |            |                 | (Constant)           | eudaimonism |
| Korea  | 1     | 1         | 8.436      | 1.000           | .00                  | .00         |
|        |       | 2         | .167       | 7.107           | .00                  | .12         |
|        |       | 3         | .106       | 8.931           | .00                  | .48         |
|        |       | 4         | .092       | 9.578           | .00                  | .04         |
|        |       | 5         | .074       | 10.661          | .00                  | .25         |
|        |       | 6         | .053       | 12.604          | .00                  | .00         |
|        |       | 7         | .038       | 14.840          | .01                  | .01         |
|        |       | 8         | .025       | 18.508          | .04                  | .02         |
|        |       | 9         | .009       | 30.399          | .94                  | .09         |
| Canada | 1     | 1         | 8.212      | 1.000           | .00                  | .00         |
|        |       | 2         | .264       | 5.575           | .00                  | .06         |
|        |       | 3         | .145       | 7.533           | .00                  | .02         |
|        |       | 4         | .110       | 8.658           | .00                  | .21         |
|        |       | 5         | .086       | 9.784           | .00                  | .18         |
|        |       | 6         | .074       | 10.530          | .00                  | .32         |
|        |       | 7         | .055       | 12.213          | .01                  | .00         |
|        |       | 8         | .037       | 14.804          | .01                  | .01         |
|        |       | 9         | .017       | 21.985          | .96                  | .21         |

## Collinearity Diagnostics<sup>a</sup>

| Nation | Model | Dimension | Variance Proportions |             |      |                |           |
|--------|-------|-----------|----------------------|-------------|------|----------------|-----------|
|        |       |           | inclusive            | externality | fear | transformative | fragility |
| Korea  | 1     | 1         | .00                  | .00         | .00  | .00            | .00       |
|        |       | 2         | .23                  | .11         | .10  | .00            | .00       |
|        |       | 3         | .46                  | .01         | .01  | .01            | .00       |
|        |       | 4         | .05                  | .05         | .41  | .10            | .00       |
|        |       | 5         | .15                  | .15         | .10  | .18            | .10       |
|        |       | 6         | .00                  | .34         | .15  | .00            | .09       |
|        |       | 7         | .00                  | .31         | .21  | .71            | .18       |
|        |       | 8         | .07                  | .02         | .00  | .00            | .52       |
|        |       | 9         | .03                  | .00         | .01  | .00            | .11       |
| Canada | 1     | 1         | .00                  | .00         | .00  | .00            | .00       |
|        |       | 2         | .08                  | .06         | .19  | .01            | .00       |
|        |       | 3         | .11                  | .01         | .12  | .06            | .03       |
|        |       | 4         | .61                  | .00         | .10  | .00            | .00       |
|        |       | 5         | .01                  | .24         | .45  | .00            | .10       |
|        |       | 6         | .05                  | .28         | .01  | .33            | .03       |
|        |       | 7         | .00                  | .39         | .08  | .56            | .21       |
|        |       | 8         | .13                  | .02         | .00  | .00            | .48       |
|        |       | 9         | .01                  | .01         | .05  | .03            | .14       |

## Collinearity Diagnostics<sup>a</sup>

| Nation | Model | Dimension | Variance Proportions |               |
|--------|-------|-----------|----------------------|---------------|
|        |       |           | valuing              | inflexibility |
| Korea  | 1     | 1         | .00                  | .00           |
|        |       | 2         | .00                  | .01           |
|        |       | 3         | .00                  | .02           |
|        |       | 4         | .00                  | .17           |
|        |       | 5         | .01                  | .01           |
|        |       | 6         | .01                  | .62           |
|        |       | 7         | .02                  | .01           |
|        |       | 8         | .41                  | .09           |
|        |       | 9         | .54                  | .07           |
| Canada | 1     | 1         | .00                  | .00           |
|        |       | 2         | .00                  | .03           |
|        |       | 3         | .00                  | .45           |
|        |       | 4         | .00                  | .12           |
|        |       | 5         | .04                  | .08           |
|        |       | 6         | .00                  | .21           |
|        |       | 7         | .06                  | .01           |
|        |       | 8         | .60                  | .01           |
|        |       | 9         | .30                  | .09           |

a. Dependent Variable: social\_well\_being

```

REGRESSION
  /MISSING LISTWISE
  /STATISTICS COEFF OUTS CI(95) R ANOVA COLLIN TOL ZPP
  /CRITERIA=PIN(.05) POUT(.10)
  /NOORIGIN
  /DEPENDENT psychological_well_being
  /METHOD=ENTER eudaimonism inclusive externality fear transformative fragi
lity valuing
    inflexibility.

```

## Regression



## Notes

|                        |                                                  |                                                                                                                                                                                                                                                                                                                |
|------------------------|--------------------------------------------------|----------------------------------------------------------------------------------------------------------------------------------------------------------------------------------------------------------------------------------------------------------------------------------------------------------------|
| Output Created         |                                                  | 20-MAY-2019 12:20:08                                                                                                                                                                                                                                                                                           |
| Comments               |                                                  |                                                                                                                                                                                                                                                                                                                |
| Input                  | Data                                             | C:\Users\1\Desktop\korea<br>cnada study\merge korea<br>canada\final.sav                                                                                                                                                                                                                                        |
|                        | Active Dataset                                   | DataSet1                                                                                                                                                                                                                                                                                                       |
|                        | Filter                                           | <none>                                                                                                                                                                                                                                                                                                         |
|                        | Weight                                           | <none>                                                                                                                                                                                                                                                                                                         |
|                        | Split File                                       | Nation                                                                                                                                                                                                                                                                                                         |
|                        | N of Rows in Working Data<br>File                | 1837                                                                                                                                                                                                                                                                                                           |
| Missing Value Handling | Definition of Missing                            | User-defined missing<br>values are treated as<br>missing.                                                                                                                                                                                                                                                      |
|                        | Cases Used                                       | Statistics are based on<br>cases with no missing<br>values for any variable<br>used.                                                                                                                                                                                                                           |
| Syntax                 |                                                  | REGRESSION<br>/MISSING LISTWISE<br>/STATISTICS COEFF<br>OUTS CI(95) R ANOVA<br>COLLIN TOL ZPP<br>/CRITERIA=PIN(.05)<br>POUT(.10)<br>/NOORIGIN<br>/DEPENDENT<br>psychological_well_being<br>/METHOD=ENTER<br>eudaimonism inclusive<br>externality fear<br>transformative fragility<br>valuing<br>inflexibility. |
| Resources              | Processor Time                                   | 00:00:00.03                                                                                                                                                                                                                                                                                                    |
|                        | Elapsed Time                                     | 00:00:00.04                                                                                                                                                                                                                                                                                                    |
|                        | Memory Required                                  | 13728 bytes                                                                                                                                                                                                                                                                                                    |
|                        | Additional Memory<br>Required for Residual Plots | 0 bytes                                                                                                                                                                                                                                                                                                        |

### Variables Entered/Removed<sup>a</sup>

| Nation | Model | Variables Entered                                                                                         | Variables Removed | Method |
|--------|-------|-----------------------------------------------------------------------------------------------------------|-------------------|--------|
| Korea  | 1     | inflexibility, transformative, eudaimonism, inclusive, valuing, fragility, externality, fear <sup>b</sup> | .                 | Enter  |
| Canada | 1     | inflexibility, transformative, eudaimonism, inclusive, fragility, valuing, fear, externality <sup>b</sup> | .                 | Enter  |

a. Dependent Variable: psychological\_well\_being

b. All requested variables entered.

### Model Summary

| Nation | Model | R                 | R Square | Adjusted R Square | Std. Error of the Estimate |
|--------|-------|-------------------|----------|-------------------|----------------------------|
| Korea  | 1     | .424 <sup>a</sup> | .180     | .174              | .94339                     |
| Canada | 1     | .459 <sup>b</sup> | .210     | .201              | 1.13078                    |

a. Predictors: (Constant), inflexibility, transformative, eudaimonism, inclusive, valuing, fragility, externality, fear

b. Predictors: (Constant), inflexibility, transformative, eudaimonism, inclusive, fragility, valuing, fear, externality

### ANOVA<sup>a</sup>

| Nation | Model |            | Sum of Squares | df   | Mean Square | F      | Sig.              |
|--------|-------|------------|----------------|------|-------------|--------|-------------------|
| Korea  | 1     | Regression | 228.060        | 8    | 28.507      | 32.032 | .000 <sup>b</sup> |
|        |       | Residual   | 1039.498       | 1168 | .890        |        |                   |
|        |       | Total      | 1267.558       | 1176 |             |        |                   |
| Canada | 1     | Regression | 221.756        | 8    | 27.720      | 21.678 | .000 <sup>c</sup> |
|        |       | Residual   | 832.413        | 651  | 1.279       |        |                   |
|        |       | Total      | 1054.169       | 659  |             |        |                   |

a. Dependent Variable: psychological\_well\_being

b. Predictors: (Constant), inflexibility, transformative, eudaimonism, inclusive, valuing, fragility, externality, fear

c. Predictors: (Constant), inflexibility, transformative, eudaimonism, inclusive, fragility, valuing, fear, externality

### Coefficients<sup>a</sup>

| Nation | Model |                | Unstandardized Coefficients |            | Standardized Coefficients | t      |
|--------|-------|----------------|-----------------------------|------------|---------------------------|--------|
|        |       |                | B                           | Std. Error | Beta                      |        |
| Korea  | 1     | (Constant)     | 1.947                       | .249       |                           | 7.826  |
|        |       | eudaimonism    | .015                        | .005       | .077                      | 2.847  |
|        |       | inclusive      | .162                        | .025       | .176                      | 6.405  |
|        |       | externality    | -.162                       | .031       | -.166                     | -5.176 |
|        |       | fear           | -.175                       | .031       | -.182                     | -5.649 |
|        |       | transformative | .141                        | .028       | .155                      | 5.105  |
|        |       | fragility      | -.152                       | .028       | -.156                     | -5.464 |
|        |       | valuing        | .143                        | .041       | .098                      | 3.441  |
|        |       | inflexibility  | -5.964E-5                   | .027       | .000                      | -.002  |
| Canada | 1     | (Constant)     | 2.989                       | .299       |                           | 9.984  |
|        |       | eudaimonism    | .017                        | .008       | .074                      | 2.072  |
|        |       | inclusive      | .172                        | .035       | .180                      | 4.915  |
|        |       | externality    | -.126                       | .045       | -.132                     | -2.800 |
|        |       | fear           | -.244                       | .042       | -.268                     | -5.843 |
|        |       | transformative | .084                        | .038       | .085                      | 2.240  |
|        |       | fragility      | -.082                       | .039       | -.084                     | -2.106 |
|        |       | valuing        | -.080                       | .052       | -.062                     | -1.523 |
|        |       | inflexibility  | .062                        | .040       | .062                      | 1.550  |

### Coefficients<sup>a</sup>

| Nation | Model |                | Sig. | 95.0% Confidence Interval for B |             | Correlations |
|--------|-------|----------------|------|---------------------------------|-------------|--------------|
|        |       |                |      | Lower Bound                     | Upper Bound | Zero-order   |
| Korea  | 1     | (Constant)     | .000 | 1.459                           | 2.435       |              |
|        |       | eudaimonism    | .004 | .005                            | .026        | .125         |
|        |       | inclusive      | .000 | .112                            | .211        | .244         |
|        |       | externality    | .000 | -.223                           | -.101       | -.265        |
|        |       | fear           | .000 | -.236                           | -.114       | -.211        |
|        |       | transformative | .000 | .087                            | .196        | .110         |
|        |       | fragility      | .000 | -.207                           | -.098       | -.174        |
|        |       | valuing        | .001 | .061                            | .224        | .009         |
|        |       | inflexibility  | .998 | -.054                           | .054        | -.088        |
| Canada | 1     | (Constant)     | .000 | 2.401                           | 3.577       |              |
|        |       | eudaimonism    | .039 | .001                            | .034        | .138         |
|        |       | inclusive      | .000 | .103                            | .241        | .197         |
|        |       | externality    | .005 | -.214                           | -.038       | -.311        |
|        |       | fear           | .000 | -.325                           | -.162       | -.363        |
|        |       | transformative | .025 | .010                            | .158        | .007         |
|        |       | fragility      | .036 | -.158                           | -.006       | -.237        |
|        |       | valuing        | .128 | -.182                           | .023        | -.192        |
|        |       | inflexibility  | .122 | -.017                           | .141        | -.096        |

### Coefficients<sup>a</sup>

| Nation | Model |                | Correlations |       | Collinearity Statistics |       |
|--------|-------|----------------|--------------|-------|-------------------------|-------|
|        |       |                | Partial      | Part  | Tolerance               | VIF   |
| Korea  | 1     | (Constant)     |              |       |                         |       |
|        |       | eudaimonism    | .083         | .075  | .953                    | 1.050 |
|        |       | inclusive      | .184         | .170  | .935                    | 1.069 |
|        |       | externality    | -.150        | -.137 | .682                    | 1.467 |
|        |       | fear           | -.163        | -.150 | .679                    | 1.473 |
|        |       | transformative | .148         | .135  | .761                    | 1.314 |
|        |       | fragility      | -.158        | -.145 | .864                    | 1.158 |
|        |       | valuing        | .100         | .091  | .862                    | 1.161 |
|        |       | inflexibility  | .000         | .000  | .878                    | 1.138 |
| Canada | 1     | (Constant)     |              |       |                         |       |
|        |       | eudaimonism    | .081         | .072  | .951                    | 1.051 |
|        |       | inclusive      | .189         | .171  | .908                    | 1.101 |
|        |       | externality    | -.109        | -.098 | .548                    | 1.826 |
|        |       | fear           | -.223        | -.203 | .575                    | 1.738 |
|        |       | transformative | .087         | .078  | .845                    | 1.183 |
|        |       | fragility      | -.082        | -.073 | .767                    | 1.304 |
|        |       | valuing        | -.060        | -.053 | .733                    | 1.364 |
|        |       | inflexibility  | .061         | .054  | .764                    | 1.309 |

a. Dependent Variable: psychological\_well\_being

### Collinearity Diagnostics<sup>a</sup>

| Nation | Model | Dimension | Eigenvalue | Condition Index | Variance Proportions |             |
|--------|-------|-----------|------------|-----------------|----------------------|-------------|
|        |       |           |            |                 | (Constant)           | eudaimonism |
| Korea  | 1     | 1         | 8.436      | 1.000           | .00                  | .00         |
|        |       | 2         | .167       | 7.107           | .00                  | .12         |
|        |       | 3         | .106       | 8.931           | .00                  | .48         |
|        |       | 4         | .092       | 9.578           | .00                  | .04         |
|        |       | 5         | .074       | 10.661          | .00                  | .25         |
|        |       | 6         | .053       | 12.604          | .00                  | .00         |
|        |       | 7         | .038       | 14.840          | .01                  | .01         |
|        |       | 8         | .025       | 18.508          | .04                  | .02         |
|        |       | 9         | .009       | 30.399          | .94                  | .09         |
| Canada | 1     | 1         | 8.212      | 1.000           | .00                  | .00         |
|        |       | 2         | .264       | 5.575           | .00                  | .06         |
|        |       | 3         | .145       | 7.533           | .00                  | .02         |
|        |       | 4         | .110       | 8.658           | .00                  | .21         |
|        |       | 5         | .086       | 9.784           | .00                  | .18         |
|        |       | 6         | .074       | 10.530          | .00                  | .32         |
|        |       | 7         | .055       | 12.213          | .01                  | .00         |
|        |       | 8         | .037       | 14.804          | .01                  | .01         |
|        |       | 9         | .017       | 21.985          | .96                  | .21         |

### Collinearity Diagnostics<sup>a</sup>

| Nation | Model | Dimension | Variance Proportions |             |      |                |           |
|--------|-------|-----------|----------------------|-------------|------|----------------|-----------|
|        |       |           | inclusive            | externality | fear | transformative | fragility |
| Korea  | 1     | 1         | .00                  | .00         | .00  | .00            | .00       |
|        |       | 2         | .23                  | .11         | .10  | .00            | .00       |
|        |       | 3         | .46                  | .01         | .01  | .01            | .00       |
|        |       | 4         | .05                  | .05         | .41  | .10            | .00       |
|        |       | 5         | .15                  | .15         | .10  | .18            | .10       |
|        |       | 6         | .00                  | .34         | .15  | .00            | .09       |
|        |       | 7         | .00                  | .31         | .21  | .71            | .18       |
|        |       | 8         | .07                  | .02         | .00  | .00            | .52       |
|        |       | 9         | .03                  | .00         | .01  | .00            | .11       |
| Canada | 1     | 1         | .00                  | .00         | .00  | .00            | .00       |
|        |       | 2         | .08                  | .06         | .19  | .01            | .00       |
|        |       | 3         | .11                  | .01         | .12  | .06            | .03       |
|        |       | 4         | .61                  | .00         | .10  | .00            | .00       |
|        |       | 5         | .01                  | .24         | .45  | .00            | .10       |
|        |       | 6         | .05                  | .28         | .01  | .33            | .03       |
|        |       | 7         | .00                  | .39         | .08  | .56            | .21       |
|        |       | 8         | .13                  | .02         | .00  | .00            | .48       |
|        |       | 9         | .01                  | .01         | .05  | .03            | .14       |

## Collinearity Diagnostics<sup>a</sup>

| Nation | Model | Dimension | Variance Proportions |               |
|--------|-------|-----------|----------------------|---------------|
|        |       |           | valuing              | inflexibility |
| Korea  | 1     | 1         | .00                  | .00           |
|        |       | 2         | .00                  | .01           |
|        |       | 3         | .00                  | .02           |
|        |       | 4         | .00                  | .17           |
|        |       | 5         | .01                  | .01           |
|        |       | 6         | .01                  | .62           |
|        |       | 7         | .02                  | .01           |
|        |       | 8         | .41                  | .09           |
|        |       | 9         | .54                  | .07           |
| Canada | 1     | 1         | .00                  | .00           |
|        |       | 2         | .00                  | .03           |
|        |       | 3         | .00                  | .45           |
|        |       | 4         | .00                  | .12           |
|        |       | 5         | .04                  | .08           |
|        |       | 6         | .00                  | .21           |
|        |       | 7         | .06                  | .01           |
|        |       | 8         | .60                  | .01           |
|        |       | 9         | .30                  | .09           |

a. Dependent Variable: psychological\_well\_being

```

REGRESSION
  /MISSING LISTWISE
  /STATISTICS COEFF OUTS CI(95) R ANOVA COLLIN TOL ZPP
  /CRITERIA=PIN(.05) POUT(.10)
  /NOORIGIN
  /DEPENDENT life_satisfaction
  /METHOD=ENTER eudaimonism inclusive externality fear transformative fragi
lity valuing
  inflexibility.

```

## Regression



## Notes

|                        |                                               |                                                                                                                                                                                                                                                                         |
|------------------------|-----------------------------------------------|-------------------------------------------------------------------------------------------------------------------------------------------------------------------------------------------------------------------------------------------------------------------------|
| Output Created         |                                               | 20-MAY-2019 12:20:15                                                                                                                                                                                                                                                    |
| Comments               |                                               |                                                                                                                                                                                                                                                                         |
| Input                  | Data                                          | C:\Users\1\Desktop\korea cnada study\merge korea canada\final.sav                                                                                                                                                                                                       |
|                        | Active Dataset                                | DataSet1                                                                                                                                                                                                                                                                |
|                        | Filter                                        | <none>                                                                                                                                                                                                                                                                  |
|                        | Weight                                        | <none>                                                                                                                                                                                                                                                                  |
|                        | Split File                                    | Nation                                                                                                                                                                                                                                                                  |
|                        | N of Rows in Working Data File                | 1837                                                                                                                                                                                                                                                                    |
| Missing Value Handling | Definition of Missing                         | User-defined missing values are treated as missing.                                                                                                                                                                                                                     |
|                        | Cases Used                                    | Statistics are based on cases with no missing values for any variable used.                                                                                                                                                                                             |
| Syntax                 |                                               | <pre> REGRESSION /MISSING LISTWISE /STATISTICS COEFF OUTS CI(95) R ANOVA COLLIN TOL ZPP /CRITERIA=PIN(.05) POUT(.10) /NOORIGIN /DEPENDENT life_satisfaction /METHOD=ENTER eudaimonism inclusive externality fear transformative fragility valuing inflexibility. </pre> |
| Resources              | Processor Time                                | 00:00:00.03                                                                                                                                                                                                                                                             |
|                        | Elapsed Time                                  | 00:00:00.04                                                                                                                                                                                                                                                             |
|                        | Memory Required                               | 13728 bytes                                                                                                                                                                                                                                                             |
|                        | Additional Memory Required for Residual Plots | 0 bytes                                                                                                                                                                                                                                                                 |

### Variables Entered/Removed<sup>a</sup>

| Nation | Model | Variables Entered                                                                                         | Variables Removed | Method |
|--------|-------|-----------------------------------------------------------------------------------------------------------|-------------------|--------|
| Korea  | 1     | inflexibility, transformative, eudaimonism, inclusive, valuing, fragility, externality, fear <sup>b</sup> | .                 | Enter  |
| Canada | 1     | inflexibility, transformative, eudaimonism, inclusive, fragility, valuing, fear, externality <sup>b</sup> | .                 | Enter  |

a. Dependent Variable: life\_satisfaction

b. All requested variables entered.

### Model Summary

| Nation | Model | R                 | R Square | Adjusted R Square | Std. Error of the Estimate |
|--------|-------|-------------------|----------|-------------------|----------------------------|
| Korea  | 1     | .423 <sup>a</sup> | .179     | .173              | 1.24190                    |
| Canada | 1     | .491 <sup>b</sup> | .241     | .231              | 1.36261                    |

a. Predictors: (Constant), inflexibility, transformative, eudaimonism, inclusive, valuing, fragility, externality, fear

b. Predictors: (Constant), inflexibility, transformative, eudaimonism, inclusive, fragility, valuing, fear, externality

### ANOVA<sup>a</sup>

| Nation | Model |            | Sum of Squares | df   | Mean Square | F      | Sig.              |
|--------|-------|------------|----------------|------|-------------|--------|-------------------|
| Korea  | 1     | Regression | 391.542        | 8    | 48.943      | 31.733 | .000 <sup>b</sup> |
|        |       | Residual   | 1801.418       | 1168 | 1.542       |        |                   |
|        |       | Total      | 2192.960       | 1176 |             |        |                   |
| Canada | 1     | Regression | 383.053        | 8    | 47.882      | 25.789 | .000 <sup>c</sup> |
|        |       | Residual   | 1208.713       | 651  | 1.857       |        |                   |
|        |       | Total      | 1591.766       | 659  |             |        |                   |

a. Dependent Variable: life\_satisfaction

b. Predictors: (Constant), inflexibility, transformative, eudaimonism, inclusive, valuing, fragility, externality, fear

c. Predictors: (Constant), inflexibility, transformative, eudaimonism, inclusive, fragility, valuing, fear, externality

### Coefficients<sup>a</sup>

| Nation | Model |                | Unstandardized Coefficients |            | Standardized Coefficients | t      |
|--------|-------|----------------|-----------------------------|------------|---------------------------|--------|
|        |       |                | B                           | Std. Error | Beta                      |        |
| Korea  | 1     | (Constant)     | 5.046                       | .327       |                           | 15.408 |
|        |       | eudaimonism    | -.010                       | .007       | -.039                     | -1.445 |
|        |       | inclusive      | .200                        | .033       | .165                      | 6.014  |
|        |       | externality    | -.251                       | .041       | -.196                     | -6.090 |
|        |       | fear           | -.167                       | .041       | -.132                     | -4.087 |
|        |       | transformative | .197                        | .036       | .164                      | 5.400  |
|        |       | fragility      | -.239                       | .037       | -.185                     | -6.501 |
|        |       | valuing        | -.095                       | .055       | -.050                     | -1.739 |
|        |       | inflexibility  | .052                        | .036       | .041                      | 1.446  |
| Canada | 1     | (Constant)     | 5.027                       | .361       |                           | 13.935 |
|        |       | eudaimonism    | -.012                       | .010       | -.043                     | -1.239 |
|        |       | inclusive      | .192                        | .042       | .163                      | 4.552  |
|        |       | externality    | -.201                       | .054       | -.171                     | -3.711 |
|        |       | fear           | -.321                       | .050       | -.288                     | -6.394 |
|        |       | transformative | .130                        | .045       | .106                      | 2.853  |
|        |       | fragility      | -.136                       | .047       | -.114                     | -2.920 |
|        |       | valuing        | -.143                       | .063       | -.091                     | -2.274 |
|        |       | inflexibility  | .209                        | .048       | .169                      | 4.325  |

### Coefficients<sup>a</sup>

| Nation | Model |                | Sig. | 95.0% Confidence Interval for B |             | Correlations<br>Zero-order |
|--------|-------|----------------|------|---------------------------------|-------------|----------------------------|
|        |       |                |      | Lower Bound                     | Upper Bound |                            |
| Korea  | 1     | (Constant)     | .000 | 4.403                           | 5.688       |                            |
|        |       | eudaimonism    | .149 | -.024                           | .004        | .017                       |
|        |       | inclusive      | .000 | .135                            | .265        | .218                       |
|        |       | externality    | .000 | -.332                           | -.170       | -.293                      |
|        |       | fear           | .000 | -.247                           | -.087       | -.214                      |
|        |       | transformative | .000 | .125                            | .268        | .080                       |
|        |       | fragility      | .000 | -.311                           | -.167       | -.220                      |
|        |       | valuing        | .082 | -.202                           | .012        | -.127                      |
|        |       | inflexibility  | .148 | -.019                           | .123        | -.057                      |
| Canada | 1     | (Constant)     | .000 | 4.319                           | 5.736       |                            |
|        |       | eudaimonism    | .216 | -.032                           | .007        | .023                       |
|        |       | inclusive      | .000 | .109                            | .275        | .178                       |
|        |       | externality    | .000 | -.307                           | -.095       | -.322                      |
|        |       | fear           | .000 | -.420                           | -.223       | -.377                      |
|        |       | transformative | .004 | .040                            | .219        | -.014                      |
|        |       | fragility      | .004 | -.228                           | -.045       | -.278                      |
|        |       | valuing        | .023 | -.267                           | -.020       | -.225                      |
|        |       | inflexibility  | .000 | .114                            | .304        | -.011                      |

### Coefficients<sup>a</sup>

| Nation | Model |                | Correlations |       | Collinearity Statistics |       |
|--------|-------|----------------|--------------|-------|-------------------------|-------|
|        |       |                | Partial      | Part  | Tolerance               | VIF   |
| Korea  | 1     | (Constant)     |              |       |                         |       |
|        |       | eudaimonism    | -.042        | -.038 | .953                    | 1.050 |
|        |       | inclusive      | .173         | .160  | .935                    | 1.069 |
|        |       | externality    | -.175        | -.161 | .682                    | 1.467 |
|        |       | fear           | -.119        | -.108 | .679                    | 1.473 |
|        |       | transformative | .156         | .143  | .761                    | 1.314 |
|        |       | fragility      | -.187        | -.172 | .864                    | 1.158 |
|        |       | valuing        | -.051        | -.046 | .862                    | 1.161 |
|        |       | inflexibility  | .042         | .038  | .878                    | 1.138 |
| Canada | 1     | (Constant)     |              |       |                         |       |
|        |       | eudaimonism    | -.048        | -.042 | .951                    | 1.051 |
|        |       | inclusive      | .176         | .155  | .908                    | 1.101 |
|        |       | externality    | -.144        | -.127 | .548                    | 1.826 |
|        |       | fear           | -.243        | -.218 | .575                    | 1.738 |
|        |       | transformative | .111         | .097  | .845                    | 1.183 |
|        |       | fragility      | -.114        | -.100 | .767                    | 1.304 |
|        |       | valuing        | -.089        | -.078 | .733                    | 1.364 |
|        |       | inflexibility  | .167         | .148  | .764                    | 1.309 |

a. Dependent Variable: life\_satisfaction

### Collinearity Diagnostics<sup>a</sup>

| Nation | Model | Dimension | Eigenvalue | Condition Index | Variance Proportions |             |
|--------|-------|-----------|------------|-----------------|----------------------|-------------|
|        |       |           |            |                 | (Constant)           | eudaimonism |
| Korea  | 1     | 1         | 8.436      | 1.000           | .00                  | .00         |
|        |       | 2         | .167       | 7.107           | .00                  | .12         |
|        |       | 3         | .106       | 8.931           | .00                  | .48         |
|        |       | 4         | .092       | 9.578           | .00                  | .04         |
|        |       | 5         | .074       | 10.661          | .00                  | .25         |
|        |       | 6         | .053       | 12.604          | .00                  | .00         |
|        |       | 7         | .038       | 14.840          | .01                  | .01         |
|        |       | 8         | .025       | 18.508          | .04                  | .02         |
|        |       | 9         | .009       | 30.399          | .94                  | .09         |
| Canada | 1     | 1         | 8.212      | 1.000           | .00                  | .00         |
|        |       | 2         | .264       | 5.575           | .00                  | .06         |
|        |       | 3         | .145       | 7.533           | .00                  | .02         |
|        |       | 4         | .110       | 8.658           | .00                  | .21         |
|        |       | 5         | .086       | 9.784           | .00                  | .18         |
|        |       | 6         | .074       | 10.530          | .00                  | .32         |
|        |       | 7         | .055       | 12.213          | .01                  | .00         |
|        |       | 8         | .037       | 14.804          | .01                  | .01         |
|        |       | 9         | .017       | 21.985          | .96                  | .21         |

## Collinearity Diagnostics<sup>a</sup>

| Nation | Model | Dimension | Variance Proportions |             |      |                |           |
|--------|-------|-----------|----------------------|-------------|------|----------------|-----------|
|        |       |           | inclusive            | externality | fear | transformative | fragility |
| Korea  | 1     | 1         | .00                  | .00         | .00  | .00            | .00       |
|        |       | 2         | .23                  | .11         | .10  | .00            | .00       |
|        |       | 3         | .46                  | .01         | .01  | .01            | .00       |
|        |       | 4         | .05                  | .05         | .41  | .10            | .00       |
|        |       | 5         | .15                  | .15         | .10  | .18            | .10       |
|        |       | 6         | .00                  | .34         | .15  | .00            | .09       |
|        |       | 7         | .00                  | .31         | .21  | .71            | .18       |
|        |       | 8         | .07                  | .02         | .00  | .00            | .52       |
|        |       | 9         | .03                  | .00         | .01  | .00            | .11       |
| Canada | 1     | 1         | .00                  | .00         | .00  | .00            | .00       |
|        |       | 2         | .08                  | .06         | .19  | .01            | .00       |
|        |       | 3         | .11                  | .01         | .12  | .06            | .03       |
|        |       | 4         | .61                  | .00         | .10  | .00            | .00       |
|        |       | 5         | .01                  | .24         | .45  | .00            | .10       |
|        |       | 6         | .05                  | .28         | .01  | .33            | .03       |
|        |       | 7         | .00                  | .39         | .08  | .56            | .21       |
|        |       | 8         | .13                  | .02         | .00  | .00            | .48       |
|        |       | 9         | .01                  | .01         | .05  | .03            | .14       |

## Collinearity Diagnostics<sup>a</sup>

| Nation | Model | Dimension | Variance Proportions |               |
|--------|-------|-----------|----------------------|---------------|
|        |       |           | valuing              | inflexibility |
| Korea  | 1     | 1         | .00                  | .00           |
|        |       | 2         | .00                  | .01           |
|        |       | 3         | .00                  | .02           |
|        |       | 4         | .00                  | .17           |
|        |       | 5         | .01                  | .01           |
|        |       | 6         | .01                  | .62           |
|        |       | 7         | .02                  | .01           |
|        |       | 8         | .41                  | .09           |
|        |       | 9         | .54                  | .07           |
| Canada | 1     | 1         | .00                  | .00           |
|        |       | 2         | .00                  | .03           |
|        |       | 3         | .00                  | .45           |
|        |       | 4         | .00                  | .12           |
|        |       | 5         | .04                  | .08           |
|        |       | 6         | .00                  | .21           |
|        |       | 7         | .06                  | .01           |
|        |       | 8         | .60                  | .01           |
|        |       | 9         | .30                  | .09           |

a. Dependent Variable: life\_satisfaction

```

REGRESSION
  /MISSING LISTWISE
  /STATISTICS COEFF OUTS CI(95) R ANOVA COLLIN TOL ZPP
  /CRITERIA=PIN(.05) POUT(.10)
  /NOORIGIN
  /DEPENDENT negative_affect
  /METHOD=ENTER eudaimonism inclusive externality fear transformative fragi
lity valuing
  inflexibility.

```

## Regression



## Notes

|                        |                                               |                                                                                                                                                                                                                                                                       |
|------------------------|-----------------------------------------------|-----------------------------------------------------------------------------------------------------------------------------------------------------------------------------------------------------------------------------------------------------------------------|
| Output Created         |                                               | 20-MAY-2019 12:20:20                                                                                                                                                                                                                                                  |
| Comments               |                                               |                                                                                                                                                                                                                                                                       |
| Input                  | Data                                          | C:\Users\1\Desktop\korea cnada study\merge korea canada\final.sav                                                                                                                                                                                                     |
|                        | Active Dataset                                | DataSet1                                                                                                                                                                                                                                                              |
|                        | Filter                                        | <none>                                                                                                                                                                                                                                                                |
|                        | Weight                                        | <none>                                                                                                                                                                                                                                                                |
|                        | Split File                                    | Nation                                                                                                                                                                                                                                                                |
|                        | N of Rows in Working Data File                | 1837                                                                                                                                                                                                                                                                  |
| Missing Value Handling | Definition of Missing                         | User-defined missing values are treated as missing.                                                                                                                                                                                                                   |
|                        | Cases Used                                    | Statistics are based on cases with no missing values for any variable used.                                                                                                                                                                                           |
| Syntax                 |                                               | <pre> REGRESSION /MISSING LISTWISE /STATISTICS COEFF OUTS CI(95) R ANOVA COLLIN TOL ZPP /CRITERIA=PIN(.05) POUT(.10) /NOORIGIN /DEPENDENT negative_affect /METHOD=ENTER eudaimonism inclusive externality fear transformative fragility valuing inflexibility. </pre> |
| Resources              | Processor Time                                | 00:00:00.03                                                                                                                                                                                                                                                           |
|                        | Elapsed Time                                  | 00:00:00.03                                                                                                                                                                                                                                                           |
|                        | Memory Required                               | 13728 bytes                                                                                                                                                                                                                                                           |
|                        | Additional Memory Required for Residual Plots | 0 bytes                                                                                                                                                                                                                                                               |

### Variables Entered/Removed<sup>a</sup>

| Nation | Model | Variables Entered                                                                                         | Variables Removed | Method |
|--------|-------|-----------------------------------------------------------------------------------------------------------|-------------------|--------|
| Korea  | 1     | inflexibility, transformative, eudaimonism, inclusive, valuing, fragility, externality, fear <sup>b</sup> | .                 | Enter  |
| Canada | 1     | inflexibility, transformative, eudaimonism, inclusive, fragility, valuing, fear, externality <sup>b</sup> | .                 | Enter  |

a. Dependent Variable: negative\_affect

b. All requested variables entered.

### Model Summary

| Nation | Model | R                 | R Square | Adjusted R Square | Std. Error of the Estimate |
|--------|-------|-------------------|----------|-------------------|----------------------------|
| Korea  | 1     | .473 <sup>a</sup> | .224     | .219              | .68994                     |
| Canada | 1     | .537 <sup>b</sup> | .288     | .280              | .74793                     |

a. Predictors: (Constant), inflexibility, transformative, eudaimonism, inclusive, valuing, fragility, externality, fear

b. Predictors: (Constant), inflexibility, transformative, eudaimonism, inclusive, fragility, valuing, fear, externality

### ANOVA<sup>a</sup>

| Nation | Model |            | Sum of Squares | df   | Mean Square | F      | Sig.              |
|--------|-------|------------|----------------|------|-------------|--------|-------------------|
| Korea  | 1     | Regression | 160.447        | 8    | 20.056      | 42.133 | .000 <sup>b</sup> |
|        |       | Residual   | 555.985        | 1168 | .476        |        |                   |
|        |       | Total      | 716.432        | 1176 |             |        |                   |
| Canada | 1     | Regression | 147.579        | 8    | 18.447      | 32.977 | .000 <sup>c</sup> |
|        |       | Residual   | 364.171        | 651  | .559        |        |                   |
|        |       | Total      | 511.750        | 659  |             |        |                   |

a. Dependent Variable: negative\_affect

b. Predictors: (Constant), inflexibility, transformative, eudaimonism, inclusive, valuing, fragility, externality, fear

c. Predictors: (Constant), inflexibility, transformative, eudaimonism, inclusive, fragility, valuing, fear, externality

### Coefficients<sup>a</sup>

| Nation | Model |                | Unstandardized Coefficients |            | Standardized Coefficients | t      |
|--------|-------|----------------|-----------------------------|------------|---------------------------|--------|
|        |       |                | B                           | Std. Error | Beta                      |        |
| Korea  | 1     | (Constant)     | .157                        | .182       |                           | .864   |
|        |       | eudaimonism    | .003                        | .004       | .019                      | .722   |
|        |       | inclusive      | -.033                       | .018       | -.048                     | -1.806 |
|        |       | externality    | .176                        | .023       | .240                      | 7.674  |
|        |       | fear           | .119                        | .023       | .164                      | 5.245  |
|        |       | transformative | -.033                       | .020       | -.048                     | -1.635 |
|        |       | fragility      | .092                        | .020       | .126                      | 4.528  |
|        |       | valuing        | .212                        | .030       | .194                      | 7.002  |
|        |       | inflexibility  | -.048                       | .020       | -.066                     | -2.399 |
| Canada | 1     | (Constant)     | .500                        | .198       |                           | 2.526  |
|        |       | eudaimonism    | .002                        | .005       | .012                      | .367   |
|        |       | inclusive      | .003                        | .023       | .005                      | .141   |
|        |       | externality    | .107                        | .030       | .160                      | 3.587  |
|        |       | fear           | .157                        | .028       | .248                      | 5.699  |
|        |       | transformative | -.008                       | .025       | -.012                     | -.332  |
|        |       | fragility      | .047                        | .026       | .070                      | 1.846  |
|        |       | valuing        | .245                        | .035       | .273                      | 7.079  |
|        |       | inflexibility  | -.113                       | .027       | -.162                     | -4.271 |

### Coefficients<sup>a</sup>

| Nation | Model |                | Sig. | 95.0% Confidence Interval for B |             | Correlations |
|--------|-------|----------------|------|---------------------------------|-------------|--------------|
|        |       |                |      | Lower Bound                     | Upper Bound | Zero-order   |
| Korea  | 1     | (Constant)     | .388 | -.200                           | .514        |              |
|        |       | eudaimonism    | .471 | -.005                           | .011        | -.014        |
|        |       | inclusive      | .071 | -.070                           | .003        | -.073        |
|        |       | externality    | .000 | .131                            | .221        | .366         |
|        |       | fear           | .000 | .074                            | .163        | .324         |
|        |       | transformative | .102 | -.073                           | .007        | .074         |
|        |       | fragility      | .000 | .052                            | .132        | .225         |
|        |       | valuing        | .000 | .153                            | .272        | .307         |
|        |       | inflexibility  | .017 | -.088                           | -.009       | .071         |
| Canada | 1     | (Constant)     | .012 | .111                            | .889        |              |
|        |       | eudaimonism    | .714 | -.009                           | .013        | -.037        |
|        |       | inclusive      | .888 | -.042                           | .049        | .038         |
|        |       | externality    | .000 | .048                            | .165        | .365         |
|        |       | fear           | .000 | .103                            | .211        | .412         |
|        |       | transformative | .740 | -.057                           | .041        | .135         |
|        |       | fragility      | .065 | -.003                           | .098        | .289         |
|        |       | valuing        | .000 | .177                            | .313        | .426         |
|        |       | inflexibility  | .000 | -.166                           | -.061       | .044         |

### Coefficients<sup>a</sup>

| Nation | Model |                | Correlations |       | Collinearity Statistics |       |
|--------|-------|----------------|--------------|-------|-------------------------|-------|
|        |       |                | Partial      | Part  | Tolerance               | VIF   |
| Korea  | 1     | (Constant)     |              |       |                         |       |
|        |       | eudaimonism    | .021         | .019  | .953                    | 1.050 |
|        |       | inclusive      | -.053        | -.047 | .935                    | 1.069 |
|        |       | externality    | .219         | .198  | .682                    | 1.467 |
|        |       | fear           | .152         | .135  | .679                    | 1.473 |
|        |       | transformative | -.048        | -.042 | .761                    | 1.314 |
|        |       | fragility      | .131         | .117  | .864                    | 1.158 |
|        |       | valuing        | .201         | .180  | .862                    | 1.161 |
|        |       | inflexibility  | -.070        | -.062 | .878                    | 1.138 |
| Canada | 1     | (Constant)     |              |       |                         |       |
|        |       | eudaimonism    | .014         | .012  | .951                    | 1.051 |
|        |       | inclusive      | .006         | .005  | .908                    | 1.101 |
|        |       | externality    | .139         | .119  | .548                    | 1.826 |
|        |       | fear           | .218         | .188  | .575                    | 1.738 |
|        |       | transformative | -.013        | -.011 | .845                    | 1.183 |
|        |       | fragility      | .072         | .061  | .767                    | 1.304 |
|        |       | valuing        | .267         | .234  | .733                    | 1.364 |
|        |       | inflexibility  | -.165        | -.141 | .764                    | 1.309 |

a. Dependent Variable: negative\_affect

### Collinearity Diagnostics<sup>a</sup>

| Nation | Model | Dimension | Eigenvalue | Condition Index | Variance Proportions |             |
|--------|-------|-----------|------------|-----------------|----------------------|-------------|
|        |       |           |            |                 | (Constant)           | eudaimonism |
| Korea  | 1     | 1         | 8.436      | 1.000           | .00                  | .00         |
|        |       | 2         | .167       | 7.107           | .00                  | .12         |
|        |       | 3         | .106       | 8.931           | .00                  | .48         |
|        |       | 4         | .092       | 9.578           | .00                  | .04         |
|        |       | 5         | .074       | 10.661          | .00                  | .25         |
|        |       | 6         | .053       | 12.604          | .00                  | .00         |
|        |       | 7         | .038       | 14.840          | .01                  | .01         |
|        |       | 8         | .025       | 18.508          | .04                  | .02         |
|        |       | 9         | .009       | 30.399          | .94                  | .09         |
| Canada | 1     | 1         | 8.212      | 1.000           | .00                  | .00         |
|        |       | 2         | .264       | 5.575           | .00                  | .06         |
|        |       | 3         | .145       | 7.533           | .00                  | .02         |
|        |       | 4         | .110       | 8.658           | .00                  | .21         |
|        |       | 5         | .086       | 9.784           | .00                  | .18         |
|        |       | 6         | .074       | 10.530          | .00                  | .32         |
|        |       | 7         | .055       | 12.213          | .01                  | .00         |
|        |       | 8         | .037       | 14.804          | .01                  | .01         |
|        |       | 9         | .017       | 21.985          | .96                  | .21         |

## Collinearity Diagnostics<sup>a</sup>

| Nation | Model | Dimension | Variance Proportions |             |      |                |           |
|--------|-------|-----------|----------------------|-------------|------|----------------|-----------|
|        |       |           | inclusive            | externality | fear | transformative | fragility |
| Korea  | 1     | 1         | .00                  | .00         | .00  | .00            | .00       |
|        |       | 2         | .23                  | .11         | .10  | .00            | .00       |
|        |       | 3         | .46                  | .01         | .01  | .01            | .00       |
|        |       | 4         | .05                  | .05         | .41  | .10            | .00       |
|        |       | 5         | .15                  | .15         | .10  | .18            | .10       |
|        |       | 6         | .00                  | .34         | .15  | .00            | .09       |
|        |       | 7         | .00                  | .31         | .21  | .71            | .18       |
|        |       | 8         | .07                  | .02         | .00  | .00            | .52       |
|        |       | 9         | .03                  | .00         | .01  | .00            | .11       |
| Canada | 1     | 1         | .00                  | .00         | .00  | .00            | .00       |
|        |       | 2         | .08                  | .06         | .19  | .01            | .00       |
|        |       | 3         | .11                  | .01         | .12  | .06            | .03       |
|        |       | 4         | .61                  | .00         | .10  | .00            | .00       |
|        |       | 5         | .01                  | .24         | .45  | .00            | .10       |
|        |       | 6         | .05                  | .28         | .01  | .33            | .03       |
|        |       | 7         | .00                  | .39         | .08  | .56            | .21       |
|        |       | 8         | .13                  | .02         | .00  | .00            | .48       |
|        |       | 9         | .01                  | .01         | .05  | .03            | .14       |

## Collinearity Diagnostics<sup>a</sup>

| Nation | Model | Dimension | Variance Proportions |               |
|--------|-------|-----------|----------------------|---------------|
|        |       |           | valuing              | inflexibility |
| Korea  | 1     | 1         | .00                  | .00           |
|        |       | 2         | .00                  | .01           |
|        |       | 3         | .00                  | .02           |
|        |       | 4         | .00                  | .17           |
|        |       | 5         | .01                  | .01           |
|        |       | 6         | .01                  | .62           |
|        |       | 7         | .02                  | .01           |
|        |       | 8         | .41                  | .09           |
|        |       | 9         | .54                  | .07           |
| Canada | 1     | 1         | .00                  | .00           |
|        |       | 2         | .00                  | .03           |
|        |       | 3         | .00                  | .45           |
|        |       | 4         | .00                  | .12           |
|        |       | 5         | .04                  | .08           |
|        |       | 6         | .00                  | .21           |
|        |       | 7         | .06                  | .01           |
|        |       | 8         | .60                  | .01           |
|        |       | 9         | .30                  | .09           |

a. Dependent Variable: negative\_affect

```

REGRESSION
  /MISSING LISTWISE
  /STATISTICS COEFF OUTS CI(95) R ANOVA COLLIN TOL ZPP
  /CRITERIA=PIN(.05) POUT(.10)
  /NOORIGIN
  /DEPENDENT positive_affect
  /METHOD=ENTER eudaimonism inclusive externality fear transformative fragi
lity valuing
  inflexibility.

```

## Regression



## Notes

|                        |                                               |                                                                                                                                                                                                                                                                                                     |
|------------------------|-----------------------------------------------|-----------------------------------------------------------------------------------------------------------------------------------------------------------------------------------------------------------------------------------------------------------------------------------------------------|
| Output Created         |                                               | 20-MAY-2019 12:20:28                                                                                                                                                                                                                                                                                |
| Comments               |                                               |                                                                                                                                                                                                                                                                                                     |
| Input                  | Data                                          | C:\Users\1\Desktop\korea cnada study\merge korea canada\final.sav                                                                                                                                                                                                                                   |
|                        | Active Dataset                                | DataSet1                                                                                                                                                                                                                                                                                            |
|                        | Filter                                        | <none>                                                                                                                                                                                                                                                                                              |
|                        | Weight                                        | <none>                                                                                                                                                                                                                                                                                              |
|                        | Split File                                    | Nation                                                                                                                                                                                                                                                                                              |
|                        | N of Rows in Working Data File                | 1837                                                                                                                                                                                                                                                                                                |
| Missing Value Handling | Definition of Missing                         | User-defined missing values are treated as missing.                                                                                                                                                                                                                                                 |
|                        | Cases Used                                    | Statistics are based on cases with no missing values for any variable used.                                                                                                                                                                                                                         |
| Syntax                 |                                               | <pre> REGRESSION   /MISSING LISTWISE   /STATISTICS COEFF   OUTS CI(95) R ANOVA   COLLIN TOL ZPP   /CRITERIA=PIN(.05)   POUT(.10)   /NOORIGIN   /DEPENDENT   positive_affect   /METHOD=ENTER   eudaimonism inclusive   externality fear   transformative fragility   valuing   inflexibility. </pre> |
| Resources              | Processor Time                                | 00:00:00.02                                                                                                                                                                                                                                                                                         |
|                        | Elapsed Time                                  | 00:00:00.03                                                                                                                                                                                                                                                                                         |
|                        | Memory Required                               | 13728 bytes                                                                                                                                                                                                                                                                                         |
|                        | Additional Memory Required for Residual Plots | 0 bytes                                                                                                                                                                                                                                                                                             |

### Variables Entered/Removed<sup>a</sup>

| Nation | Model | Variables Entered                                                                                         | Variables Removed | Method |
|--------|-------|-----------------------------------------------------------------------------------------------------------|-------------------|--------|
| Korea  | 1     | inflexibility, transformative, eudaimonism, inclusive, valuing, fragility, externality, fear <sup>b</sup> | .                 | Enter  |
| Canada | 1     | inflexibility, transformative, eudaimonism, inclusive, fragility, valuing, fear, externality <sup>b</sup> | .                 | Enter  |

a. Dependent Variable: positive\_affect

b. All requested variables entered.

### Model Summary

| Nation | Model | R                 | R Square | Adjusted R Square | Std. Error of the Estimate |
|--------|-------|-------------------|----------|-------------------|----------------------------|
| Korea  | 1     | .432 <sup>a</sup> | .186     | .181              | .67877                     |
| Canada | 1     | .551 <sup>b</sup> | .304     | .295              | .72388                     |

a. Predictors: (Constant), inflexibility, transformative, eudaimonism, inclusive, valuing, fragility, externality, fear

b. Predictors: (Constant), inflexibility, transformative, eudaimonism, inclusive, fragility, valuing, fear, externality

### ANOVA<sup>a</sup>

| Nation | Model |            | Sum of Squares | df   | Mean Square | F      | Sig.              |
|--------|-------|------------|----------------|------|-------------|--------|-------------------|
| Korea  | 1     | Regression | 123.311        | 8    | 15.414      | 33.456 | .000 <sup>b</sup> |
|        |       | Residual   | 538.127        | 1168 | .461        |        |                   |
|        |       | Total      | 661.438        | 1176 |             |        |                   |
| Canada | 1     | Regression | 148.972        | 8    | 18.621      | 35.537 | .000 <sup>c</sup> |
|        |       | Residual   | 341.122        | 651  | .524        |        |                   |
|        |       | Total      | 490.093        | 659  |             |        |                   |

a. Dependent Variable: positive\_affect

b. Predictors: (Constant), inflexibility, transformative, eudaimonism, inclusive, valuing, fragility, externality, fear

c. Predictors: (Constant), inflexibility, transformative, eudaimonism, inclusive, fragility, valuing, fear, externality

### Coefficients<sup>a</sup>

| Nation | Model |                | Unstandardized Coefficients |            | Standardized Coefficients | t      |
|--------|-------|----------------|-----------------------------|------------|---------------------------|--------|
|        |       |                | B                           | Std. Error | Beta                      |        |
| Korea  | 1     | (Constant)     | 3.569                       | .179       |                           | 19.942 |
|        |       | eudaimonism    | -.009                       | .004       | -.061                     | -2.258 |
|        |       | inclusive      | .117                        | .018       | .176                      | 6.447  |
|        |       | externality    | -.132                       | .023       | -.187                     | -5.853 |
|        |       | fear           | -.126                       | .022       | -.181                     | -5.636 |
|        |       | transformative | .114                        | .020       | .174                      | 5.736  |
|        |       | fragility      | -.110                       | .020       | -.156                     | -5.479 |
|        |       | valuing        | -.024                       | .030       | -.023                     | -.820  |
|        |       | inflexibility  | .015                        | .020       | .021                      | .739   |
| Canada | 1     | (Constant)     | 3.522                       | .192       |                           | 18.377 |
|        |       | eudaimonism    | .000                        | .005       | .003                      | .083   |
|        |       | inclusive      | .131                        | .022       | .200                      | 5.820  |
|        |       | externality    | -.138                       | .029       | -.212                     | -4.797 |
|        |       | fear           | -.201                       | .027       | -.324                     | -7.516 |
|        |       | transformative | .066                        | .024       | .097                      | 2.718  |
|        |       | fragility      | -.058                       | .025       | -.088                     | -2.361 |
|        |       | valuing        | -.082                       | .033       | -.094                     | -2.461 |
|        |       | inflexibility  | .125                        | .026       | .182                      | 4.865  |

### Coefficients<sup>a</sup>

| Nation | Model |                | Sig. | 95.0% Confidence Interval for B |             | Correlations<br>Zero-order |
|--------|-------|----------------|------|---------------------------------|-------------|----------------------------|
|        |       |                |      | Lower Bound                     | Upper Bound |                            |
| Korea  | 1     | (Constant)     | .000 | 3.218                           | 3.920       |                            |
|        |       | eudaimonism    | .024 | -.016                           | -.001       | -.004                      |
|        |       | inclusive      | .000 | .082                            | .153        | .227                       |
|        |       | externality    | .000 | -.176                           | -.088       | -.300                      |
|        |       | fear           | .000 | -.170                           | -.082       | -.246                      |
|        |       | transformative | .000 | .075                            | .153        | .085                       |
|        |       | fragility      | .000 | -.149                           | -.071       | -.193                      |
|        |       | valuing        | .413 | -.083                           | .034        | -.105                      |
|        |       | inflexibility  | .460 | -.024                           | .053        | -.078                      |
| Canada | 1     | (Constant)     | .000 | 3.146                           | 3.898       |                            |
|        |       | eudaimonism    | .934 | -.010                           | .011        | .076                       |
|        |       | inclusive      | .000 | .087                            | .175        | .217                       |
|        |       | externality    | .000 | -.194                           | -.081       | -.376                      |
|        |       | fear           | .000 | -.253                           | -.148       | -.430                      |
|        |       | transformative | .007 | .018                            | .113        | -.019                      |
|        |       | fragility      | .019 | -.107                           | -.010       | -.287                      |
|        |       | valuing        | .014 | -.148                           | -.017       | -.247                      |
|        |       | inflexibility  | .000 | .075                            | .175        | -.028                      |

### Coefficients<sup>a</sup>

| Nation | Model |                | Correlations |       | Collinearity Statistics |       |
|--------|-------|----------------|--------------|-------|-------------------------|-------|
|        |       |                | Partial      | Part  | Tolerance               | VIF   |
| Korea  | 1     | (Constant)     |              |       |                         |       |
|        |       | eudaimonism    | -.066        | -.060 | .953                    | 1.050 |
|        |       | inclusive      | .185         | .170  | .935                    | 1.069 |
|        |       | externality    | -.169        | -.154 | .682                    | 1.467 |
|        |       | fear           | -.163        | -.149 | .679                    | 1.473 |
|        |       | transformative | .166         | .151  | .761                    | 1.314 |
|        |       | fragility      | -.158        | -.145 | .864                    | 1.158 |
|        |       | valuing        | -.024        | -.022 | .862                    | 1.161 |
|        |       | inflexibility  | .022         | .019  | .878                    | 1.138 |
| Canada | 1     | (Constant)     |              |       |                         |       |
|        |       | eudaimonism    | .003         | .003  | .951                    | 1.051 |
|        |       | inclusive      | .222         | .190  | .908                    | 1.101 |
|        |       | externality    | -.185        | -.157 | .548                    | 1.826 |
|        |       | fear           | -.283        | -.246 | .575                    | 1.738 |
|        |       | transformative | .106         | .089  | .845                    | 1.183 |
|        |       | fragility      | -.092        | -.077 | .767                    | 1.304 |
|        |       | valuing        | -.096        | -.080 | .733                    | 1.364 |
|        |       | inflexibility  | .187         | .159  | .764                    | 1.309 |

a. Dependent Variable: positive\_affect

### Collinearity Diagnostics<sup>a</sup>

| Nation | Model | Dimension | Eigenvalue | Condition Index | Variance Proportions |             |
|--------|-------|-----------|------------|-----------------|----------------------|-------------|
|        |       |           |            |                 | (Constant)           | eudaimonism |
| Korea  | 1     | 1         | 8.436      | 1.000           | .00                  | .00         |
|        |       | 2         | .167       | 7.107           | .00                  | .12         |
|        |       | 3         | .106       | 8.931           | .00                  | .48         |
|        |       | 4         | .092       | 9.578           | .00                  | .04         |
|        |       | 5         | .074       | 10.661          | .00                  | .25         |
|        |       | 6         | .053       | 12.604          | .00                  | .00         |
|        |       | 7         | .038       | 14.840          | .01                  | .01         |
|        |       | 8         | .025       | 18.508          | .04                  | .02         |
|        |       | 9         | .009       | 30.399          | .94                  | .09         |
| Canada | 1     | 1         | 8.212      | 1.000           | .00                  | .00         |
|        |       | 2         | .264       | 5.575           | .00                  | .06         |
|        |       | 3         | .145       | 7.533           | .00                  | .02         |
|        |       | 4         | .110       | 8.658           | .00                  | .21         |
|        |       | 5         | .086       | 9.784           | .00                  | .18         |
|        |       | 6         | .074       | 10.530          | .00                  | .32         |
|        |       | 7         | .055       | 12.213          | .01                  | .00         |
|        |       | 8         | .037       | 14.804          | .01                  | .01         |
|        |       | 9         | .017       | 21.985          | .96                  | .21         |

## Collinearity Diagnostics<sup>a</sup>

| Nation | Model | Dimension | Variance Proportions |             |      |                |           |
|--------|-------|-----------|----------------------|-------------|------|----------------|-----------|
|        |       |           | inclusive            | externality | fear | transformative | fragility |
| Korea  | 1     | 1         | .00                  | .00         | .00  | .00            | .00       |
|        |       | 2         | .23                  | .11         | .10  | .00            | .00       |
|        |       | 3         | .46                  | .01         | .01  | .01            | .00       |
|        |       | 4         | .05                  | .05         | .41  | .10            | .00       |
|        |       | 5         | .15                  | .15         | .10  | .18            | .10       |
|        |       | 6         | .00                  | .34         | .15  | .00            | .09       |
|        |       | 7         | .00                  | .31         | .21  | .71            | .18       |
|        |       | 8         | .07                  | .02         | .00  | .00            | .52       |
|        |       | 9         | .03                  | .00         | .01  | .00            | .11       |
| Canada | 1     | 1         | .00                  | .00         | .00  | .00            | .00       |
|        |       | 2         | .08                  | .06         | .19  | .01            | .00       |
|        |       | 3         | .11                  | .01         | .12  | .06            | .03       |
|        |       | 4         | .61                  | .00         | .10  | .00            | .00       |
|        |       | 5         | .01                  | .24         | .45  | .00            | .10       |
|        |       | 6         | .05                  | .28         | .01  | .33            | .03       |
|        |       | 7         | .00                  | .39         | .08  | .56            | .21       |
|        |       | 8         | .13                  | .02         | .00  | .00            | .48       |
|        |       | 9         | .01                  | .01         | .05  | .03            | .14       |

## Collinearity Diagnostics<sup>a</sup>

| Nation | Model | Dimension | Variance Proportions |               |
|--------|-------|-----------|----------------------|---------------|
|        |       |           | valuing              | inflexibility |
| Korea  | 1     | 1         | .00                  | .00           |
|        |       | 2         | .00                  | .01           |
|        |       | 3         | .00                  | .02           |
|        |       | 4         | .00                  | .17           |
|        |       | 5         | .01                  | .01           |
|        |       | 6         | .01                  | .62           |
|        |       | 7         | .02                  | .01           |
|        |       | 8         | .41                  | .09           |
|        |       | 9         | .54                  | .07           |
| Canada | 1     | 1         | .00                  | .00           |
|        |       | 2         | .00                  | .03           |
|        |       | 3         | .00                  | .45           |
|        |       | 4         | .00                  | .12           |
|        |       | 5         | .04                  | .08           |
|        |       | 6         | .00                  | .21           |
|        |       | 7         | .06                  | .01           |
|        |       | 8         | .60                  | .01           |
|        |       | 9         | .30                  | .09           |

a. Dependent Variable: positive\_affect

REGRESSION

/MISSING LISTWISE

/STATISTICS COEFF OUTS CI(95) R ANOVA COLLIN TOL ZPP

/CRITERIA=PIN(.05) POUT(.10)

/NOORIGIN

/DEPENDENT eudaimonism

/METHOD=ENTER extraversion agreeable conscientiousness neuroticism openne

ss.

## Regression



## Notes

|                        |                                                  |                                                                                                                                                                                                                                                                     |
|------------------------|--------------------------------------------------|---------------------------------------------------------------------------------------------------------------------------------------------------------------------------------------------------------------------------------------------------------------------|
| Output Created         |                                                  | 20-MAY-2019 12:20:59                                                                                                                                                                                                                                                |
| Comments               |                                                  |                                                                                                                                                                                                                                                                     |
| Input                  | Data                                             | C:\Users\1\Desktop\korea<br>cnada study\merge korea<br>canada\final.sav                                                                                                                                                                                             |
|                        | Active Dataset                                   | DataSet1                                                                                                                                                                                                                                                            |
|                        | Filter                                           | <none>                                                                                                                                                                                                                                                              |
|                        | Weight                                           | <none>                                                                                                                                                                                                                                                              |
|                        | Split File                                       | Nation                                                                                                                                                                                                                                                              |
|                        | N of Rows in Working Data<br>File                | 1837                                                                                                                                                                                                                                                                |
| Missing Value Handling | Definition of Missing                            | User-defined missing<br>values are treated as<br>missing.                                                                                                                                                                                                           |
|                        | Cases Used                                       | Statistics are based on<br>cases with no missing<br>values for any variable<br>used.                                                                                                                                                                                |
| Syntax                 |                                                  | REGRESSION<br>/MISSING LISTWISE<br>/STATISTICS COEFF<br>OUTS CI(95) R ANOVA<br>COLLIN TOL ZPP<br>/CRITERIA=PIN(.05)<br>POUT(.10)<br>/NOORIGIN<br>/DEPENDENT<br>eudaimonism<br>/METHOD=ENTER<br>extraversion agreeable<br>conscientiousness<br>neuroticism openness. |
| Resources              | Processor Time                                   | 00:00:00.02                                                                                                                                                                                                                                                         |
|                        | Elapsed Time                                     | 00:00:00.04                                                                                                                                                                                                                                                         |
|                        | Memory Required                                  | 11408 bytes                                                                                                                                                                                                                                                         |
|                        | Additional Memory<br>Required for Residual Plots | 0 bytes                                                                                                                                                                                                                                                             |

### Variables Entered/Removed<sup>a</sup>

| Nation | Model | Variables Entered                                                              | Variables Removed | Method |
|--------|-------|--------------------------------------------------------------------------------|-------------------|--------|
| Korea  | 1     | openness, neuroticism, agreeable, conscientiousness, extraversion <sup>b</sup> | .                 | Enter  |
| Canada | 1     | openness, conscientiousness, extraversion, agreeable, neuroticism <sup>b</sup> | .                 | Enter  |

a. Dependent Variable: eudaimonism

b. All requested variables entered.

### Model Summary

| Nation | Model | R                 | R Square | Adjusted R Square | Std. Error of the Estimate |
|--------|-------|-------------------|----------|-------------------|----------------------------|
| Korea  | 1     | .157 <sup>a</sup> | .025     | .020              | 5.20151                    |
| Canada | 1     | .268 <sup>b</sup> | .072     | .065              | 5.25456                    |

a. Predictors: (Constant), openness, neuroticism, agreeable, conscientiousness, extraversion

b. Predictors: (Constant), openness, conscientiousness, extraversion, agreeable, neuroticism

### ANOVA<sup>a</sup>

| Nation | Model |            | Sum of Squares | df   | Mean Square | F      | Sig.              |
|--------|-------|------------|----------------|------|-------------|--------|-------------------|
| Korea  | 1     | Regression | 796.497        | 5    | 159.299     | 5.888  | .000 <sup>b</sup> |
|        |       | Residual   | 31682.273      | 1171 | 27.056      |        |                   |
|        |       | Total      | 32478.769      | 1176 |             |        |                   |
| Canada | 1     | Regression | 1401.843       | 5    | 280.369     | 10.154 | .000 <sup>c</sup> |
|        |       | Residual   | 18057.194      | 654  | 27.610      |        |                   |
|        |       | Total      | 19459.037      | 659  |             |        |                   |

a. Dependent Variable: eudaimonism

b. Predictors: (Constant), openness, neuroticism, agreeable, conscientiousness, extraversion

c. Predictors: (Constant), openness, conscientiousness, extraversion, agreeable, neuroticism

### Coefficients<sup>a</sup>

| Nation | Model |                   | Unstandardized Coefficients |            | Standardized Coefficients | t      |
|--------|-------|-------------------|-----------------------------|------------|---------------------------|--------|
|        |       |                   | B                           | Std. Error | Beta                      |        |
| Korea  | 1     | (Constant)        | 13.833                      | 1.460      |                           | 9.475  |
|        |       | extraversion      | .346                        | .247       | .047                      | 1.404  |
|        |       | agreeable         | -.428                       | .277       | -.052                     | -1.544 |
|        |       | conscientiousness | .603                        | .228       | .080                      | 2.646  |
|        |       | neuroticism       | -.706                       | .228       | -.092                     | -3.097 |
|        |       | openness          | .395                        | .240       | .050                      | 1.646  |
| Canada | 1     | (Constant)        | 9.686                       | 1.834      |                           | 5.280  |
|        |       | extraversion      | -.265                       | .225       | -.048                     | -1.179 |
|        |       | agreeable         | 1.070                       | .273       | .160                      | 3.915  |
|        |       | conscientiousness | -.119                       | .261       | -.019                     | -.455  |
|        |       | neuroticism       | -.288                       | .244       | -.049                     | -1.183 |
|        |       | openness          | 1.289                       | .273       | .184                      | 4.721  |

### Coefficients<sup>a</sup>

| Nation | Model |                   | Sig. | 95.0% Confidence Interval for B |             | Correlations |
|--------|-------|-------------------|------|---------------------------------|-------------|--------------|
|        |       |                   |      | Lower Bound                     | Upper Bound | Zero-order   |
| Korea  | 1     | (Constant)        | .000 | 10.969                          | 16.698      |              |
|        |       | extraversion      | .160 | -.137                           | .830        | .044         |
|        |       | agreeable         | .123 | -.971                           | .116        | -.005        |
|        |       | conscientiousness | .008 | .156                            | 1.050       | .109         |
|        |       | neuroticism       | .002 | -1.153                          | -.259       | -.110        |
|        |       | openness          | .100 | -.076                           | .865        | .069         |
| Canada | 1     | (Constant)        | .000 | 6.084                           | 13.288      |              |
|        |       | extraversion      | .239 | -.706                           | .176        | .037         |
|        |       | agreeable         | .000 | .533                            | 1.607       | .194         |
|        |       | conscientiousness | .649 | -.632                           | .394        | .043         |
|        |       | neuroticism       | .237 | -.766                           | .190        | -.074        |
|        |       | openness          | .000 | .753                            | 1.825       | .217         |

### Coefficients<sup>a</sup>

| Nation | Model |                   | Correlations |       | Collinearity Statistics |       |
|--------|-------|-------------------|--------------|-------|-------------------------|-------|
|        |       |                   | Partial      | Part  | Tolerance               | VIF   |
| Korea  | 1     | (Constant)        |              |       |                         |       |
|        |       | extraversion      | .041         | .041  | .739                    | 1.353 |
|        |       | agreeable         | -.045        | -.045 | .744                    | 1.344 |
|        |       | conscientiousness | .077         | .076  | .914                    | 1.094 |
|        |       | neuroticism       | -.090        | -.089 | .953                    | 1.049 |
|        |       | openness          | .048         | .048  | .918                    | 1.089 |
| Canada | 1     | (Constant)        |              |       |                         |       |
|        |       | extraversion      | -.046        | -.044 | .865                    | 1.156 |
|        |       | agreeable         | .151         | .147  | .847                    | 1.180 |
|        |       | conscientiousness | -.018        | -.017 | .851                    | 1.175 |
|        |       | neuroticism       | -.046        | -.045 | .834                    | 1.198 |
|        |       | openness          | .182         | .178  | .934                    | 1.070 |

a. Dependent Variable: eudaimonism

### Collinearity Diagnostics<sup>a</sup>

| Nation | Model | Dimension | Eigenvalue | Condition Index | Variance Proportions |              |
|--------|-------|-----------|------------|-----------------|----------------------|--------------|
|        |       |           |            |                 | (Constant)           | extraversion |
| Korea  | 1     | 1         | 5.830      | 1.000           | .00                  | .00          |
|        |       | 2         | .064       | 9.551           | .00                  | .12          |
|        |       | 3         | .047       | 11.186          | .01                  | .38          |
|        |       | 4         | .028       | 14.317          | .00                  | .01          |
|        |       | 5         | .023       | 16.050          | .00                  | .48          |
|        |       | 6         | .009       | 26.051          | .99                  | .00          |
| Canada | 1     | 1         | 5.709      | 1.000           | .00                  | .00          |
|        |       | 2         | .137       | 6.465           | .00                  | .27          |
|        |       | 3         | .072       | 8.933           | .00                  | .64          |
|        |       | 4         | .041       | 11.775          | .00                  | .03          |
|        |       | 5         | .031       | 13.511          | .00                  | .03          |
|        |       | 6         | .010       | 23.848          | 1.00                 | .03          |

## Collinearity Diagnostics<sup>a</sup>

| Nation | Model | Dimension | Variance Proportions |                   |             |          |
|--------|-------|-----------|----------------------|-------------------|-------------|----------|
|        |       |           | agreeable            | conscientiousness | neuroticism | openness |
| Korea  | 1     | 1         | .00                  | .00               | .00         | .00      |
|        |       | 2         | .02                  | .02               | .57         | .00      |
|        |       | 3         | .03                  | .26               | .05         | .08      |
|        |       | 4         | .00                  | .36               | .01         | .77      |
|        |       | 5         | .82                  | .05               | .02         | .03      |
|        |       | 6         | .13                  | .31               | .35         | .12      |
| Canada | 1     | 1         | .00                  | .00               | .00         | .00      |
|        |       | 2         | .00                  | .01               | .33         | .00      |
|        |       | 3         | .02                  | .18               | .17         | .02      |
|        |       | 4         | .02                  | .37               | .06         | .59      |
|        |       | 5         | .86                  | .12               | .00         | .23      |
|        |       | 6         | .09                  | .32               | .43         | .15      |

a. Dependent Variable: eudaimonism

REGRESSION

/MISSING LISTWISE

/STATISTICS COEFF OUTS CI(95) R ANOVA COLLIN TOL ZPP

/CRITERIA=PIN(.05) POUT(.10)

/NOORIGIN

/DEPENDENT inclusive

/METHOD=ENTER extraversion agreeable conscientiousness neuroticism openne

ss.

## Regression

## Notes

|                        |                                                                                                                                                                                                                                         |                                                                             |
|------------------------|-----------------------------------------------------------------------------------------------------------------------------------------------------------------------------------------------------------------------------------------|-----------------------------------------------------------------------------|
| Output Created         |                                                                                                                                                                                                                                         | 20-MAY-2019 12:21:07                                                        |
| Comments               |                                                                                                                                                                                                                                         |                                                                             |
| Input                  | Data                                                                                                                                                                                                                                    | C:\Users\1\Desktop\korea cnada study\merge korea canada\final.sav           |
|                        | Active Dataset                                                                                                                                                                                                                          | DataSet1                                                                    |
|                        | Filter                                                                                                                                                                                                                                  | <none>                                                                      |
|                        | Weight                                                                                                                                                                                                                                  | <none>                                                                      |
|                        | Split File                                                                                                                                                                                                                              | Nation                                                                      |
|                        | N of Rows in Working Data File                                                                                                                                                                                                          | 1837                                                                        |
| Missing Value Handling | Definition of Missing                                                                                                                                                                                                                   | User-defined missing values are treated as missing.                         |
|                        | Cases Used                                                                                                                                                                                                                              | Statistics are based on cases with no missing values for any variable used. |
| Syntax                 | <pre> REGRESSION /MISSING LISTWISE /STATISTICS COEFF OUTS CI(95) R ANOVA COLLIN TOL ZPP /CRITERIA=PIN(.05) POUT(.10) /NOORIGIN /DEPENDENT inclusive /METHOD=ENTER extraversion agreeable conscientiousness neuroticism openness. </pre> |                                                                             |
| Resources              | Processor Time                                                                                                                                                                                                                          | 00:00:00.02                                                                 |
|                        | Elapsed Time                                                                                                                                                                                                                            | 00:00:00.02                                                                 |
|                        | Memory Required                                                                                                                                                                                                                         | 11408 bytes                                                                 |
|                        | Additional Memory Required for Residual Plots                                                                                                                                                                                           | 0 bytes                                                                     |

### Variables Entered/Removed<sup>a</sup>

| Nation | Model | Variables Entered                                                              | Variables Removed | Method |
|--------|-------|--------------------------------------------------------------------------------|-------------------|--------|
| Korea  | 1     | openness, neuroticism, agreeable, conscientiousness, extraversion <sup>b</sup> | .                 | Enter  |
| Canada | 1     | openness, conscientiousness, extraversion, agreeable, neuroticism <sup>b</sup> | .                 | Enter  |

a. Dependent Variable: inclusive

b. All requested variables entered.

### Model Summary

| Nation | Model | R                 | R Square | Adjusted R Square | Std. Error of the Estimate |
|--------|-------|-------------------|----------|-------------------|----------------------------|
| Korea  | 1     | .149 <sup>a</sup> | .022     | .018              | 1.11637                    |
| Canada | 1     | .240 <sup>b</sup> | .058     | .050              | 1.28504                    |

a. Predictors: (Constant), openness, neuroticism, agreeable, conscientiousness, extraversion

b. Predictors: (Constant), openness, conscientiousness, extraversion, agreeable, neuroticism

### ANOVA<sup>a</sup>

| Nation | Model |            | Sum of Squares | df   | Mean Square | F     | Sig.              |
|--------|-------|------------|----------------|------|-------------|-------|-------------------|
| Korea  | 1     | Regression | 33.001         | 5    | 6.600       | 5.296 | .000 <sup>b</sup> |
|        |       | Residual   | 1459.408       | 1171 | 1.246       |       |                   |
|        |       | Total      | 1492.410       | 1176 |             |       |                   |
| Canada | 1     | Regression | 65.955         | 5    | 13.191      | 7.988 | .000 <sup>c</sup> |
|        |       | Residual   | 1079.967       | 654  | 1.651       |       |                   |
|        |       | Total      | 1145.922       | 659  |             |       |                   |

a. Dependent Variable: inclusive

b. Predictors: (Constant), openness, neuroticism, agreeable, conscientiousness, extraversion

c. Predictors: (Constant), openness, conscientiousness, extraversion, agreeable, neuroticism

### Coefficients<sup>a</sup>

| Nation | Model |                   | Unstandardized Coefficients |            | Standardized Coefficients | t      |
|--------|-------|-------------------|-----------------------------|------------|---------------------------|--------|
|        |       |                   | B                           | Std. Error | Beta                      |        |
| Korea  | 1     | (Constant)        | 2.543                       | .313       |                           | 8.116  |
|        |       | extraversion      | .031                        | .053       | .020                      | .589   |
|        |       | agreeable         | .165                        | .059       | .093                      | 2.776  |
|        |       | conscientiousness | .024                        | .049       | .015                      | .493   |
|        |       | neuroticism       | -.144                       | .049       | -.087                     | -2.943 |
|        |       | openness          | .037                        | .051       | .022                      | .726   |
| Canada | 1     | (Constant)        | 1.754                       | .449       |                           | 3.909  |
|        |       | extraversion      | .200                        | .055       | .149                      | 3.645  |
|        |       | agreeable         | .166                        | .067       | .102                      | 2.482  |
|        |       | conscientiousness | -.100                       | .064       | -.064                     | -1.564 |
|        |       | neuroticism       | .030                        | .060       | .021                      | .496   |
|        |       | openness          | .175                        | .067       | .103                      | 2.619  |

### Coefficients<sup>a</sup>

| Nation | Model |                   | Sig. | 95.0% Confidence Interval for B |             | Correlations |
|--------|-------|-------------------|------|---------------------------------|-------------|--------------|
|        |       |                   |      | Lower Bound                     | Upper Bound | Zero-order   |
| Korea  | 1     | (Constant)        | .000 | 1.928                           | 3.158       |              |
|        |       | extraversion      | .556 | -.073                           | .135        | .074         |
|        |       | agreeable         | .006 | .048                            | .282        | .112         |
|        |       | conscientiousness | .622 | -.072                           | .120        | .051         |
|        |       | neuroticism       | .003 | -.240                           | -.048       | -.095        |
|        |       | openness          | .468 | -.064                           | .138        | .052         |
| Canada | 1     | (Constant)        | .000 | .873                            | 2.635       |              |
|        |       | extraversion      | .000 | .092                            | .308        | .179         |
|        |       | agreeable         | .013 | .035                            | .297        | .151         |
|        |       | conscientiousness | .118 | -.225                           | .025        | -.017        |
|        |       | neuroticism       | .620 | -.087                           | .146        | -.023        |
|        |       | openness          | .009 | .044                            | .306        | .144         |



### Coefficients<sup>a</sup>

| Nation | Model |                   | Correlations |       | Collinearity Statistics |       |
|--------|-------|-------------------|--------------|-------|-------------------------|-------|
|        |       |                   | Partial      | Part  | Tolerance               | VIF   |
| Korea  | 1     | (Constant)        |              |       |                         |       |
|        |       | extraversion      | .017         | .017  | .739                    | 1.353 |
|        |       | agreeable         | .081         | .080  | .744                    | 1.344 |
|        |       | conscientiousness | .014         | .014  | .914                    | 1.094 |
|        |       | neuroticism       | -.086        | -.085 | .953                    | 1.049 |
|        |       | openness          | .021         | .021  | .918                    | 1.089 |
| Canada | 1     | (Constant)        |              |       |                         |       |
|        |       | extraversion      | .141         | .138  | .865                    | 1.156 |
|        |       | agreeable         | .097         | .094  | .847                    | 1.180 |
|        |       | conscientiousness | -.061        | -.059 | .851                    | 1.175 |
|        |       | neuroticism       | .019         | .019  | .834                    | 1.198 |
|        |       | openness          | .102         | .099  | .934                    | 1.070 |

a. Dependent Variable: inclusive

### Collinearity Diagnostics<sup>a</sup>

| Nation | Model | Dimension | Eigenvalue | Condition Index | Variance Proportions |              |
|--------|-------|-----------|------------|-----------------|----------------------|--------------|
|        |       |           |            |                 | (Constant)           | extraversion |
| Korea  | 1     | 1         | 5.830      | 1.000           | .00                  | .00          |
|        |       | 2         | .064       | 9.551           | .00                  | .12          |
|        |       | 3         | .047       | 11.186          | .01                  | .38          |
|        |       | 4         | .028       | 14.317          | .00                  | .01          |
|        |       | 5         | .023       | 16.050          | .00                  | .48          |
|        |       | 6         | .009       | 26.051          | .99                  | .00          |
| Canada | 1     | 1         | 5.709      | 1.000           | .00                  | .00          |
|        |       | 2         | .137       | 6.465           | .00                  | .27          |
|        |       | 3         | .072       | 8.933           | .00                  | .64          |
|        |       | 4         | .041       | 11.775          | .00                  | .03          |
|        |       | 5         | .031       | 13.511          | .00                  | .03          |
|        |       | 6         | .010       | 23.848          | 1.00                 | .03          |

## Collinearity Diagnostics<sup>a</sup>

| Nation | Model | Dimension | Variance Proportions |                   |             |          |
|--------|-------|-----------|----------------------|-------------------|-------------|----------|
|        |       |           | agreeable            | conscientiousness | neuroticism | openness |
| Korea  | 1     | 1         | .00                  | .00               | .00         | .00      |
|        |       | 2         | .02                  | .02               | .57         | .00      |
|        |       | 3         | .03                  | .26               | .05         | .08      |
|        |       | 4         | .00                  | .36               | .01         | .77      |
|        |       | 5         | .82                  | .05               | .02         | .03      |
|        |       | 6         | .13                  | .31               | .35         | .12      |
| Canada | 1     | 1         | .00                  | .00               | .00         | .00      |
|        |       | 2         | .00                  | .01               | .33         | .00      |
|        |       | 3         | .02                  | .18               | .17         | .02      |
|        |       | 4         | .02                  | .37               | .06         | .59      |
|        |       | 5         | .86                  | .12               | .00         | .23      |
|        |       | 6         | .09                  | .32               | .43         | .15      |

a. Dependent Variable: inclusive

REGRESSION

/MISSING LISTWISE

/STATISTICS COEFF OUTS CI(95) R ANOVA COLLIN TOL ZPP

/CRITERIA=PIN(.05) POUT(.10)

/NOORIGIN

/DEPENDENT externality

/METHOD=ENTER extraversion agreeable conscientiousness neuroticism openne

ss.

## Regression

## Notes

|                        |                                                  |                                                                                                                                                                                                                                                                  |
|------------------------|--------------------------------------------------|------------------------------------------------------------------------------------------------------------------------------------------------------------------------------------------------------------------------------------------------------------------|
| Output Created         |                                                  | 20-MAY-2019 12:21:13                                                                                                                                                                                                                                             |
| Comments               |                                                  |                                                                                                                                                                                                                                                                  |
| Input                  | Data                                             | C:\Users\1\Desktop\korea<br>cnada study\merge korea<br>canada\final.sav                                                                                                                                                                                          |
|                        | Active Dataset                                   | DataSet1                                                                                                                                                                                                                                                         |
|                        | Filter                                           | <none>                                                                                                                                                                                                                                                           |
|                        | Weight                                           | <none>                                                                                                                                                                                                                                                           |
|                        | Split File                                       | Nation                                                                                                                                                                                                                                                           |
|                        | N of Rows in Working Data<br>File                | 1837                                                                                                                                                                                                                                                             |
| Missing Value Handling | Definition of Missing                            | User-defined missing<br>values are treated as<br>missing.                                                                                                                                                                                                        |
|                        | Cases Used                                       | Statistics are based on<br>cases with no missing<br>values for any variable<br>used.                                                                                                                                                                             |
| Syntax                 |                                                  | REGRESSION<br>/MISSING LISTWISE<br>/STATISTICS COEFF<br>OUTS CI(95) R ANOVA<br>COLLIN TOL ZPP<br>/CRITERIA=PIN(.05)<br>POUT(.10)<br>/NOORIGIN<br>/DEPENDENT externality<br>/METHOD=ENTER<br>extraversion agreeable<br>conscientiousness<br>neuroticism openness. |
| Resources              | Processor Time                                   | 00:00:00.02                                                                                                                                                                                                                                                      |
|                        | Elapsed Time                                     | 00:00:00.07                                                                                                                                                                                                                                                      |
|                        | Memory Required                                  | 11408 bytes                                                                                                                                                                                                                                                      |
|                        | Additional Memory<br>Required for Residual Plots | 0 bytes                                                                                                                                                                                                                                                          |

### Variables Entered/Removed<sup>a</sup>

| Nation | Model | Variables Entered                                                              | Variables Removed | Method |
|--------|-------|--------------------------------------------------------------------------------|-------------------|--------|
| Korea  | 1     | openness, neuroticism, agreeable, conscientiousness, extraversion <sup>b</sup> | .                 | Enter  |
| Canada | 1     | openness, conscientiousness, extraversion, agreeable, neuroticism <sup>b</sup> | .                 | Enter  |

a. Dependent Variable: externality

b. All requested variables entered.

### Model Summary

| Nation | Model | R                 | R Square | Adjusted R Square | Std. Error of the Estimate |
|--------|-------|-------------------|----------|-------------------|----------------------------|
| Korea  | 1     | .288 <sup>a</sup> | .083     | .079              | 1.02161                    |
| Canada | 1     | .392 <sup>b</sup> | .154     | .147              | 1.22382                    |

a. Predictors: (Constant), openness, neuroticism, agreeable, conscientiousness, extraversion

b. Predictors: (Constant), openness, conscientiousness, extraversion, agreeable, neuroticism

### ANOVA<sup>a</sup>

| Nation | Model |            | Sum of Squares | df   | Mean Square | F      | Sig.              |
|--------|-------|------------|----------------|------|-------------|--------|-------------------|
| Korea  | 1     | Regression | 110.330        | 5    | 22.066      | 21.142 | .000 <sup>b</sup> |
|        |       | Residual   | 1222.161       | 1171 | 1.044       |        |                   |
|        |       | Total      | 1332.491       | 1176 |             |        |                   |
| Canada | 1     | Regression | 177.622        | 5    | 35.524      | 23.719 | .000 <sup>c</sup> |
|        |       | Residual   | 979.518        | 654  | 1.498       |        |                   |
|        |       | Total      | 1157.141       | 659  |             |        |                   |

a. Dependent Variable: externality

b. Predictors: (Constant), openness, neuroticism, agreeable, conscientiousness, extraversion

c. Predictors: (Constant), openness, conscientiousness, extraversion, agreeable, neuroticism

### Coefficients<sup>a</sup>

| Nation | Model |                   | Unstandardized Coefficients |            | Standardized Coefficients | t      |
|--------|-------|-------------------|-----------------------------|------------|---------------------------|--------|
|        |       |                   | B                           | Std. Error | Beta                      |        |
| Korea  | 1     | (Constant)        | 3.197                       | .287       |                           | 11.150 |
|        |       | extraversion      | -.078                       | .048       | -.053                     | -1.616 |
|        |       | agreeable         | -.129                       | .054       | -.077                     | -2.376 |
|        |       | conscientiousness | -.047                       | .045       | -.031                     | -1.054 |
|        |       | neuroticism       | .358                        | .045       | .230                      | 8.006  |
|        |       | openness          | -.110                       | .047       | -.068                     | -2.326 |
| Canada | 1     | (Constant)        | 4.632                       | .427       |                           | 10.841 |
|        |       | extraversion      | -.228                       | .052       | -.169                     | -4.361 |
|        |       | agreeable         | -.213                       | .064       | -.131                     | -3.339 |
|        |       | conscientiousness | -.140                       | .061       | -.090                     | -2.297 |
|        |       | neuroticism       | .244                        | .057       | .170                      | 4.310  |
|        |       | openness          | -.115                       | .064       | -.067                     | -1.809 |

### Coefficients<sup>a</sup>

| Nation | Model |                   | Sig. | 95.0% Confidence Interval for B |             | Correlations Zero-order |
|--------|-------|-------------------|------|---------------------------------|-------------|-------------------------|
|        |       |                   |      | Lower Bound                     | Upper Bound |                         |
| Korea  | 1     | (Constant)        | .000 | 2.634                           | 3.760       |                         |
|        |       | extraversion      | .106 | -.173                           | .017        | -.113                   |
|        |       | agreeable         | .018 | -.236                           | -.023       | -.129                   |
|        |       | conscientiousness | .292 | -.135                           | .041        | -.108                   |
|        |       | neuroticism       | .000 | .271                            | .446        | .244                    |
|        |       | openness          | .020 | -.202                           | -.017       | -.113                   |
| Canada | 1     | (Constant)        | .000 | 3.793                           | 5.471       |                         |
|        |       | extraversion      | .000 | -.331                           | -.125       | -.275                   |
|        |       | agreeable         | .001 | -.338                           | -.088       | -.246                   |
|        |       | conscientiousness | .022 | -.259                           | -.020       | -.210                   |
|        |       | neuroticism       | .000 | .133                            | .356        | .273                    |
|        |       | openness          | .071 | -.240                           | .010        | -.147                   |

### Coefficients<sup>a</sup>

| Nation | Model |                   | Correlations |       | Collinearity Statistics |       |
|--------|-------|-------------------|--------------|-------|-------------------------|-------|
|        |       |                   | Partial      | Part  | Tolerance               | VIF   |
| Korea  | 1     | (Constant)        |              |       |                         |       |
|        |       | extraversion      | -.047        | -.045 | .739                    | 1.353 |
|        |       | agreeable         | -.069        | -.066 | .744                    | 1.344 |
|        |       | conscientiousness | -.031        | -.030 | .914                    | 1.094 |
|        |       | neuroticism       | .228         | .224  | .953                    | 1.049 |
|        |       | openness          | -.068        | -.065 | .918                    | 1.089 |
| Canada | 1     | (Constant)        |              |       |                         |       |
|        |       | extraversion      | -.168        | -.157 | .865                    | 1.156 |
|        |       | agreeable         | -.129        | -.120 | .847                    | 1.180 |
|        |       | conscientiousness | -.089        | -.083 | .851                    | 1.175 |
|        |       | neuroticism       | .166         | .155  | .834                    | 1.198 |
|        |       | openness          | -.071        | -.065 | .934                    | 1.070 |

a. Dependent Variable: externality

### Collinearity Diagnostics<sup>a</sup>

| Nation | Model | Dimension | Eigenvalue | Condition Index | Variance Proportions |              |
|--------|-------|-----------|------------|-----------------|----------------------|--------------|
|        |       |           |            |                 | (Constant)           | extraversion |
| Korea  | 1     | 1         | 5.830      | 1.000           | .00                  | .00          |
|        |       | 2         | .064       | 9.551           | .00                  | .12          |
|        |       | 3         | .047       | 11.186          | .01                  | .38          |
|        |       | 4         | .028       | 14.317          | .00                  | .01          |
|        |       | 5         | .023       | 16.050          | .00                  | .48          |
|        |       | 6         | .009       | 26.051          | .99                  | .00          |
| Canada | 1     | 1         | 5.709      | 1.000           | .00                  | .00          |
|        |       | 2         | .137       | 6.465           | .00                  | .27          |
|        |       | 3         | .072       | 8.933           | .00                  | .64          |
|        |       | 4         | .041       | 11.775          | .00                  | .03          |
|        |       | 5         | .031       | 13.511          | .00                  | .03          |
|        |       | 6         | .010       | 23.848          | 1.00                 | .03          |

## Collinearity Diagnostics<sup>a</sup>

| Nation | Model | Dimension | Variance Proportions |                   |             |          |
|--------|-------|-----------|----------------------|-------------------|-------------|----------|
|        |       |           | agreeable            | conscientiousness | neuroticism | openness |
| Korea  | 1     | 1         | .00                  | .00               | .00         | .00      |
|        |       | 2         | .02                  | .02               | .57         | .00      |
|        |       | 3         | .03                  | .26               | .05         | .08      |
|        |       | 4         | .00                  | .36               | .01         | .77      |
|        |       | 5         | .82                  | .05               | .02         | .03      |
|        |       | 6         | .13                  | .31               | .35         | .12      |
| Canada | 1     | 1         | .00                  | .00               | .00         | .00      |
|        |       | 2         | .00                  | .01               | .33         | .00      |
|        |       | 3         | .02                  | .18               | .17         | .02      |
|        |       | 4         | .02                  | .37               | .06         | .59      |
|        |       | 5         | .86                  | .12               | .00         | .23      |
|        |       | 6         | .09                  | .32               | .43         | .15      |

a. Dependent Variable: externality

REGRESSION

/MISSING LISTWISE

/STATISTICS COEFF OUTS CI(95) R ANOVA COLLIN TOL ZPP

/CRITERIA=PIN(.05) POUT(.10)

/NOORIGIN

/DEPENDENT fear

/METHOD=ENTER extraversion agreeable conscientiousness neuroticism openne

ss.

## Regression

## Notes

|                        |                                               |                                                                                                                                                                                                                                    |
|------------------------|-----------------------------------------------|------------------------------------------------------------------------------------------------------------------------------------------------------------------------------------------------------------------------------------|
| Output Created         |                                               | 20-MAY-2019 12:21:20                                                                                                                                                                                                               |
| Comments               |                                               |                                                                                                                                                                                                                                    |
| Input                  | Data                                          | C:\Users\1\Desktop\korea cnada study\merge korea canada\final.sav                                                                                                                                                                  |
|                        | Active Dataset                                | DataSet1                                                                                                                                                                                                                           |
|                        | Filter                                        | <none>                                                                                                                                                                                                                             |
|                        | Weight                                        | <none>                                                                                                                                                                                                                             |
|                        | Split File                                    | Nation                                                                                                                                                                                                                             |
|                        | N of Rows in Working Data File                | 1837                                                                                                                                                                                                                               |
| Missing Value Handling | Definition of Missing                         | User-defined missing values are treated as missing.                                                                                                                                                                                |
|                        | Cases Used                                    | Statistics are based on cases with no missing values for any variable used.                                                                                                                                                        |
| Syntax                 |                                               | <pre> REGRESSION /MISSING LISTWISE /STATISTICS COEFF OUTS CI(95) R ANOVA COLLIN TOL ZPP /CRITERIA=PIN(.05) POUT(.10) /NOORIGIN /DEPENDENT fear /METHOD=ENTER extraversion agreeable conscientiousness neuroticism openness. </pre> |
| Resources              | Processor Time                                | 00:00:00.02                                                                                                                                                                                                                        |
|                        | Elapsed Time                                  | 00:00:00.03                                                                                                                                                                                                                        |
|                        | Memory Required                               | 11408 bytes                                                                                                                                                                                                                        |
|                        | Additional Memory Required for Residual Plots | 0 bytes                                                                                                                                                                                                                            |



### Variables Entered/Removed<sup>a</sup>

| Nation | Model | Variables Entered                                                              | Variables Removed | Method |
|--------|-------|--------------------------------------------------------------------------------|-------------------|--------|
| Korea  | 1     | openness, neuroticism, agreeable, conscientiousness, extraversion <sup>b</sup> | .                 | Enter  |
| Canada | 1     | openness, conscientiousness, extraversion, agreeable, neuroticism <sup>b</sup> | .                 | Enter  |

a. Dependent Variable: fear

b. All requested variables entered.

### Model Summary

| Nation | Model | R                 | R Square | Adjusted R Square | Std. Error of the Estimate |
|--------|-------|-------------------|----------|-------------------|----------------------------|
| Korea  | 1     | .227 <sup>a</sup> | .052     | .047              | 1.05078                    |
| Canada | 1     | .446 <sup>b</sup> | .199     | .193              | 1.25186                    |

a. Predictors: (Constant), openness, neuroticism, agreeable, conscientiousness, extraversion

b. Predictors: (Constant), openness, conscientiousness, extraversion, agreeable, neuroticism

### ANOVA<sup>a</sup>

| Nation | Model |            | Sum of Squares | df   | Mean Square | F      | Sig.              |
|--------|-------|------------|----------------|------|-------------|--------|-------------------|
| Korea  | 1     | Regression | 70.208         | 5    | 14.042      | 12.717 | .000 <sup>b</sup> |
|        |       | Residual   | 1292.937       | 1171 | 1.104       |        |                   |
|        |       | Total      | 1363.146       | 1176 |             |        |                   |
| Canada | 1     | Regression | 254.135        | 5    | 50.827      | 32.433 | .000 <sup>c</sup> |
|        |       | Residual   | 1024.921       | 654  | 1.567       |        |                   |
|        |       | Total      | 1279.056       | 659  |             |        |                   |

a. Dependent Variable: fear

b. Predictors: (Constant), openness, neuroticism, agreeable, conscientiousness, extraversion

c. Predictors: (Constant), openness, conscientiousness, extraversion, agreeable, neuroticism

### Coefficients<sup>a</sup>

| Nation | Model |                   | Unstandardized Coefficients |            | Standardized Coefficients | t      |
|--------|-------|-------------------|-----------------------------|------------|---------------------------|--------|
|        |       |                   | B                           | Std. Error | Beta                      |        |
| Korea  | 1     | (Constant)        | 3.419                       | .295       |                           | 11.591 |
|        |       | extraversion      | -.048                       | .050       | -.032                     | -.969  |
|        |       | agreeable         | -.179                       | .056       | -.106                     | -3.201 |
|        |       | conscientiousness | -.085                       | .046       | -.055                     | -1.843 |
|        |       | neuroticism       | .223                        | .046       | .141                      | 4.840  |
|        |       | openness          | -.078                       | .048       | -.048                     | -1.603 |
| Canada | 1     | (Constant)        | 4.005                       | .437       |                           | 9.163  |
|        |       | extraversion      | -.179                       | .054       | -.126                     | -3.338 |
|        |       | agreeable         | -.326                       | .065       | -.190                     | -5.003 |
|        |       | conscientiousness | -.181                       | .062       | -.111                     | -2.915 |
|        |       | neuroticism       | .351                        | .058       | .232                      | 6.058  |
|        |       | openness          | -.038                       | .065       | -.021                     | -.579  |

### Coefficients<sup>a</sup>

| Nation | Model |                   | Sig. | 95.0% Confidence Interval for B |             | Correlations |
|--------|-------|-------------------|------|---------------------------------|-------------|--------------|
|        |       |                   |      | Lower Bound                     | Upper Bound | Zero-order   |
| Korea  | 1     | (Constant)        | .000 | 2.840                           | 3.997       |              |
|        |       | extraversion      | .333 | -.146                           | .049        | -.104        |
|        |       | agreeable         | .001 | -.289                           | -.069       | -.143        |
|        |       | conscientiousness | .066 | -.175                           | .005        | -.111        |
|        |       | neuroticism       | .000 | .132                            | .313        | .160         |
|        |       | openness          | .109 | -.173                           | .017        | -.094        |
| Canada | 1     | (Constant)        | .000 | 3.147                           | 4.863       |              |
|        |       | extraversion      | .001 | -.284                           | -.074       | -.261        |
|        |       | agreeable         | .000 | -.454                           | -.198       | -.298        |
|        |       | conscientiousness | .004 | -.303                           | -.059       | -.255        |
|        |       | neuroticism       | .000 | .238                            | .465        | .339         |
|        |       | openness          | .563 | -.165                           | .090        | -.114        |

### Coefficients<sup>a</sup>

| Nation | Model |                   | Correlations |       | Collinearity Statistics |       |
|--------|-------|-------------------|--------------|-------|-------------------------|-------|
|        |       |                   | Partial      | Part  | Tolerance               | VIF   |
| Korea  | 1     | (Constant)        |              |       |                         |       |
|        |       | extraversion      | -.028        | -.028 | .739                    | 1.353 |
|        |       | agreeable         | -.093        | -.091 | .744                    | 1.344 |
|        |       | conscientiousness | -.054        | -.052 | .914                    | 1.094 |
|        |       | neuroticism       | .140         | .138  | .953                    | 1.049 |
|        |       | openness          | -.047        | -.046 | .918                    | 1.089 |
| Canada | 1     | (Constant)        |              |       |                         |       |
|        |       | extraversion      | -.129        | -.117 | .865                    | 1.156 |
|        |       | agreeable         | -.192        | -.175 | .847                    | 1.180 |
|        |       | conscientiousness | -.113        | -.102 | .851                    | 1.175 |
|        |       | neuroticism       | .231         | .212  | .834                    | 1.198 |
|        |       | openness          | -.023        | -.020 | .934                    | 1.070 |

a. Dependent Variable: fear

### Collinearity Diagnostics<sup>a</sup>

| Nation | Model | Dimension | Eigenvalue | Condition Index | Variance Proportions |              |
|--------|-------|-----------|------------|-----------------|----------------------|--------------|
|        |       |           |            |                 | (Constant)           | extraversion |
| Korea  | 1     | 1         | 5.830      | 1.000           | .00                  | .00          |
|        |       | 2         | .064       | 9.551           | .00                  | .12          |
|        |       | 3         | .047       | 11.186          | .01                  | .38          |
|        |       | 4         | .028       | 14.317          | .00                  | .01          |
|        |       | 5         | .023       | 16.050          | .00                  | .48          |
|        |       | 6         | .009       | 26.051          | .99                  | .00          |
| Canada | 1     | 1         | 5.709      | 1.000           | .00                  | .00          |
|        |       | 2         | .137       | 6.465           | .00                  | .27          |
|        |       | 3         | .072       | 8.933           | .00                  | .64          |
|        |       | 4         | .041       | 11.775          | .00                  | .03          |
|        |       | 5         | .031       | 13.511          | .00                  | .03          |
|        |       | 6         | .010       | 23.848          | 1.00                 | .03          |

## Collinearity Diagnostics<sup>a</sup>

| Nation | Model | Dimension | Variance Proportions |                   |             |          |
|--------|-------|-----------|----------------------|-------------------|-------------|----------|
|        |       |           | agreeable            | conscientiousness | neuroticism | openness |
| Korea  | 1     | 1         | .00                  | .00               | .00         | .00      |
|        |       | 2         | .02                  | .02               | .57         | .00      |
|        |       | 3         | .03                  | .26               | .05         | .08      |
|        |       | 4         | .00                  | .36               | .01         | .77      |
|        |       | 5         | .82                  | .05               | .02         | .03      |
|        |       | 6         | .13                  | .31               | .35         | .12      |
| Canada | 1     | 1         | .00                  | .00               | .00         | .00      |
|        |       | 2         | .00                  | .01               | .33         | .00      |
|        |       | 3         | .02                  | .18               | .17         | .02      |
|        |       | 4         | .02                  | .37               | .06         | .59      |
|        |       | 5         | .86                  | .12               | .00         | .23      |
|        |       | 6         | .09                  | .32               | .43         | .15      |

a. Dependent Variable: fear

REGRESSION

/MISSING LISTWISE

/STATISTICS COEFF OUTS CI(95) R ANOVA COLLIN TOL ZPP

/CRITERIA=PIN(.05) POUT(.10)

/NOORIGIN

/DEPENDENT transformative

/METHOD=ENTER extraversion agreeable conscientiousness neuroticism openne

ss.

## Regression

## Notes

|                        |                                                  |                                                                                                                                                                                                                                                                        |
|------------------------|--------------------------------------------------|------------------------------------------------------------------------------------------------------------------------------------------------------------------------------------------------------------------------------------------------------------------------|
| Output Created         |                                                  | 20-MAY-2019 12:21:27                                                                                                                                                                                                                                                   |
| Comments               |                                                  |                                                                                                                                                                                                                                                                        |
| Input                  | Data                                             | C:\Users\1\Desktop\korea<br>cnada study\merge korea<br>canada\final.sav                                                                                                                                                                                                |
|                        | Active Dataset                                   | DataSet1                                                                                                                                                                                                                                                               |
|                        | Filter                                           | <none>                                                                                                                                                                                                                                                                 |
|                        | Weight                                           | <none>                                                                                                                                                                                                                                                                 |
|                        | Split File                                       | Nation                                                                                                                                                                                                                                                                 |
|                        | N of Rows in Working Data<br>File                | 1837                                                                                                                                                                                                                                                                   |
| Missing Value Handling | Definition of Missing                            | User-defined missing<br>values are treated as<br>missing.                                                                                                                                                                                                              |
|                        | Cases Used                                       | Statistics are based on<br>cases with no missing<br>values for any variable<br>used.                                                                                                                                                                                   |
| Syntax                 |                                                  | REGRESSION<br>/MISSING LISTWISE<br>/STATISTICS COEFF<br>OUTS CI(95) R ANOVA<br>COLLIN TOL ZPP<br>/CRITERIA=PIN(.05)<br>POUT(.10)<br>/NOORIGIN<br>/DEPENDENT<br>transformative<br>/METHOD=ENTER<br>extraversion agreeable<br>conscientiousness<br>neuroticism openness. |
| Resources              | Processor Time                                   | 00:00:00.03                                                                                                                                                                                                                                                            |
|                        | Elapsed Time                                     | 00:00:00.05                                                                                                                                                                                                                                                            |
|                        | Memory Required                                  | 11408 bytes                                                                                                                                                                                                                                                            |
|                        | Additional Memory<br>Required for Residual Plots | 0 bytes                                                                                                                                                                                                                                                                |

### Variables Entered/Removed<sup>a</sup>

| Nation | Model | Variables Entered                                                              | Variables Removed | Method |
|--------|-------|--------------------------------------------------------------------------------|-------------------|--------|
| Korea  | 1     | openness, neuroticism, agreeable, conscientiousness, extraversion <sup>b</sup> | .                 | Enter  |
| Canada | 1     | openness, conscientiousness, extraversion, agreeable, neuroticism <sup>b</sup> | .                 | Enter  |

a. Dependent Variable: transformative

b. All requested variables entered.

### Model Summary

| Nation | Model | R                 | R Square | Adjusted R Square | Std. Error of the Estimate |
|--------|-------|-------------------|----------|-------------------|----------------------------|
| Korea  | 1     | .117 <sup>a</sup> | .014     | .009              | 1.13353                    |
| Canada | 1     | .180 <sup>b</sup> | .032     | .025              | 1.25511                    |

a. Predictors: (Constant), openness, neuroticism, agreeable, conscientiousness, extraversion

b. Predictors: (Constant), openness, conscientiousness, extraversion, agreeable, neuroticism

### ANOVA<sup>a</sup>

| Nation | Model |            | Sum of Squares | df   | Mean Square | F     | Sig.              |
|--------|-------|------------|----------------|------|-------------|-------|-------------------|
| Korea  | 1     | Regression | 20.726         | 5    | 4.145       | 3.226 | .007 <sup>b</sup> |
|        |       | Residual   | 1504.606       | 1171 | 1.285       |       |                   |
|        |       | Total      | 1525.332       | 1176 |             |       |                   |
| Canada | 1     | Regression | 34.451         | 5    | 6.890       | 4.374 | .001 <sup>c</sup> |
|        |       | Residual   | 1030.254       | 654  | 1.575       |       |                   |
|        |       | Total      | 1064.704       | 659  |             |       |                   |

a. Dependent Variable: transformative

b. Predictors: (Constant), openness, neuroticism, agreeable, conscientiousness, extraversion

c. Predictors: (Constant), openness, conscientiousness, extraversion, agreeable, neuroticism

### Coefficients<sup>a</sup>

| Nation | Model |                   | Unstandardized Coefficients |            | Standardized Coefficients | t      |
|--------|-------|-------------------|-----------------------------|------------|---------------------------|--------|
|        |       |                   | B                           | Std. Error | Beta                      |        |
| Korea  | 1     | (Constant)        | 3.180                       | .318       |                           | 9.995  |
|        |       | extraversion      | -.032                       | .054       | -.020                     | -.596  |
|        |       | agreeable         | .174                        | .060       | .097                      | 2.880  |
|        |       | conscientiousness | .094                        | .050       | .058                      | 1.896  |
|        |       | neuroticism       | .091                        | .050       | .055                      | 1.840  |
|        |       | openness          | -.083                       | .052       | -.048                     | -1.580 |
| Canada | 1     | (Constant)        | 3.504                       | .438       |                           | 7.997  |
|        |       | extraversion      | -.010                       | .054       | -.008                     | -.193  |
|        |       | agreeable         | .198                        | .065       | .127                      | 3.028  |
|        |       | conscientiousness | -.184                       | .062       | -.123                     | -2.950 |
|        |       | neuroticism       | .075                        | .058       | .055                      | 1.296  |
|        |       | openness          | .072                        | .065       | .044                      | 1.105  |

### Coefficients<sup>a</sup>

| Nation | Model |                   | Sig. | 95.0% Confidence Interval for B |             | Correlations |
|--------|-------|-------------------|------|---------------------------------|-------------|--------------|
|        |       |                   |      | Lower Bound                     | Upper Bound | Zero-order   |
| Korea  | 1     | (Constant)        | .000 | 2.556                           | 3.804       |              |
|        |       | extraversion      | .551 | -.137                           | .073        | .024         |
|        |       | agreeable         | .004 | .055                            | .292        | .082         |
|        |       | conscientiousness | .058 | -.003                           | .192        | .046         |
|        |       | neuroticism       | .066 | -.006                           | .189        | .042         |
|        |       | openness          | .114 | -.185                           | .020        | -.025        |
| Canada | 1     | (Constant)        | .000 | 2.644                           | 4.364       |              |
|        |       | extraversion      | .847 | -.116                           | .095        | .002         |
|        |       | agreeable         | .003 | .070                            | .326        | .097         |
|        |       | conscientiousness | .003 | -.306                           | -.062       | -.111        |
|        |       | neuroticism       | .195 | -.039                           | .190        | .073         |
|        |       | openness          | .270 | -.056                           | .200        | .058         |

### Coefficients<sup>a</sup>

| Nation | Model |                   | Correlations |       | Collinearity Statistics |       |
|--------|-------|-------------------|--------------|-------|-------------------------|-------|
|        |       |                   | Partial      | Part  | Tolerance               | VIF   |
| Korea  | 1     | (Constant)        |              |       |                         |       |
|        |       | extraversion      | -.017        | -.017 | .739                    | 1.353 |
|        |       | agreeable         | .084         | .084  | .744                    | 1.344 |
|        |       | conscientiousness | .055         | .055  | .914                    | 1.094 |
|        |       | neuroticism       | .054         | .053  | .953                    | 1.049 |
|        |       | openness          | -.046        | -.046 | .918                    | 1.089 |
| Canada | 1     | (Constant)        |              |       |                         |       |
|        |       | extraversion      | -.008        | -.007 | .865                    | 1.156 |
|        |       | agreeable         | .118         | .116  | .847                    | 1.180 |
|        |       | conscientiousness | -.115        | -.113 | .851                    | 1.175 |
|        |       | neuroticism       | .051         | .050  | .834                    | 1.198 |
|        |       | openness          | .043         | .043  | .934                    | 1.070 |

a. Dependent Variable: transformative

### Collinearity Diagnostics<sup>a</sup>

| Nation | Model | Dimension | Eigenvalue | Condition Index | Variance Proportions |              |
|--------|-------|-----------|------------|-----------------|----------------------|--------------|
|        |       |           |            |                 | (Constant)           | extraversion |
| Korea  | 1     | 1         | 5.830      | 1.000           | .00                  | .00          |
|        |       | 2         | .064       | 9.551           | .00                  | .12          |
|        |       | 3         | .047       | 11.186          | .01                  | .38          |
|        |       | 4         | .028       | 14.317          | .00                  | .01          |
|        |       | 5         | .023       | 16.050          | .00                  | .48          |
|        |       | 6         | .009       | 26.051          | .99                  | .00          |
| Canada | 1     | 1         | 5.709      | 1.000           | .00                  | .00          |
|        |       | 2         | .137       | 6.465           | .00                  | .27          |
|        |       | 3         | .072       | 8.933           | .00                  | .64          |
|        |       | 4         | .041       | 11.775          | .00                  | .03          |
|        |       | 5         | .031       | 13.511          | .00                  | .03          |
|        |       | 6         | .010       | 23.848          | 1.00                 | .03          |



## Collinearity Diagnostics<sup>a</sup>

| Nation | Model | Dimension | Variance Proportions |                   |             |          |
|--------|-------|-----------|----------------------|-------------------|-------------|----------|
|        |       |           | agreeable            | conscientiousness | neuroticism | openness |
| Korea  | 1     | 1         | .00                  | .00               | .00         | .00      |
|        |       | 2         | .02                  | .02               | .57         | .00      |
|        |       | 3         | .03                  | .26               | .05         | .08      |
|        |       | 4         | .00                  | .36               | .01         | .77      |
|        |       | 5         | .82                  | .05               | .02         | .03      |
|        |       | 6         | .13                  | .31               | .35         | .12      |
| Canada | 1     | 1         | .00                  | .00               | .00         | .00      |
|        |       | 2         | .00                  | .01               | .33         | .00      |
|        |       | 3         | .02                  | .18               | .17         | .02      |
|        |       | 4         | .02                  | .37               | .06         | .59      |
|        |       | 5         | .86                  | .12               | .00         | .23      |
|        |       | 6         | .09                  | .32               | .43         | .15      |

a. Dependent Variable: transformative

REGRESSION

/MISSING LISTWISE

/STATISTICS COEFF OUTS CI(95) R ANOVA COLLIN TOL ZPP

/CRITERIA=PIN(.05) POUT(.10)

/NOORIGIN

/DEPENDENT fragility

/METHOD=ENTER extraversion agreeable conscientiousness neuroticism openne

ss.

## Regression

## Notes

|                        |                                                  |                                                                                                                                                                                                                                                                |
|------------------------|--------------------------------------------------|----------------------------------------------------------------------------------------------------------------------------------------------------------------------------------------------------------------------------------------------------------------|
| Output Created         |                                                  | 20-MAY-2019 12:21:34                                                                                                                                                                                                                                           |
| Comments               |                                                  |                                                                                                                                                                                                                                                                |
| Input                  | Data                                             | C:\Users\1\Desktop\korea<br>cnada study\merge korea<br>canada\final.sav                                                                                                                                                                                        |
|                        | Active Dataset                                   | DataSet1                                                                                                                                                                                                                                                       |
|                        | Filter                                           | <none>                                                                                                                                                                                                                                                         |
|                        | Weight                                           | <none>                                                                                                                                                                                                                                                         |
|                        | Split File                                       | Nation                                                                                                                                                                                                                                                         |
|                        | N of Rows in Working Data<br>File                | 1837                                                                                                                                                                                                                                                           |
| Missing Value Handling | Definition of Missing                            | User-defined missing<br>values are treated as<br>missing.                                                                                                                                                                                                      |
|                        | Cases Used                                       | Statistics are based on<br>cases with no missing<br>values for any variable<br>used.                                                                                                                                                                           |
| Syntax                 |                                                  | REGRESSION<br>/MISSING LISTWISE<br>/STATISTICS COEFF<br>OUTS CI(95) R ANOVA<br>COLLIN TOL ZPP<br>/CRITERIA=PIN(.05)<br>POUT(.10)<br>/NOORIGIN<br>/DEPENDENT fragility<br>/METHOD=ENTER<br>extraversion agreeable<br>conscientiousness<br>neuroticism openness. |
| Resources              | Processor Time                                   | 00:00:00.05                                                                                                                                                                                                                                                    |
|                        | Elapsed Time                                     | 00:00:00.04                                                                                                                                                                                                                                                    |
|                        | Memory Required                                  | 11408 bytes                                                                                                                                                                                                                                                    |
|                        | Additional Memory<br>Required for Residual Plots | 0 bytes                                                                                                                                                                                                                                                        |

### Variables Entered/Removed<sup>a</sup>

| Nation | Model | Variables Entered                                                              | Variables Removed | Method |
|--------|-------|--------------------------------------------------------------------------------|-------------------|--------|
| Korea  | 1     | openness, neuroticism, agreeable, conscientiousness, extraversion <sup>b</sup> | .                 | Enter  |
| Canada | 1     | openness, conscientiousness, extraversion, agreeable, neuroticism <sup>b</sup> | .                 | Enter  |

a. Dependent Variable: fragility

b. All requested variables entered.

### Model Summary

| Nation | Model | R                 | R Square | Adjusted R Square | Std. Error of the Estimate |
|--------|-------|-------------------|----------|-------------------|----------------------------|
| Korea  | 1     | .180 <sup>a</sup> | .032     | .028              | 1.04611                    |
| Canada | 1     | .329 <sup>b</sup> | .108     | .101              | 1.23220                    |

a. Predictors: (Constant), openness, neuroticism, agreeable, conscientiousness, extraversion

b. Predictors: (Constant), openness, conscientiousness, extraversion, agreeable, neuroticism

### ANOVA<sup>a</sup>

| Nation | Model |            | Sum of Squares | df   | Mean Square | F      | Sig.              |
|--------|-------|------------|----------------|------|-------------|--------|-------------------|
| Korea  | 1     | Regression | 42.694         | 5    | 8.539       | 7.803  | .000 <sup>b</sup> |
|        |       | Residual   | 1281.467       | 1171 | 1.094       |        |                   |
|        |       | Total      | 1324.162       | 1176 |             |        |                   |
| Canada | 1     | Regression | 120.284        | 5    | 24.057      | 15.844 | .000 <sup>c</sup> |
|        |       | Residual   | 992.986        | 654  | 1.518       |        |                   |
|        |       | Total      | 1113.271       | 659  |             |        |                   |

a. Dependent Variable: fragility

b. Predictors: (Constant), openness, neuroticism, agreeable, conscientiousness, extraversion

c. Predictors: (Constant), openness, conscientiousness, extraversion, agreeable, neuroticism

### Coefficients<sup>a</sup>

| Nation | Model |                   | Unstandardized Coefficients |            | Standardized Coefficients | t      |
|--------|-------|-------------------|-----------------------------|------------|---------------------------|--------|
|        |       |                   | B                           | Std. Error | Beta                      |        |
| Korea  | 1     | (Constant)        | 4.160                       | .294       |                           | 14.169 |
|        |       | extraversion      | -.154                       | .050       | -.104                     | -3.114 |
|        |       | agreeable         | .044                        | .056       | .026                      | .787   |
|        |       | conscientiousness | .053                        | .046       | .034                      | 1.146  |
|        |       | neuroticism       | .247                        | .046       | .158                      | 5.381  |
|        |       | openness          | .060                        | .048       | .037                      | 1.248  |
| Canada | 1     | (Constant)        | 4.505                       | .430       |                           | 10.472 |
|        |       | extraversion      | -.189                       | .053       | -.142                     | -3.580 |
|        |       | agreeable         | .012                        | .064       | .008                      | .192   |
|        |       | conscientiousness | -.017                       | .061       | -.011                     | -.272  |
|        |       | neuroticism       | .354                        | .057       | .250                      | 6.190  |
|        |       | openness          | -.072                       | .064       | -.043                     | -1.127 |

### Coefficients<sup>a</sup>

| Nation | Model |                   | Sig. | 95.0% Confidence Interval for B |             | Correlations |
|--------|-------|-------------------|------|---------------------------------|-------------|--------------|
|        |       |                   |      | Lower Bound                     | Upper Bound | Zero-order   |
| Korea  | 1     | (Constant)        | .000 | 3.584                           | 4.736       |              |
|        |       | extraversion      | .002 | -.252                           | -.057       | -.081        |
|        |       | agreeable         | .432 | -.066                           | .153        | -.020        |
|        |       | conscientiousness | .252 | -.037                           | .142        | -.002        |
|        |       | neuroticism       | .000 | .157                            | .337        | .150         |
|        |       | openness          | .212 | -.034                           | .155        | .018         |
| Canada | 1     | (Constant)        | .000 | 3.660                           | 5.350       |              |
|        |       | extraversion      | .000 | -.292                           | -.085       | -.214        |
|        |       | agreeable         | .848 | -.114                           | .138        | -.090        |
|        |       | conscientiousness | .786 | -.137                           | .104        | -.121        |
|        |       | neuroticism       | .000 | .241                            | .466        | .293         |
|        |       | openness          | .260 | -.198                           | .054        | -.086        |

### Coefficients<sup>a</sup>

| Nation | Model |                   | Correlations |       | Collinearity Statistics |       |
|--------|-------|-------------------|--------------|-------|-------------------------|-------|
|        |       |                   | Partial      | Part  | Tolerance               | VIF   |
| Korea  | 1     | (Constant)        |              |       |                         |       |
|        |       | extraversion      | -.091        | -.090 | .739                    | 1.353 |
|        |       | agreeable         | .023         | .023  | .744                    | 1.344 |
|        |       | conscientiousness | .033         | .033  | .914                    | 1.094 |
|        |       | neuroticism       | .155         | .155  | .953                    | 1.049 |
|        |       | openness          | .036         | .036  | .918                    | 1.089 |
| Canada | 1     | (Constant)        |              |       |                         |       |
|        |       | extraversion      | -.139        | -.132 | .865                    | 1.156 |
|        |       | agreeable         | .008         | .007  | .847                    | 1.180 |
|        |       | conscientiousness | -.011        | -.010 | .851                    | 1.175 |
|        |       | neuroticism       | .235         | .229  | .834                    | 1.198 |
|        |       | openness          | -.044        | -.042 | .934                    | 1.070 |

a. Dependent Variable: fragility

### Collinearity Diagnostics<sup>a</sup>

| Nation | Model | Dimension | Eigenvalue | Condition Index | Variance Proportions |              |
|--------|-------|-----------|------------|-----------------|----------------------|--------------|
|        |       |           |            |                 | (Constant)           | extraversion |
| Korea  | 1     | 1         | 5.830      | 1.000           | .00                  | .00          |
|        |       | 2         | .064       | 9.551           | .00                  | .12          |
|        |       | 3         | .047       | 11.186          | .01                  | .38          |
|        |       | 4         | .028       | 14.317          | .00                  | .01          |
|        |       | 5         | .023       | 16.050          | .00                  | .48          |
|        |       | 6         | .009       | 26.051          | .99                  | .00          |
| Canada | 1     | 1         | 5.709      | 1.000           | .00                  | .00          |
|        |       | 2         | .137       | 6.465           | .00                  | .27          |
|        |       | 3         | .072       | 8.933           | .00                  | .64          |
|        |       | 4         | .041       | 11.775          | .00                  | .03          |
|        |       | 5         | .031       | 13.511          | .00                  | .03          |
|        |       | 6         | .010       | 23.848          | 1.00                 | .03          |

## Collinearity Diagnostics<sup>a</sup>

| Nation | Model | Dimension | Variance Proportions |                   |             |          |
|--------|-------|-----------|----------------------|-------------------|-------------|----------|
|        |       |           | agreeable            | conscientiousness | neuroticism | openness |
| Korea  | 1     | 1         | .00                  | .00               | .00         | .00      |
|        |       | 2         | .02                  | .02               | .57         | .00      |
|        |       | 3         | .03                  | .26               | .05         | .08      |
|        |       | 4         | .00                  | .36               | .01         | .77      |
|        |       | 5         | .82                  | .05               | .02         | .03      |
|        |       | 6         | .13                  | .31               | .35         | .12      |
| Canada | 1     | 1         | .00                  | .00               | .00         | .00      |
|        |       | 2         | .00                  | .01               | .33         | .00      |
|        |       | 3         | .02                  | .18               | .17         | .02      |
|        |       | 4         | .02                  | .37               | .06         | .59      |
|        |       | 5         | .86                  | .12               | .00         | .23      |
|        |       | 6         | .09                  | .32               | .43         | .15      |

a. Dependent Variable: fragility

REGRESSION

/MISSING LISTWISE

/STATISTICS COEFF OUTS CI(95) R ANOVA COLLIN TOL ZPP

/CRITERIA=PIN(.05) POUT(.10)

/NOORIGIN

/DEPENDENT valuing

/METHOD=ENTER extraversion agreeable conscientiousness neuroticism openne

ss.

## Regression

## Notes

|                        |                                                  |                                                                                                                                                                                                                                                              |
|------------------------|--------------------------------------------------|--------------------------------------------------------------------------------------------------------------------------------------------------------------------------------------------------------------------------------------------------------------|
| Output Created         |                                                  | 20-MAY-2019 12:21:41                                                                                                                                                                                                                                         |
| Comments               |                                                  |                                                                                                                                                                                                                                                              |
| Input                  | Data                                             | C:\Users\1\Desktop\korea<br>cnada study\merge korea<br>canada\final.sav                                                                                                                                                                                      |
|                        | Active Dataset                                   | DataSet1                                                                                                                                                                                                                                                     |
|                        | Filter                                           | <none>                                                                                                                                                                                                                                                       |
|                        | Weight                                           | <none>                                                                                                                                                                                                                                                       |
|                        | Split File                                       | Nation                                                                                                                                                                                                                                                       |
|                        | N of Rows in Working Data<br>File                | 1837                                                                                                                                                                                                                                                         |
| Missing Value Handling | Definition of Missing                            | User-defined missing<br>values are treated as<br>missing.                                                                                                                                                                                                    |
|                        | Cases Used                                       | Statistics are based on<br>cases with no missing<br>values for any variable<br>used.                                                                                                                                                                         |
| Syntax                 |                                                  | REGRESSION<br>/MISSING LISTWISE<br>/STATISTICS COEFF<br>OUTS CI(95) R ANOVA<br>COLLIN TOL ZPP<br>/CRITERIA=PIN(.05)<br>POUT(.10)<br>/NOORIGIN<br>/DEPENDENT valuing<br>/METHOD=ENTER<br>extraversion agreeable<br>conscientiousness<br>neuroticism openness. |
| Resources              | Processor Time                                   | 00:00:00.02                                                                                                                                                                                                                                                  |
|                        | Elapsed Time                                     | 00:00:00.03                                                                                                                                                                                                                                                  |
|                        | Memory Required                                  | 11408 bytes                                                                                                                                                                                                                                                  |
|                        | Additional Memory<br>Required for Residual Plots | 0 bytes                                                                                                                                                                                                                                                      |

### Variables Entered/Removed<sup>a</sup>

| Nation | Model | Variables Entered                                                              | Variables Removed | Method |
|--------|-------|--------------------------------------------------------------------------------|-------------------|--------|
| Korea  | 1     | openness, neuroticism, agreeable, conscientiousness, extraversion <sup>b</sup> | .                 | Enter  |
| Canada | 1     | openness, conscientiousness, extraversion, agreeable, neuroticism <sup>b</sup> | .                 | Enter  |

a. Dependent Variable: valuing

b. All requested variables entered.

### Model Summary

| Nation | Model | R                 | R Square | Adjusted R Square | Std. Error of the Estimate |
|--------|-------|-------------------|----------|-------------------|----------------------------|
| Korea  | 1     | .262 <sup>a</sup> | .069     | .065              | .69078                     |
| Canada | 1     | .388 <sup>b</sup> | .151     | .144              | .91045                     |

a. Predictors: (Constant), openness, neuroticism, agreeable, conscientiousness, extraversion

b. Predictors: (Constant), openness, conscientiousness, extraversion, agreeable, neuroticism

### ANOVA<sup>a</sup>

| Nation | Model |            | Sum of Squares | df   | Mean Square | F      | Sig.              |
|--------|-------|------------|----------------|------|-------------|--------|-------------------|
| Korea  | 1     | Regression | 41.279         | 5    | 8.256       | 17.301 | .000 <sup>b</sup> |
|        |       | Residual   | 558.774        | 1171 | .477        |        |                   |
|        |       | Total      | 600.053        | 1176 |             |        |                   |
| Canada | 1     | Regression | 96.365         | 5    | 19.273      | 23.251 | .000 <sup>c</sup> |
|        |       | Residual   | 542.119        | 654  | .829        |        |                   |
|        |       | Total      | 638.484        | 659  |             |        |                   |

a. Dependent Variable: valuing

b. Predictors: (Constant), openness, neuroticism, agreeable, conscientiousness, extraversion

c. Predictors: (Constant), openness, conscientiousness, extraversion, agreeable, neuroticism



### Coefficients<sup>a</sup>

| Nation | Model |                   | Unstandardized Coefficients |            | Standardized Coefficients | t      |
|--------|-------|-------------------|-----------------------------|------------|---------------------------|--------|
|        |       |                   | B                           | Std. Error | Beta                      |        |
| Korea  | 1     | (Constant)        | 3.677                       | .194       |                           | 18.963 |
|        |       | extraversion      | .019                        | .033       | .019                      | .566   |
|        |       | agreeable         | -.013                       | .037       | -.012                     | -.354  |
|        |       | conscientiousness | .082                        | .030       | .080                      | 2.726  |
|        |       | neuroticism       | .278                        | .030       | .265                      | 9.181  |
|        |       | openness          | -.030                       | .032       | -.028                     | -.944  |
| Canada | 1     | (Constant)        | 3.804                       | .318       |                           | 11.966 |
|        |       | extraversion      | .037                        | .039       | .037                      | .947   |
|        |       | agreeable         | -.084                       | .047       | -.069                     | -1.774 |
|        |       | conscientiousness | -.071                       | .045       | -.062                     | -1.579 |
|        |       | neuroticism       | .367                        | .042       | .343                      | 8.703  |
|        |       | openness          | -.062                       | .047       | -.049                     | -1.316 |

### Coefficients<sup>a</sup>

| Nation | Model |                   | Sig. | 95.0% Confidence Interval for B |             | Correlations |
|--------|-------|-------------------|------|---------------------------------|-------------|--------------|
|        |       |                   |      | Lower Bound                     | Upper Bound | Zero-order   |
| Korea  | 1     | (Constant)        | .000 | 3.296                           | 4.057       |              |
|        |       | extraversion      | .572 | -.046                           | .083        | .013         |
|        |       | agreeable         | .723 | -.085                           | .059        | -.008        |
|        |       | conscientiousness | .007 | .023                            | .142        | .019         |
|        |       | neuroticism       | .000 | .218                            | .337        | .250         |
|        |       | openness          | .345 | -.093                           | .032        | -.026        |
| Canada | 1     | (Constant)        | .000 | 3.179                           | 4.428       |              |
|        |       | extraversion      | .344 | -.040                           | .113        | -.090        |
|        |       | agreeable         | .077 | -.177                           | .009        | -.146        |
|        |       | conscientiousness | .115 | -.160                           | .017        | -.194        |
|        |       | neuroticism       | .000 | .284                            | .450        | .372         |
|        |       | openness          | .189 | -.155                           | .031        | -.093        |

### Coefficients<sup>a</sup>

| Nation | Model |                   | Correlations |       | Collinearity Statistics |       |
|--------|-------|-------------------|--------------|-------|-------------------------|-------|
|        |       |                   | Partial      | Part  | Tolerance               | VIF   |
| Korea  | 1     | (Constant)        |              |       |                         |       |
|        |       | extraversion      | .017         | .016  | .739                    | 1.353 |
|        |       | agreeable         | -.010        | -.010 | .744                    | 1.344 |
|        |       | conscientiousness | .079         | .077  | .914                    | 1.094 |
|        |       | neuroticism       | .259         | .259  | .953                    | 1.049 |
|        |       | openness          | -.028        | -.027 | .918                    | 1.089 |
| Canada | 1     | (Constant)        |              |       |                         |       |
|        |       | extraversion      | .037         | .034  | .865                    | 1.156 |
|        |       | agreeable         | -.069        | -.064 | .847                    | 1.180 |
|        |       | conscientiousness | -.062        | -.057 | .851                    | 1.175 |
|        |       | neuroticism       | .322         | .314  | .834                    | 1.198 |
|        |       | openness          | -.051        | -.047 | .934                    | 1.070 |

a. Dependent Variable: valuing

### Collinearity Diagnostics<sup>a</sup>

| Nation | Model | Dimension | Eigenvalue | Condition Index | Variance Proportions |              |
|--------|-------|-----------|------------|-----------------|----------------------|--------------|
|        |       |           |            |                 | (Constant)           | extraversion |
| Korea  | 1     | 1         | 5.830      | 1.000           | .00                  | .00          |
|        |       | 2         | .064       | 9.551           | .00                  | .12          |
|        |       | 3         | .047       | 11.186          | .01                  | .38          |
|        |       | 4         | .028       | 14.317          | .00                  | .01          |
|        |       | 5         | .023       | 16.050          | .00                  | .48          |
|        |       | 6         | .009       | 26.051          | .99                  | .00          |
| Canada | 1     | 1         | 5.709      | 1.000           | .00                  | .00          |
|        |       | 2         | .137       | 6.465           | .00                  | .27          |
|        |       | 3         | .072       | 8.933           | .00                  | .64          |
|        |       | 4         | .041       | 11.775          | .00                  | .03          |
|        |       | 5         | .031       | 13.511          | .00                  | .03          |
|        |       | 6         | .010       | 23.848          | 1.00                 | .03          |

## Collinearity Diagnostics<sup>a</sup>

| Nation | Model | Dimension | Variance Proportions |                   |             |          |
|--------|-------|-----------|----------------------|-------------------|-------------|----------|
|        |       |           | agreeable            | conscientiousness | neuroticism | openness |
| Korea  | 1     | 1         | .00                  | .00               | .00         | .00      |
|        |       | 2         | .02                  | .02               | .57         | .00      |
|        |       | 3         | .03                  | .26               | .05         | .08      |
|        |       | 4         | .00                  | .36               | .01         | .77      |
|        |       | 5         | .82                  | .05               | .02         | .03      |
|        |       | 6         | .13                  | .31               | .35         | .12      |
| Canada | 1     | 1         | .00                  | .00               | .00         | .00      |
|        |       | 2         | .00                  | .01               | .33         | .00      |
|        |       | 3         | .02                  | .18               | .17         | .02      |
|        |       | 4         | .02                  | .37               | .06         | .59      |
|        |       | 5         | .86                  | .12               | .00         | .23      |
|        |       | 6         | .09                  | .32               | .43         | .15      |

a. Dependent Variable: valuing

REGRESSION

/MISSING LISTWISE

/STATISTICS COEFF OUTS CI(95) R ANOVA COLLIN TOL ZPP

/CRITERIA=PIN(.05) POUT(.10)

/NOORIGIN

/DEPENDENT inflexibility

/METHOD=ENTER extraversion agreeable conscientiousness neuroticism openne

ss.

## Regression

## Notes

|                        |                                                  |                                                                                                                                                                                                                                                                    |
|------------------------|--------------------------------------------------|--------------------------------------------------------------------------------------------------------------------------------------------------------------------------------------------------------------------------------------------------------------------|
| Output Created         |                                                  | 20-MAY-2019 12:21:47                                                                                                                                                                                                                                               |
| Comments               |                                                  |                                                                                                                                                                                                                                                                    |
| Input                  | Data                                             | C:\Users\1\Desktop\korea<br>cnada study\merge korea<br>canada\final.sav                                                                                                                                                                                            |
|                        | Active Dataset                                   | DataSet1                                                                                                                                                                                                                                                           |
|                        | Filter                                           | <none>                                                                                                                                                                                                                                                             |
|                        | Weight                                           | <none>                                                                                                                                                                                                                                                             |
|                        | Split File                                       | Nation                                                                                                                                                                                                                                                             |
|                        | N of Rows in Working Data<br>File                | 1837                                                                                                                                                                                                                                                               |
| Missing Value Handling | Definition of Missing                            | User-defined missing<br>values are treated as<br>missing.                                                                                                                                                                                                          |
|                        | Cases Used                                       | Statistics are based on<br>cases with no missing<br>values for any variable<br>used.                                                                                                                                                                               |
| Syntax                 |                                                  | REGRESSION<br>/MISSING LISTWISE<br>/STATISTICS COEFF<br>OUTS CI(95) R ANOVA<br>COLLIN TOL ZPP<br>/CRITERIA=PIN(.05)<br>POUT(.10)<br>/NOORIGIN<br>/DEPENDENT inflexibility<br>/METHOD=ENTER<br>extraversion agreeable<br>conscientiousness<br>neuroticism openness. |
| Resources              | Processor Time                                   | 00:00:00.02                                                                                                                                                                                                                                                        |
|                        | Elapsed Time                                     | 00:00:00.03                                                                                                                                                                                                                                                        |
|                        | Memory Required                                  | 11408 bytes                                                                                                                                                                                                                                                        |
|                        | Additional Memory<br>Required for Residual Plots | 0 bytes                                                                                                                                                                                                                                                            |

### Variables Entered/Removed<sup>a</sup>

| Nation | Model | Variables Entered                                                              | Variables Removed | Method |
|--------|-------|--------------------------------------------------------------------------------|-------------------|--------|
| Korea  | 1     | openness, neuroticism, agreeable, conscientiousness, extraversion <sup>b</sup> | .                 | Enter  |
| Canada | 1     | openness, conscientiousness, extraversion, agreeable, neuroticism <sup>b</sup> | .                 | Enter  |

a. Dependent Variable: inflexibility

b. All requested variables entered.

### Model Summary

| Nation | Model | R                 | R Square | Adjusted R Square | Std. Error of the Estimate |
|--------|-------|-------------------|----------|-------------------|----------------------------|
| Korea  | 1     | .148 <sup>a</sup> | .022     | .018              | 1.05836                    |
| Canada | 1     | .267 <sup>b</sup> | .071     | .064              | 1.21450                    |

a. Predictors: (Constant), openness, neuroticism, agreeable, conscientiousness, extraversion

b. Predictors: (Constant), openness, conscientiousness, extraversion, agreeable, neuroticism

### ANOVA<sup>a</sup>

| Nation | Model |            | Sum of Squares | df   | Mean Square | F      | Sig.              |
|--------|-------|------------|----------------|------|-------------|--------|-------------------|
| Korea  | 1     | Regression | 29.538         | 5    | 5.908       | 5.274  | .000 <sup>b</sup> |
|        |       | Residual   | 1311.668       | 1171 | 1.120       |        |                   |
|        |       | Total      | 1341.206       | 1176 |             |        |                   |
| Canada | 1     | Regression | 73.825         | 5    | 14.765      | 10.010 | .000 <sup>c</sup> |
|        |       | Residual   | 964.658        | 654  | 1.475       |        |                   |
|        |       | Total      | 1038.483       | 659  |             |        |                   |

a. Dependent Variable: inflexibility

b. Predictors: (Constant), openness, neuroticism, agreeable, conscientiousness, extraversion

c. Predictors: (Constant), openness, conscientiousness, extraversion, agreeable, neuroticism

### Coefficients<sup>a</sup>

| Nation | Model |                   | Unstandardized Coefficients |            | Standardized Coefficients | t      |
|--------|-------|-------------------|-----------------------------|------------|---------------------------|--------|
|        |       |                   | B                           | Std. Error | Beta                      |        |
| Korea  | 1     | (Constant)        | 4.788                       | .297       |                           | 16.120 |
|        |       | extraversion      | -.027                       | .050       | -.018                     | -.530  |
|        |       | agreeable         | -.224                       | .056       | -.133                     | -3.978 |
|        |       | conscientiousness | -.026                       | .046       | -.017                     | -.568  |
|        |       | neuroticism       | -.013                       | .046       | -.008                     | -.275  |
|        |       | openness          | -.016                       | .049       | -.010                     | -.326  |
| Canada | 1     | (Constant)        | 5.408                       | .424       |                           | 12.755 |
|        |       | extraversion      | -.015                       | .052       | -.012                     | -.291  |
|        |       | agreeable         | -.334                       | .063       | -.216                     | -5.281 |
|        |       | conscientiousness | -.116                       | .060       | -.078                     | -1.917 |
|        |       | neuroticism       | -.144                       | .056       | -.106                     | -2.565 |
|        |       | openness          | -.113                       | .063       | -.070                     | -1.785 |

### Coefficients<sup>a</sup>

| Nation | Model |                   | Sig. | 95.0% Confidence Interval for B |             | Correlations |
|--------|-------|-------------------|------|---------------------------------|-------------|--------------|
|        |       |                   |      | Lower Bound                     | Upper Bound | Zero-order   |
| Korea  | 1     | (Constant)        | .000 | 4.206                           | 5.371       |              |
|        |       | extraversion      | .596 | -.125                           | .072        | -.088        |
|        |       | agreeable         | .000 | -.335                           | -.114       | -.146        |
|        |       | conscientiousness | .570 | -.117                           | .065        | -.035        |
|        |       | neuroticism       | .783 | -.104                           | .078        | .001         |
|        |       | openness          | .744 | -.112                           | .080        | -.043        |
| Canada | 1     | (Constant)        | .000 | 4.576                           | 6.241       |              |
|        |       | extraversion      | .771 | -.117                           | .087        | -.070        |
|        |       | agreeable         | .000 | -.458                           | -.210       | -.235        |
|        |       | conscientiousness | .056 | -.234                           | .003        | -.099        |
|        |       | neuroticism       | .011 | -.255                           | -.034       | -.031        |
|        |       | openness          | .075 | -.237                           | .011        | -.120        |

### Coefficients<sup>a</sup>

| Nation | Model |                   | Correlations |       | Collinearity Statistics |       |
|--------|-------|-------------------|--------------|-------|-------------------------|-------|
|        |       |                   | Partial      | Part  | Tolerance               | VIF   |
| Korea  | 1     | (Constant)        |              |       |                         |       |
|        |       | extraversion      | -.015        | -.015 | .739                    | 1.353 |
|        |       | agreeable         | -.115        | -.115 | .744                    | 1.344 |
|        |       | conscientiousness | -.017        | -.016 | .914                    | 1.094 |
|        |       | neuroticism       | -.008        | -.008 | .953                    | 1.049 |
|        |       | openness          | -.010        | -.009 | .918                    | 1.089 |
| Canada | 1     | (Constant)        |              |       |                         |       |
|        |       | extraversion      | -.011        | -.011 | .865                    | 1.156 |
|        |       | agreeable         | -.202        | -.199 | .847                    | 1.180 |
|        |       | conscientiousness | -.075        | -.072 | .851                    | 1.175 |
|        |       | neuroticism       | -.100        | -.097 | .834                    | 1.198 |
|        |       | openness          | -.070        | -.067 | .934                    | 1.070 |

a. Dependent Variable: inflexibility

### Collinearity Diagnostics<sup>a</sup>

| Nation | Model | Dimension | Eigenvalue | Condition Index | Variance Proportions |              |
|--------|-------|-----------|------------|-----------------|----------------------|--------------|
|        |       |           |            |                 | (Constant)           | extraversion |
| Korea  | 1     | 1         | 5.830      | 1.000           | .00                  | .00          |
|        |       | 2         | .064       | 9.551           | .00                  | .12          |
|        |       | 3         | .047       | 11.186          | .01                  | .38          |
|        |       | 4         | .028       | 14.317          | .00                  | .01          |
|        |       | 5         | .023       | 16.050          | .00                  | .48          |
|        |       | 6         | .009       | 26.051          | .99                  | .00          |
| Canada | 1     | 1         | 5.709      | 1.000           | .00                  | .00          |
|        |       | 2         | .137       | 6.465           | .00                  | .27          |
|        |       | 3         | .072       | 8.933           | .00                  | .64          |
|        |       | 4         | .041       | 11.775          | .00                  | .03          |
|        |       | 5         | .031       | 13.511          | .00                  | .03          |
|        |       | 6         | .010       | 23.848          | 1.00                 | .03          |

## Collinearity Diagnostics<sup>a</sup>

| Nation | Model | Dimension | Variance Proportions |                   |             |          |
|--------|-------|-----------|----------------------|-------------------|-------------|----------|
|        |       |           | agreeable            | conscientiousness | neuroticism | openness |
| Korea  | 1     | 1         | .00                  | .00               | .00         | .00      |
|        |       | 2         | .02                  | .02               | .57         | .00      |
|        |       | 3         | .03                  | .26               | .05         | .08      |
|        |       | 4         | .00                  | .36               | .01         | .77      |
|        |       | 5         | .82                  | .05               | .02         | .03      |
|        |       | 6         | .13                  | .31               | .35         | .12      |
| Canada | 1     | 1         | .00                  | .00               | .00         | .00      |
|        |       | 2         | .00                  | .01               | .33         | .00      |
|        |       | 3         | .02                  | .18               | .17         | .02      |
|        |       | 4         | .02                  | .37               | .06         | .59      |
|        |       | 5         | .86                  | .12               | .00         | .23      |
|        |       | 6         | .09                  | .32               | .43         | .15      |

a. Dependent Variable: inflexibility

```

REGRESSION
  /MISSING LISTWISE
  /STATISTICS COEFF OUTS CI(95) R ANOVA COLLIN TOL CHANGE ZPP
  /CRITERIA=PIN(.05) POUT(.10)
  /NOORIGIN
  /DEPENDENT social_well_being
  /METHOD=ENTER age sex extraversion agreeable conscientiousnessneuroticis
m openness
  /METHOD=ENTER eudaimonism inclusive externality fear transformative fragi
lity valuing
  inflexibility.

```

## Regression



## Notes

|                        |                                                                                                                                                                                                                                                                                                                                                                                                              |                                                                             |
|------------------------|--------------------------------------------------------------------------------------------------------------------------------------------------------------------------------------------------------------------------------------------------------------------------------------------------------------------------------------------------------------------------------------------------------------|-----------------------------------------------------------------------------|
| Output Created         |                                                                                                                                                                                                                                                                                                                                                                                                              | 20-MAY-2019 12:22:47                                                        |
| Comments               |                                                                                                                                                                                                                                                                                                                                                                                                              |                                                                             |
| Input                  | Data                                                                                                                                                                                                                                                                                                                                                                                                         | C:\Users\1\Desktop\korea cnada study\merge korea canada\final.sav           |
|                        | Active Dataset                                                                                                                                                                                                                                                                                                                                                                                               | DataSet1                                                                    |
|                        | Filter                                                                                                                                                                                                                                                                                                                                                                                                       | <none>                                                                      |
|                        | Weight                                                                                                                                                                                                                                                                                                                                                                                                       | <none>                                                                      |
|                        | Split File                                                                                                                                                                                                                                                                                                                                                                                                   | Nation                                                                      |
|                        | N of Rows in Working Data File                                                                                                                                                                                                                                                                                                                                                                               | 1837                                                                        |
| Missing Value Handling | Definition of Missing                                                                                                                                                                                                                                                                                                                                                                                        | User-defined missing values are treated as missing.                         |
|                        | Cases Used                                                                                                                                                                                                                                                                                                                                                                                                   | Statistics are based on cases with no missing values for any variable used. |
| Syntax                 | <pre> REGRESSION   /MISSING LISTWISE   /STATISTICS COEFF   OUTS CI(95) R ANOVA   COLLIN TOL CHANGE   ZPP   /CRITERIA=PIN(.05)   POUT(.10)   /NOORIGIN   /DEPENDENT   social_well_being   /METHOD=ENTER age   sex extraversion   agreeable   conscientiousness   neuroticism openness   /METHOD=ENTER   eudaimonism inclusive   externality fear   transformative fragility   valuing   inflexibility. </pre> |                                                                             |
| Resources              | Processor Time                                                                                                                                                                                                                                                                                                                                                                                               | 00:00:00.03                                                                 |
|                        | Elapsed Time                                                                                                                                                                                                                                                                                                                                                                                                 | 00:00:00.03                                                                 |
|                        | Memory Required                                                                                                                                                                                                                                                                                                                                                                                              | 21520 bytes                                                                 |
|                        | Additional Memory Required for Residual Plots                                                                                                                                                                                                                                                                                                                                                                | 0 bytes                                                                     |

### Variables Entered/Removed<sup>a</sup>

| Nation | Model | Variables Entered                                                                                                            | Variables Removed | Method |
|--------|-------|------------------------------------------------------------------------------------------------------------------------------|-------------------|--------|
| Korea  | 1     | openness,<br>age, sex,<br>extraversion,<br>neuroticism,<br>conscientious<br>ness,<br>agreeable <sup>b</sup>                  | .                 | Enter  |
|        | 2     | inflexibility,<br>transformative<br>, inclusive,<br>eudaimonism,<br>fragility,<br>valuing, fear,<br>externality <sup>b</sup> | .                 | Enter  |
| Canada | 1     | openness,<br>sex,<br>conscientious<br>ness,<br>extraversion,<br>age,<br>agreeable,<br>neuroticism <sup>b</sup>               | .                 | Enter  |
|        | 2     | transformative<br>, inclusive,<br>eudaimonism,<br>inflexibility,<br>fragility,<br>valuing, fear,<br>externality <sup>b</sup> | .                 | Enter  |

a. Dependent Variable: social\_well\_being

b. All requested variables entered.

### Model Summary

| Nation | Model | R                 | R Square | Adjusted R Square | Std. Error of the Estimate | Change ...<br>R Square Change |
|--------|-------|-------------------|----------|-------------------|----------------------------|-------------------------------|
| Korea  | 1     | .423 <sup>a</sup> | .179     | .174              | .86110                     | .179                          |
|        | 2     | .519 <sup>b</sup> | .269     | .260              | .81532                     | .090                          |
| Canada | 1     | .493 <sup>c</sup> | .243     | .235              | 1.00483                    | .243                          |
|        | 2     | .547 <sup>d</sup> | .299     | .283              | .97253                     | .057                          |

### Model Summary

|        |       | Change Statistics |     |      |               |
|--------|-------|-------------------|-----|------|---------------|
| Nation | Model | F Change          | df1 | df2  | Sig. F Change |
| Korea  | 1     | 36.431            | 7   | 1169 | .000          |
|        | 2     | 17.872            | 8   | 1161 | .000          |
| Canada | 1     | 29.859            | 7   | 652  | .000          |
|        | 2     | 6.503             | 8   | 644  | .000          |

- a. Predictors: (Constant), openness, age, sex, extraversion, neuroticism, conscientiousness, agreeable
- b. Predictors: (Constant), openness, age, sex, extraversion, neuroticism, conscientiousness, agreeable, inflexibility, transformative, inclusive, eudaimonism, fragility, valuing, fear, externality
- c. Predictors: (Constant), openness, sex, conscientiousness, extraversion, age, agreeable, neuroticism
- d. Predictors: (Constant), openness, sex, conscientiousness, extraversion, age, agreeable, neuroticism, transformative, inclusive, eudaimonism, inflexibility, fragility, valuing, fear, externality

### ANOVA<sup>a</sup>

| Nation | Model |            | Sum of Squares | df   | Mean Square | F      | Sig.              |
|--------|-------|------------|----------------|------|-------------|--------|-------------------|
| Korea  | 1     | Regression | 189.095        | 7    | 27.014      | 36.431 | .000 <sup>b</sup> |
|        |       | Residual   | 866.812        | 1169 | .741        |        |                   |
|        |       | Total      | 1055.907       | 1176 |             |        |                   |
|        | 2     | Regression | 284.136        | 15   | 18.942      | 28.496 | .000 <sup>c</sup> |
|        |       | Residual   | 771.772        | 1161 | .665        |        |                   |
|        |       | Total      | 1055.907       | 1176 |             |        |                   |
| Canada | 1     | Regression | 211.038        | 7    | 30.148      | 29.859 | .000 <sup>d</sup> |
|        |       | Residual   | 658.313        | 652  | 1.010       |        |                   |
|        |       | Total      | 869.352        | 659  |             |        |                   |
|        | 2     | Regression | 260.245        | 15   | 17.350      | 18.344 | .000 <sup>e</sup> |
|        |       | Residual   | 609.107        | 644  | .946        |        |                   |
|        |       | Total      | 869.352        | 659  |             |        |                   |

a. Dependent Variable: social\_well\_being

b. Predictors: (Constant), openness, age, sex, extraversion, neuroticism, conscientiousness, agreeable

c. Predictors: (Constant), openness, age, sex, extraversion, neuroticism, conscientiousness, agreeable, inflexibility, transformative, inclusive, eudaimonism, fragility, valuing, fear, externality

d. Predictors: (Constant), openness, sex, conscientiousness, extraversion, age, agreeable, neuroticism

e. Predictors: (Constant), openness, sex, conscientiousness, extraversion, age, agreeable, neuroticism, transformative, inclusive, eudaimonism, inflexibility, fragility, valuing, fear, externality

### Coefficients<sup>a</sup>

| Nation         | Model |                   | Unstandardized Coefficients |            | Standardized Coefficients | t      |
|----------------|-------|-------------------|-----------------------------|------------|---------------------------|--------|
|                |       |                   | B                           | Std. Error | Beta                      |        |
| Korea          | 1     | (Constant)        | .361                        | .266       |                           | 1.355  |
|                |       | age               | .005                        | .002       | .062                      | 2.242  |
|                |       | sex               | -.107                       | .052       | -.056                     | -2.066 |
|                |       | extraversion      | .316                        | .041       | .239                      | 7.738  |
|                |       | agreeable         | .180                        | .046       | .120                      | 3.883  |
|                |       | conscientiousness | .052                        | .039       | .038                      | 1.353  |
|                |       | neuroticism       | -.272                       | .039       | -.195                     | -7.007 |
|                |       | openness          | .100                        | .040       | .070                      | 2.504  |
|                | 2     | (Constant)        | .360                        | .314       |                           | 1.146  |
|                |       | age               | .001                        | .002       | .011                      | .415   |
|                |       | sex               | -.131                       | .050       | -.069                     | -2.619 |
|                |       | extraversion      | .284                        | .039       | .214                      | 7.285  |
|                |       | agreeable         | .121                        | .045       | .081                      | 2.697  |
|                |       | conscientiousness | .041                        | .037       | .030                      | 1.106  |
|                |       | neuroticism       | -.216                       | .039       | -.156                     | -5.506 |
|                |       | openness          | .088                        | .038       | .061                      | 2.315  |
|                |       | eudaimonism       | .008                        | .005       | .042                      | 1.601  |
|                |       | inclusive         | .178                        | .022       | .212                      | 8.055  |
|                |       | externality       | -.062                       | .028       | -.069                     | -2.235 |
|                |       | fear              | -.053                       | .027       | -.061                     | -1.961 |
| transformative | .082  | .024              | .098                        | 3.376      |                           |        |
| fragility      | -.112 | .024              | -.125                       | -4.597     |                           |        |
| valuing        | .083  | .037              | .063                        | 2.235      |                           |        |
| inflexibility  | -.015 | .024              | -.017                       | -.627      |                           |        |
| Canada         | 1     | (Constant)        | .804                        | .398       |                           | 2.017  |
|                |       | age               | .003                        | .003       | .041                      | 1.124  |
|                |       | sex               | -.087                       | .087       | -.037                     | -1.003 |
|                |       | extraversion      | .197                        | .043       | .168                      | 4.589  |
|                |       | agreeable         | .242                        | .055       | .172                      | 4.425  |
|                |       | conscientiousness | -.013                       | .050       | -.009                     | -.253  |
|                |       | neuroticism       | -.370                       | .049       | -.297                     | -7.606 |
|                |       | openness          | .139                        | .053       | .094                      | 2.641  |
|                | 2     | (Constant)        | .437                        | .471       |                           | .927   |
|                |       | age               | .004                        | .003       | .054                      | 1.498  |
|                |       | sex               | -.140                       | .085       | -.059                     | -1.653 |
|                |       | extraversion      | .139                        | .043       | .118                      | 3.210  |
|                |       | agreeable         | .198                        | .056       | .140                      | 3.560  |

### Coefficients<sup>a</sup>

| Nation         | Model |                   | Sig.  | 95.0% Confidence Interval for B |             | Correlations<br>Zero-order |
|----------------|-------|-------------------|-------|---------------------------------|-------------|----------------------------|
|                |       |                   |       | Lower Bound                     | Upper Bound |                            |
| Korea          | 1     | (Constant)        | .176  | -.162                           | .883        |                            |
|                |       | age               | .025  | .001                            | .009        | .087                       |
|                |       | sex               | .039  | -.209                           | -.005       | -.077                      |
|                |       | extraversion      | .000  | .236                            | .396        | .315                       |
|                |       | agreeable         | .000  | .089                            | .271        | .253                       |
|                |       | conscientiousness | .176  | -.023                           | .128        | .154                       |
|                |       | neuroticism       | .000  | -.348                           | -.196       | -.238                      |
|                |       | openness          | .012  | .022                            | .178        | .163                       |
|                | 2     | (Constant)        | .252  | -.257                           | .977        |                            |
|                |       | age               | .678  | -.003                           | .005        | .087                       |
|                |       | sex               | .009  | -.229                           | -.033       | -.077                      |
|                |       | extraversion      | .000  | .207                            | .360        | .315                       |
|                |       | agreeable         | .007  | .033                            | .208        | .253                       |
|                |       | conscientiousness | .269  | -.031                           | .113        | .154                       |
|                |       | neuroticism       | .000  | -.293                           | -.139       | -.238                      |
|                |       | openness          | .021  | .013                            | .163        | .163                       |
|                |       | eudaimonism       | .110  | -.002                           | .017        | .121                       |
|                |       | inclusive         | .000  | .135                            | .221        | .296                       |
|                |       | externality       | .026  | -.116                           | -.008       | -.211                      |
|                |       | fear              | .050  | -.107                           | .000        | -.135                      |
| transformative | .001  | .034              | .129  | .103                            |             |                            |
| fragility      | .000  | -.160             | -.064 | -.170                           |             |                            |
| valuing        | .026  | .010              | .156  | -.002                           |             |                            |
| inflexibility  | .531  | -.062             | .032  | -.083                           |             |                            |
| Canada         | 1     | (Constant)        | .044  | .021                            | 1.586       |                            |
|                |       | age               | .261  | -.002                           | .008        | .173                       |
|                |       | sex               | .316  | -.257                           | .083        | -.037                      |
|                |       | extraversion      | .000  | .113                            | .282        | .310                       |
|                |       | agreeable         | .000  | .135                            | .350        | .290                       |
|                |       | conscientiousness | .800  | -.111                           | .086        | .174                       |
|                |       | neuroticism       | .000  | -.466                           | -.275       | -.394                      |
|                |       | openness          | .008  | .036                            | .242        | .184                       |
|                | 2     | (Constant)        | .354  | -.489                           | 1.362       |                            |
|                |       | age               | .135  | -.001                           | .009        | .173                       |
|                |       | sex               | .099  | -.307                           | .026        | -.037                      |
|                |       | extraversion      | .001  | .054                            | .224        | .310                       |
|                |       | agreeable         | .000  | .089                            | .307        | .290                       |
|                |       |                   |       |                                 |             |                            |

### Coefficients<sup>a</sup>

| Nation         | Model |                   | Correlations |       | Collinearity Statistics |       |
|----------------|-------|-------------------|--------------|-------|-------------------------|-------|
|                |       |                   | Partial      | Part  | Tolerance               | VIF   |
| Korea          | 1     | (Constant)        |              |       |                         |       |
|                |       | age               | .065         | .059  | .920                    | 1.086 |
|                |       | sex               | -.060        | -.055 | .941                    | 1.063 |
|                |       | extraversion      | .221         | .205  | .739                    | 1.354 |
|                |       | agreeable         | .113         | .103  | .730                    | 1.370 |
|                |       | conscientiousness | .040         | .036  | .876                    | 1.142 |
|                |       | neuroticism       | -.201        | -.186 | .903                    | 1.108 |
|                |       | openness          | .073         | .066  | .908                    | 1.101 |
|                | 2     | (Constant)        |              |       |                         |       |
|                |       | age               | .012         | .010  | .871                    | 1.148 |
|                |       | sex               | -.077        | -.066 | .908                    | 1.101 |
|                |       | extraversion      | .209         | .183  | .729                    | 1.372 |
|                |       | agreeable         | .079         | .068  | .702                    | 1.424 |
|                |       | conscientiousness | .032         | .028  | .861                    | 1.161 |
|                |       | neuroticism       | -.160        | -.138 | .789                    | 1.267 |
|                |       | openness          | .068         | .058  | .894                    | 1.118 |
|                |       | eudaimonism       | .047         | .040  | .917                    | 1.090 |
|                |       | inclusive         | .230         | .202  | .911                    | 1.097 |
|                |       | externality       | -.065        | -.056 | .655                    | 1.526 |
|                |       | fear              | -.057        | -.049 | .656                    | 1.526 |
| transformative | .099  | .085              | .742         | 1.347 |                         |       |
| fragility      | -.134 | -.115             | .845         | 1.183 |                         |       |
| valuing        | .065  | .056              | .803         | 1.246 |                         |       |
| inflexibility  | -.018 | -.016             | .853         | 1.172 |                         |       |
| Canada         | 1     | (Constant)        |              |       |                         |       |
|                |       | age               | .044         | .038  | .862                    | 1.159 |
|                |       | sex               | -.039        | -.034 | .876                    | 1.142 |
|                |       | extraversion      | .177         | .156  | .864                    | 1.157 |
|                |       | agreeable         | .171         | .151  | .772                    | 1.296 |
|                |       | conscientiousness | -.010        | -.009 | .848                    | 1.180 |
|                |       | neuroticism       | -.285        | -.259 | .764                    | 1.310 |
|                |       | openness          | .103         | .090  | .922                    | 1.085 |
|                | 2     | (Constant)        |              |       |                         |       |
|                |       | age               | .059         | .049  | .829                    | 1.206 |
|                |       | sex               | -.065        | -.055 | .852                    | 1.174 |
|                |       | extraversion      | .125         | .106  | .801                    | 1.249 |
|                |       | agreeable         | .139         | .117  | .701                    | 1.426 |
|                |       |                   |              |       |                         |       |

### Coefficients<sup>a</sup>

| Nation | Model             | Unstandardized Coefficients |            | Standardized Coefficients | t      |
|--------|-------------------|-----------------------------|------------|---------------------------|--------|
|        |                   | B                           | Std. Error | Beta                      |        |
|        | conscientiousness | -.005                       | .049       | -.004                     | -.097  |
|        | neuroticism       | -.314                       | .052       | -.251                     | -6.082 |
|        | openness          | .095                        | .052       | .064                      | 1.815  |
|        | eudaimonism       | .021                        | .007       | .098                      | 2.838  |
|        | inclusive         | .092                        | .031       | .105                      | 2.950  |
|        | externality       | -.029                       | .039       | -.033                     | -.728  |
|        | fear              | -.112                       | .037       | -.136                     | -2.994 |
|        | transformative    | .038                        | .033       | .042                      | 1.156  |
|        | fragility         | -.090                       | .034       | -.102                     | -2.671 |
|        | valuing           | .116                        | .047       | .099                      | 2.479  |
|        | inflexibility     | .074                        | .036       | .081                      | 2.078  |

### Coefficients<sup>a</sup>

| Nation | Model             | Sig. | 95.0% Confidence Interval for B |             | Correlations |
|--------|-------------------|------|---------------------------------|-------------|--------------|
|        |                   |      | Lower Bound                     | Upper Bound | Zero-order   |
|        | conscientiousness | .923 | -.101                           | .092        | .174         |
|        | neuroticism       | .000 | -.415                           | -.212       | -.394        |
|        | openness          | .070 | -.008                           | .197        | .184         |
|        | eudaimonism       | .005 | .006                            | .035        | .176         |
|        | inclusive         | .003 | .031                            | .153        | .202         |
|        | externality       | .467 | -.106                           | .049        | -.214        |
|        | fear              | .003 | -.185                           | -.039       | -.288        |
|        | transformative    | .248 | -.027                           | .103        | .009         |
|        | fragility         | .008 | -.156                           | -.024       | -.249        |
|        | valuing           | .013 | .024                            | .208        | -.104        |
|        | inflexibility     | .038 | .004                            | .144        | .003         |



### Coefficients<sup>a</sup>

| Nation | Model | Correlations      |       | Collinearity Statistics |      |       |
|--------|-------|-------------------|-------|-------------------------|------|-------|
|        |       | Partial           | Part  | Tolerance               | VIF  |       |
|        |       | conscientiousness | -.004 | -.003                   | .826 | 1.211 |
|        |       | neuroticism       | -.233 | -.201                   | .637 | 1.569 |
|        |       | openness          | .071  | .060                    | .876 | 1.142 |
|        |       | eudaimonism       | .111  | .094                    | .904 | 1.106 |
|        |       | inclusive         | .115  | .097                    | .856 | 1.168 |
|        |       | externality       | -.029 | -.024                   | .529 | 1.889 |
|        |       | fear              | -.117 | -.099                   | .530 | 1.888 |
|        |       | transformative    | .046  | .038                    | .807 | 1.238 |
|        |       | fragility         | -.105 | -.088                   | .746 | 1.341 |
|        |       | valuing           | .097  | .082                    | .676 | 1.480 |
|        |       | inflexibility     | .082  | .069                    | .713 | 1.402 |

a. Dependent Variable: social\_well\_being

### Excluded Variables<sup>a</sup>

| Nation | Model |                | Beta In            | t      | Sig. | Partial Correlation | Collinearity |
|--------|-------|----------------|--------------------|--------|------|---------------------|--------------|
|        |       |                |                    |        |      |                     | Tolerance    |
| Korea  | 1     | eudaimonism    | .073 <sup>b</sup>  | 2.686  | .007 | .078                | .956         |
|        |       | inclusive      | .246 <sup>b</sup>  | 9.429  | .000 | .266                | .961         |
|        |       | externality    | -.114 <sup>b</sup> | -4.141 | .000 | -.120               | .917         |
|        |       | fear           | -.060 <sup>b</sup> | -2.205 | .028 | -.064               | .937         |
|        |       | transformative | .092 <sup>b</sup>  | 3.426  | .001 | .100                | .972         |
|        |       | fragility      | -.120 <sup>b</sup> | -4.486 | .000 | -.130               | .966         |
|        |       | valuing        | .041 <sup>b</sup>  | 1.467  | .143 | .043                | .906         |
|        |       | inflexibility  | -.048 <sup>b</sup> | -1.794 | .073 | -.052               | .973         |
| Canada | 1     | eudaimonism    | .105 <sup>c</sup>  | 2.979  | .003 | .116                | .925         |
|        |       | inclusive      | .139 <sup>c</sup>  | 3.992  | .000 | .155                | .936         |
|        |       | externality    | -.043 <sup>c</sup> | -1.140 | .255 | -.045               | .832         |
|        |       | fear           | -.105 <sup>c</sup> | -2.753 | .006 | -.107               | .790         |
|        |       | transformative | .017 <sup>c</sup>  | .487   | .626 | .019                | .948         |
|        |       | fragility      | -.114 <sup>c</sup> | -3.175 | .002 | -.123               | .889         |
|        |       | valuing        | .072 <sup>c</sup>  | 1.930  | .054 | .075                | .842         |
|        |       | inflexibility  | .053 <sup>c</sup>  | 1.482  | .139 | .058                | .918         |

## Excluded Variables<sup>a</sup>

| Nation | Model |                | Collinearity Statistics |                   |
|--------|-------|----------------|-------------------------|-------------------|
|        |       |                | VIF                     | Minimum Tolerance |
| Korea  | 1     | eudaimonism    | 1.045                   | .729              |
|        |       | inclusive      | 1.040                   | .725              |
|        |       | externality    | 1.090                   | .726              |
|        |       | fear           | 1.067                   | .725              |
|        |       | transformative | 1.029                   | .723              |
|        |       | fragility      | 1.035                   | .730              |
|        |       | valuing        | 1.104                   | .730              |
|        |       | inflexibility  | 1.028                   | .721              |
| Canada | 1     | eudaimonism    | 1.081                   | .754              |
|        |       | inclusive      | 1.068                   | .764              |
|        |       | externality    | 1.202                   | .735              |
|        |       | fear           | 1.266                   | .720              |
|        |       | transformative | 1.055                   | .759              |
|        |       | fragility      | 1.125                   | .722              |
|        |       | valuing        | 1.188                   | .693              |
|        |       | inflexibility  | 1.089                   | .744              |

a. Dependent Variable: social\_well\_being

↳

b. Predictors in the Model: (Constant), openness, age, sex, extraversion, neuroticism, conscientiousness, agreeable

c. Predictors in the Model: (Constant), openness, sex, conscientiousness, extraversion, age, agreeable,

### Collinearity Diagnostics<sup>a</sup>

| Nation | Model | Dimension | Eigenvalue | Condition Index | Variance Proportions |     |     |
|--------|-------|-----------|------------|-----------------|----------------------|-----|-----|
|        |       |           |            |                 | (Constant)           | age | sex |
| Korea  | 1     | 1         | 7.661      | 1.000           | .00                  | .00 | .00 |
|        |       | 2         | .105       | 8.547           | .00                  | .22 | .46 |
|        |       | 3         | .080       | 9.769           | .00                  | .39 | .22 |
|        |       | 4         | .057       | 11.572          | .00                  | .00 | .24 |
|        |       | 5         | .040       | 13.817          | .00                  | .18 | .02 |
|        |       | 6         | .027       | 16.936          | .00                  | .08 | .01 |
|        |       | 7         | .022       | 18.558          | .00                  | .00 | .02 |
|        |       | 8         | .007       | 32.008          | .99                  | .12 | .03 |
|        | 2     | 1         | 15.013     | 1.000           | .00                  | .00 | .00 |
|        |       | 2         | .194       | 8.799           | .00                  | .01 | .01 |
|        |       | 3         | .132       | 10.681          | .00                  | .03 | .20 |
|        |       | 4         | .109       | 11.763          | .00                  | .02 | .02 |
|        |       | 5         | .095       | 12.593          | .00                  | .12 | .17 |
|        |       | 6         | .087       | 13.142          | .00                  | .05 | .23 |
|        |       | 7         | .075       | 14.174          | .00                  | .33 | .11 |
|        |       | 8         | .057       | 16.243          | .00                  | .15 | .02 |
|        | 9     | .054      | 16.706     | .00             | .06                  | .11 |     |
|        | 10    | .044      | 18.477     | .00             | .00                  | .00 |     |
|        | 11    | .041      | 19.092     | .00             | .05                  | .05 |     |
|        | 12    | .030      | 22.306     | .00             | .03                  | .00 |     |
|        | 13    | .026      | 23.802     | .00             | .09                  | .00 |     |
|        | 14    | .022      | 26.408     | .00             | .00                  | .01 |     |
|        | 15    | .017      | 29.438     | .00             | .02                  | .03 |     |
|        | 16    | .005      | 54.024     | .99             | .04                  | .04 |     |
| Canada | 1     | 1         | 7.555      | 1.000           | .00                  | .00 | .00 |
|        |       | 2         | .149       | 7.123           | .00                  | .05 | .04 |
|        |       | 3         | .095       | 8.928           | .00                  | .34 | .06 |
|        |       | 4         | .070       | 10.412          | .00                  | .01 | .51 |
|        |       | 5         | .055       | 11.677          | .00                  | .34 | .16 |
|        |       | 6         | .040       | 13.690          | .00                  | .04 | .01 |
|        |       | 7         | .028       | 16.433          | .00                  | .03 | .16 |
|        |       | 8         | .008       | 30.436          | 1.00                 | .20 | .05 |
|        | 2     | 1         | 14.609     | 1.000           | .00                  | .00 | .00 |
|        |       | 2         | .396       | 6.072           | .00                  | .00 | .00 |
|        |       | 3         | .173       | 9.178           | .00                  | .04 | .02 |
|        |       | 4         | .131       | 10.545          | .00                  | .07 | .00 |
|        |       | 5         | .107       | 11.702          | .00                  | .00 | .11 |

### Collinearity Diagnostics<sup>a</sup>

| Nation | Model | Dimension | Variance Proportions |           |                   |             |
|--------|-------|-----------|----------------------|-----------|-------------------|-------------|
|        |       |           | extraversion         | agreeable | conscientiousness | neuroticism |
| Korea  | 1     | 1         | .00                  | .00       | .00               | .00         |
|        |       | 2         | .00                  | .00       | .02               | .04         |
|        |       | 3         | .13                  | .03       | .00               | .00         |
|        |       | 4         | .09                  | .02       | .00               | .56         |
|        |       | 5         | .32                  | .01       | .20               | .08         |
|        |       | 6         | .00                  | .00       | .56               | .02         |
|        |       | 7         | .46                  | .83       | .05               | .01         |
|        |       | 8         | .00                  | .11       | .17               | .30         |
|        | 2     | 1         | .00                  | .00       | .00               | .00         |
|        |       | 2         | .01                  | .00       | .00               | .00         |
|        |       | 3         | .01                  | .01       | .00               | .02         |
|        |       | 4         | .00                  | .00       | .01               | .00         |
|        |       | 5         | .00                  | .00       | .01               | .01         |
|        |       | 6         | .06                  | .02       | .00               | .00         |
|        |       | 7         | .04                  | .00       | .00               | .00         |
|        |       | 8         | .12                  | .01       | .00               | .02         |
| Canada | 1     | 1         | .00                  | .00       | .00               | .00         |
|        |       | 2         | .16                  | .00       | .01               | .25         |
|        |       | 3         | .45                  | .00       | .02               | .00         |
|        |       | 4         | .21                  | .02       | .02               | .26         |
|        |       | 5         | .11                  | .01       | .16               | .02         |
|        |       | 6         | .03                  | .03       | .54               | .06         |
|        |       | 7         | .02                  | .92       | .02               | .02         |
|        |       | 8         | .03                  | .02       | .22               | .40         |
|        | 2     | 1         | .00                  | .00       | .00               | .00         |
|        |       | 2         | .03                  | .00       | .00               | .00         |
|        |       | 3         | .02                  | .00       | .00               | .05         |
|        |       | 4         | .01                  | .00       | .02               | .00         |
|        |       | 5         | .02                  | .00       | .00               | .10         |

### Collinearity Diagnostics<sup>a</sup>

| Nation | Model | Dimension | Variance Proportions |             |           |             |      |
|--------|-------|-----------|----------------------|-------------|-----------|-------------|------|
|        |       |           | openness             | eudaimonism | inclusive | externality | fear |
| Korea  | 1     | 1         | .00                  |             |           |             |      |
|        |       | 2         | .00                  |             |           |             |      |
|        |       | 3         | .02                  |             |           |             |      |
|        |       | 4         | .00                  |             |           |             |      |
|        |       | 5         | .22                  |             |           |             |      |
|        |       | 6         | .58                  |             |           |             |      |
|        |       | 7         | .03                  |             |           |             |      |
|        |       | 8         | .14                  |             |           |             |      |
|        | 2     | 1         | .00                  | .00         | .00       | .00         | .00  |
|        |       | 2         | .00                  | .04         | .07       | .10         | .14  |
|        |       | 3         | .00                  | .14         | .08       | .01         | .09  |
|        |       | 4         | .00                  | .21         | .68       | .00         | .01  |
|        |       | 5         | .00                  | .12         | .00       | .02         | .07  |
|        |       | 6         | .01                  | .22         | .01       | .07         | .03  |
|        |       | 7         | .01                  | .20         | .06       | .10         | .00  |
|        |       | 8         | .00                  | .01         | .00       | .03         | .23  |
| Canada | 1     | 1         | .00                  |             |           |             |      |
|        |       | 2         | .00                  |             |           |             |      |
|        |       | 3         | .00                  |             |           |             |      |
|        |       | 4         | .00                  |             |           |             |      |
|        |       | 5         | .23                  |             |           |             |      |
|        |       | 6         | .40                  |             |           |             |      |
|        |       | 7         | .18                  |             |           |             |      |
|        |       | 8         | .17                  |             |           |             |      |
|        | 2     | 1         | .00                  | .00         | .00       | .00         | .00  |
|        |       | 2         | .00                  | .01         | .01       | .04         | .12  |
|        |       | 3         | .00                  | .01         | .01       | .01         | .01  |
|        |       | 4         | .00                  | .01         | .65       | .00         | .00  |
|        |       | 5         | .00                  | .15         | .00       | .04         | .24  |

### Collinearity Diagnostics<sup>a</sup>

| Nation | Model | Dimension | Variance Proportions |           |         |               |
|--------|-------|-----------|----------------------|-----------|---------|---------------|
|        |       |           | transformative       | fragility | valuing | inflexibility |
| Korea  | 1     | 1         |                      |           |         |               |
|        |       | 2         |                      |           |         |               |
|        |       | 3         |                      |           |         |               |
|        |       | 4         |                      |           |         |               |
|        |       | 5         |                      |           |         |               |
|        |       | 6         |                      |           |         |               |
|        |       | 7         |                      |           |         |               |
|        |       | 8         |                      |           |         |               |
|        | 2     | 1         | .00                  | .00       | .00     | .00           |
|        |       | 2         | .00                  | .00       | .00     | .01           |
|        |       | 3         | .03                  | .00       | .00     | .00           |
|        |       | 4         | .00                  | .00       | .00     | .00           |
|        |       | 5         | .05                  | .00       | .00     | .16           |
|        |       | 6         | .06                  | .01       | .00     | .03           |
|        |       | 7         | .10                  | .01       | .00     | .00           |
|        |       | 8         | .12                  | .08       | .00     | .22           |
|        | 9     | .02       | .04                  | .01       | .39     |               |
|        | 10    | .25       | .01                  | .00       | .05     |               |
|        | 11    | .12       | .10                  | .00       | .03     |               |
|        | 12    | .19       | .63                  | .00       | .01     |               |
|        | 13    | .03       | .00                  | .02       | .00     |               |
|        | 14    | .02       | .02                  | .01       | .00     |               |
|        | 15    | .00       | .03                  | .84       | .02     |               |
|        | 16    | .00       | .05                  | .11       | .07     |               |
| Canada | 1     | 1         |                      |           |         |               |
|        |       | 2         |                      |           |         |               |
|        |       | 3         |                      |           |         |               |
|        |       | 4         |                      |           |         |               |
|        |       | 5         |                      |           |         |               |
|        |       | 6         |                      |           |         |               |
|        |       | 7         |                      |           |         |               |
|        |       | 8         |                      |           |         |               |
|        | 2     | 1         | .00                  | .00       | .00     | .00           |
|        |       | 2         | .00                  | .00       | .00     | .02           |
|        |       | 3         | .03                  | .01       | .00     | .31           |
|        |       | 4         | .00                  | .01       | .00     | .00           |
|        |       | 5         | .10                  | .00       | .01     | .01           |

### Collinearity Diagnostics<sup>a</sup>

| Nation | Model | Dimension | Eigenvalue | Condition Index | Variance Proportions |     |     |
|--------|-------|-----------|------------|-----------------|----------------------|-----|-----|
|        |       |           |            |                 | (Constant)           | age | sex |
|        |       | 6         | .097       | 12.289          | .00                  | .00 | .00 |
|        |       | 7         | .086       | 13.039          | .00                  | .21 | .09 |
|        |       | 8         | .073       | 14.174          | .00                  | .01 | .07 |
|        |       | 9         | .070       | 14.491          | .00                  | .10 | .10 |
|        |       | 10        | .061       | 15.481          | .00                  | .00 | .33 |
|        |       | 11        | .051       | 16.871          | .00                  | .35 | .02 |
|        |       | 12        | .044       | 18.168          | .00                  | .00 | .03 |
|        |       | 13        | .038       | 19.549          | .00                  | .00 | .01 |
|        |       | 14        | .031       | 21.685          | .00                  | .01 | .03 |
|        |       | 15        | .026       | 23.599          | .00                  | .05 | .12 |
|        |       | 16        | .006       | 50.079          | 1.00                 | .15 | .06 |

### Collinearity Diagnostics<sup>a</sup>

| Nation | Model | Dimension | Variance Proportions |           |                   |             |
|--------|-------|-----------|----------------------|-----------|-------------------|-------------|
|        |       |           | extraversion         | agreeable | conscientiousness | neuroticism |
|        |       | 6         | .38                  | .00       | .00               | .00         |
|        |       | 7         | .13                  | .00       | .01               | .01         |
|        |       | 8         | .17                  | .00       | .00               | .06         |
|        |       | 9         | .06                  | .00       | .00               | .01         |
|        |       | 10        | .01                  | .01       | .00               | .19         |
|        |       | 11        | .04                  | .00       | .35               | .05         |
|        |       | 12        | .05                  | .01       | .00               | .08         |
|        |       | 13        | .00                  | .01       | .28               | .03         |
|        |       | 14        | .03                  | .00       | .10               | .27         |
|        |       | 15        | .03                  | .94       | .04               | .00         |
|        |       | 16        | .03                  | .02       | .20               | .14         |

### Collinearity Diagnostics<sup>a</sup>

| Nation | Model | Dimension | Variance Proportions |             |           |             |      |
|--------|-------|-----------|----------------------|-------------|-----------|-------------|------|
|        |       |           | openness             | eudaimonism | inclusive | externality | fear |
|        |       | 6         | .00                  | .40         | .01       | .01         | .08  |
|        |       | 7         | .00                  | .02         | .20       | .06         | .00  |
|        |       | 8         | .01                  | .17         | .00       | .06         | .02  |
|        |       | 9         | .00                  | .00         | .03       | .33         | .44  |
|        |       | 10        | .01                  | .00         | .00       | .36         | .05  |
|        |       | 11        | .08                  | .05         | .00       | .00         | .02  |
|        |       | 12        | .22                  | .12         | .02       | .03         | .00  |
|        |       | 13        | .39                  | .03         | .00       | .00         | .00  |
|        |       | 14        | .07                  | .00         | .07       | .05         | .00  |
|        |       | 15        | .10                  | .01         | .00       | .01         | .02  |
|        |       | 16        | .12                  | .03         | .00       | .00         | .00  |

### Collinearity Diagnostics<sup>a</sup>

| Nation | Model | Dimension | Variance Proportions |           |         |               |
|--------|-------|-----------|----------------------|-----------|---------|---------------|
|        |       |           | transformative       | fragility | valuing | inflexibility |
|        |       | 6         | .00                  | .00       | .00     | .06           |
|        |       | 7         | .00                  | .02       | .00     | .28           |
|        |       | 8         | .38                  | .03       | .00     | .08           |
|        |       | 9         | .16                  | .03       | .01     | .00           |
|        |       | 10        | .00                  | .06       | .02     | .14           |
|        |       | 11        | .08                  | .03       | .00     | .00           |
|        |       | 12        | .13                  | .55       | .00     | .00           |
|        |       | 13        | .05                  | .21       | .12     | .00           |
|        |       | 14        | .01                  | .02       | .75     | .00           |
|        |       | 15        | .03                  | .00       | .01     | .03           |
|        |       | 16        | .02                  | .02       | .06     | .06           |

a. Dependent Variable: social\_well\_being

REGRESSION

/MISSING LISTWISE

/STATISTICS COEFF OUTS CI(95) R ANOVA COLLIN TOL CHANGE ZPP

/CRITERIA=PIN(.05) POUT(.10)

/NOORIGIN

/DEPENDENT psychological\_well\_being

/METHOD=ENTER age sex extraversion agreeable conscientiousness neuroticis



m openness

/METHOD=ENTER eudaimonism inclusive externality fear transformative fragility valuing  
inflexibility.

## Regression

### Notes

|                        |                                |                                                                                                                                                                                                                                                                                                                                                                                                                             |
|------------------------|--------------------------------|-----------------------------------------------------------------------------------------------------------------------------------------------------------------------------------------------------------------------------------------------------------------------------------------------------------------------------------------------------------------------------------------------------------------------------|
| Output Created         |                                | 20-MAY-2019 12:22:55                                                                                                                                                                                                                                                                                                                                                                                                        |
| Comments               |                                |                                                                                                                                                                                                                                                                                                                                                                                                                             |
| Input                  | Data                           | C:\Users\1\Desktop\korea cnada study\merge korea canada\final.sav                                                                                                                                                                                                                                                                                                                                                           |
|                        | Active Dataset                 | DataSet1                                                                                                                                                                                                                                                                                                                                                                                                                    |
|                        | Filter                         | <none>                                                                                                                                                                                                                                                                                                                                                                                                                      |
|                        | Weight                         | <none>                                                                                                                                                                                                                                                                                                                                                                                                                      |
|                        | Split File                     | Nation                                                                                                                                                                                                                                                                                                                                                                                                                      |
|                        | N of Rows in Working Data File | 1837                                                                                                                                                                                                                                                                                                                                                                                                                        |
| Missing Value Handling | Definition of Missing          | User-defined missing values are treated as missing.                                                                                                                                                                                                                                                                                                                                                                         |
|                        | Cases Used                     | Statistics are based on cases with no missing values for any variable used.                                                                                                                                                                                                                                                                                                                                                 |
| Syntax                 |                                | REGRESSION<br>/MISSING LISTWISE<br>/STATISTICS COEFF<br>OUTS CI(95) R ANOVA<br>COLLIN TOL CHANGE<br>ZPP<br>/CRITERIA=PIN(.05)<br>POUT(.10)<br>/NOORIGIN<br>/DEPENDENT<br>psychological_well_being<br>/METHOD=ENTER age<br>sex extraversion<br>agreeable<br>conscientiousness<br>neuroticism openness<br>/METHOD=ENTER<br>eudaimonism inclusive<br>externality fear<br>transformative fragility<br>valuing<br>inflexibility. |
| Resources              | Processor Time                 | 00:00:00.08                                                                                                                                                                                                                                                                                                                                                                                                                 |
|                        | Elapsed Time                   | 00:00:00.05                                                                                                                                                                                                                                                                                                                                                                                                                 |

### Notes

|                                               |             |
|-----------------------------------------------|-------------|
| Memory Required                               | 21520 bytes |
| Additional Memory Required for Residual Plots | 0 bytes     |

### Variables Entered/Removed<sup>a</sup>

| Nation | Model | Variables Entered                                                                                         | Variables Removed | Method |
|--------|-------|-----------------------------------------------------------------------------------------------------------|-------------------|--------|
| Korea  | 1     | openness, age, sex, extraversion, neuroticism, conscientiousness, agreeable <sup>b</sup>                  | .                 | Enter  |
|        | 2     | inflexibility, transformative, inclusive, eudaimonism, fragility, valuing, fear, externality <sup>b</sup> | .                 | Enter  |
| Canada | 1     | openness, sex, conscientiousness, extraversion, age, agreeable, neuroticism <sup>b</sup>                  | .                 | Enter  |
|        | 2     | transformative, inclusive, eudaimonism, inflexibility, fragility, valuing, fear, externality <sup>b</sup> | .                 | Enter  |

a. Dependent Variable: psychological\_well\_being

b. All requested variables entered.

### Model Summary

| Nation | Model | R                 | R Square | Adjusted R Square | Std. Error of the Estimate | Change ...<br>R Square Change |
|--------|-------|-------------------|----------|-------------------|----------------------------|-------------------------------|
| Korea  | 1     | .535 <sup>a</sup> | .286     | .282              | .87991                     | .286                          |
|        | 2     | .609 <sup>b</sup> | .371     | .363              | .82853                     | .085                          |
| Canada | 1     | .600 <sup>c</sup> | .360     | .354              | 1.01684                    | .360                          |
|        | 2     | .629 <sup>d</sup> | .396     | .382              | .99446                     | .035                          |

### Model Summary

|        |       | Change Statistics |     |      |               |
|--------|-------|-------------------|-----|------|---------------|
| Nation | Model | F Change          | df1 | df2  | Sig. F Change |
| Korea  | 1     | 66.880            | 7   | 1169 | .000          |
|        | 2     | 19.686            | 8   | 1161 | .000          |
| Canada | 1     | 52.506            | 7   | 652  | .000          |
|        | 2     | 4.709             | 8   | 644  | .000          |

- a. Predictors: (Constant), openness, age, sex, extraversion, neuroticism, conscientiousness, agreeable
- b. Predictors: (Constant), openness, age, sex, extraversion, neuroticism, conscientiousness, agreeable, inflexibility, transformative, inclusive, eudaimonism, fragility, valuing, fear, externality
- c. Predictors: (Constant), openness, sex, conscientiousness, extraversion, age, agreeable, neuroticism
- d. Predictors: (Constant), openness, sex, conscientiousness, extraversion, age, agreeable, neuroticism, transformative, inclusive, eudaimonism, inflexibility, fragility, valuing, fear, externality

### ANOVA<sup>a</sup>

| Nation | Model |            | Sum of Squares | df   | Mean Square | F      | Sig.              |
|--------|-------|------------|----------------|------|-------------|--------|-------------------|
| Korea  | 1     | Regression | 362.469        | 7    | 51.781      | 66.880 | .000 <sup>b</sup> |
|        |       | Residual   | 905.089        | 1169 | .774        |        |                   |
|        |       | Total      | 1267.558       | 1176 |             |        |                   |
|        | 2     | Regression | 470.576        | 15   | 31.372      | 45.701 | .000 <sup>c</sup> |
|        |       | Residual   | 796.982        | 1161 | .686        |        |                   |
|        |       | Total      | 1267.558       | 1176 |             |        |                   |
| Canada | 1     | Regression | 380.026        | 7    | 54.289      | 52.506 | .000 <sup>d</sup> |
|        |       | Residual   | 674.143        | 652  | 1.034       |        |                   |
|        |       | Total      | 1054.169       | 659  |             |        |                   |
|        | 2     | Regression | 417.285        | 15   | 27.819      | 28.130 | .000 <sup>e</sup> |
|        |       | Residual   | 636.884        | 644  | .989        |        |                   |
|        |       | Total      | 1054.169       | 659  |             |        |                   |

a. Dependent Variable: psychological\_well\_being

b. Predictors: (Constant), openness, age, sex, extraversion, neuroticism, conscientiousness, agreeable

c. Predictors: (Constant), openness, age, sex, extraversion, neuroticism, conscientiousness, agreeable, inflexibility, transformative, inclusive, eudaimonism, fragility, valuing, fear, externality

d. Predictors: (Constant), openness, sex, conscientiousness, extraversion, age, agreeable, neuroticism

e. Predictors: (Constant), openness, sex, conscientiousness, extraversion, age, agreeable, neuroticism, transformative, inclusive, eudaimonism, inflexibility, fragility, valuing, fear, externality

### Coefficients<sup>a</sup>

| Nation         | Model |                   | Unstandardized Coefficients |            | Standardized Coefficients | t      |
|----------------|-------|-------------------|-----------------------------|------------|---------------------------|--------|
|                |       |                   | B                           | Std. Error | Beta                      |        |
| Korea          | 1     | (Constant)        | -.238                       | .272       |                           | -.875  |
|                |       | age               | .003                        | .002       | .029                      | 1.132  |
|                |       | sex               | .079                        | .053       | .038                      | 1.489  |
|                |       | extraversion      | .378                        | .042       | .260                      | 9.050  |
|                |       | agreeable         | .155                        | .047       | .095                      | 3.270  |
|                |       | conscientiousness | .221                        | .039       | .148                      | 5.610  |
|                |       | neuroticism       | -.381                       | .040       | -.250                     | -9.621 |
|                |       | openness          | .260                        | .041       | .165                      | 6.382  |
|                | 2     | (Constant)        | -.238                       | .320       |                           | -.744  |
|                |       | age               | -.002                       | .002       | -.021                     | -.828  |
|                |       | sex               | .070                        | .051       | .034                      | 1.372  |
|                |       | extraversion      | .339                        | .040       | .233                      | 8.565  |
|                |       | agreeable         | .086                        | .045       | .052                      | 1.890  |
|                |       | conscientiousness | .196                        | .037       | .132                      | 5.247  |
|                |       | neuroticism       | -.337                       | .040       | -.221                     | -8.439 |
|                |       | openness          | .251                        | .039       | .160                      | 6.485  |
|                |       | eudaimonism       | .007                        | .005       | .035                      | 1.447  |
|                |       | inclusive         | .121                        | .022       | .132                      | 5.402  |
|                |       | externality       | -.092                       | .028       | -.094                     | -3.271 |
|                |       | fear              | -.113                       | .028       | -.117                     | -4.075 |
| transformative | .125  | .025              | .137                        | 5.067      |                           |        |
| fragility      | -.132 | .025              | -.135                       | -5.335     |                           |        |
| valuing        | .173  | .038              | .119                        | 4.574      |                           |        |
| inflexibility  | -.001 | .024              | -.001                       | -.036      |                           |        |
| Canada         | 1     | (Constant)        | 1.056                       | .403       |                           | 2.618  |
|                |       | age               | .002                        | .003       | .023                      | .682   |
|                |       | sex               | -.026                       | .088       | -.010                     | -.291  |
|                |       | extraversion      | .283                        | .043       | .219                      | 6.514  |
|                |       | agreeable         | .306                        | .055       | .197                      | 5.519  |
|                |       | conscientiousness | .144                        | .051       | .097                      | 2.848  |
|                |       | neuroticism       | -.459                       | .049       | -.334                     | -9.307 |
|                |       | openness          | .113                        | .053       | .069                      | 2.120  |
|                | 2     | (Constant)        | 1.228                       | .482       |                           | 2.548  |
|                |       | age               | .003                        | .003       | .038                      | 1.129  |
|                |       | sex               | -.100                       | .087       | -.038                     | -1.149 |
|                |       | extraversion      | .224                        | .044       | .173                      | 5.069  |
|                |       | agreeable         | .237                        | .057       | .152                      | 4.170  |
|                |       |                   |                             |            |                           |        |

### Coefficients<sup>a</sup>

| Nation         | Model |                   | Sig.  | 95.0% Confidence Interval for B |             | Correlations<br>Zero-order |
|----------------|-------|-------------------|-------|---------------------------------|-------------|----------------------------|
|                |       |                   |       | Lower Bound                     | Upper Bound |                            |
| Korea          | 1     | (Constant)        | .382  | -.772                           | .296        |                            |
|                |       | age               | .258  | -.002                           | .007        | .077                       |
|                |       | sex               | .137  | -.025                           | .183        | -.006                      |
|                |       | extraversion      | .000  | .296                            | .459        | .366                       |
|                |       | agreeable         | .001  | .062                            | .248        | .286                       |
|                |       | conscientiousness | .000  | .144                            | .298        | .280                       |
|                |       | neuroticism       | .000  | -.459                           | -.303       | -.296                      |
|                |       | openness          | .000  | .180                            | .340        | .278                       |
|                | 2     | (Constant)        | .457  | -.865                           | .389        |                            |
|                |       | age               | .408  | -.006                           | .002        | .077                       |
|                |       | sex               | .170  | -.030                           | .169        | -.006                      |
|                |       | extraversion      | .000  | .261                            | .416        | .366                       |
|                |       | agreeable         | .059  | -.003                           | .175        | .286                       |
|                |       | conscientiousness | .000  | .123                            | .270        | .280                       |
|                |       | neuroticism       | .000  | -.415                           | -.258       | -.296                      |
|                |       | openness          | .000  | .175                            | .327        | .278                       |
|                |       | eudaimonism       | .148  | -.002                           | .016        | .125                       |
|                |       | inclusive         | .000  | .077                            | .165        | .244                       |
|                |       | externality       | .001  | -.147                           | -.037       | -.265                      |
|                |       | fear              | .000  | -.167                           | -.059       | -.211                      |
| transformative | .000  | .076              | .173  | .110                            |             |                            |
| fragility      | .000  | -.181             | -.084 | -.174                           |             |                            |
| valuing        | .000  | .099              | .247  | .009                            |             |                            |
| inflexibility  | .971  | -.049             | .047  | -.088                           |             |                            |
| Canada         | 1     | (Constant)        | .009  | .264                            | 1.848       |                            |
|                |       | age               | .496  | -.003                           | .007        | .190                       |
|                |       | sex               | .771  | -.197                           | .146        | -.007                      |
|                |       | extraversion      | .000  | .198                            | .369        | .390                       |
|                |       | agreeable         | .000  | .197                            | .415        | .358                       |
|                |       | conscientiousness | .005  | .045                            | .244        | .301                       |
|                |       | neuroticism       | .000  | -.555                           | -.362       | -.473                      |
|                |       | openness          | .034  | .008                            | .217        | .186                       |
|                | 2     | (Constant)        | .011  | .282                            | 2.174       |                            |
|                |       | age               | .259  | -.002                           | .008        | .190                       |
|                |       | sex               | .251  | -.270                           | .071        | -.007                      |
|                |       | extraversion      | .000  | .137                            | .311        | .390                       |
|                |       | agreeable         | .000  | .125                            | .349        | .358                       |

### Coefficients<sup>a</sup>

| Nation         | Model |                   | Correlations |       | Collinearity Statistics |       |
|----------------|-------|-------------------|--------------|-------|-------------------------|-------|
|                |       |                   | Partial      | Part  | Tolerance               | VIF   |
| Korea          | 1     | (Constant)        |              |       |                         |       |
|                |       | age               | .033         | .028  | .920                    | 1.086 |
|                |       | sex               | .043         | .037  | .941                    | 1.063 |
|                |       | extraversion      | .256         | .224  | .739                    | 1.354 |
|                |       | agreeable         | .095         | .081  | .730                    | 1.370 |
|                |       | conscientiousness | .162         | .139  | .876                    | 1.142 |
|                |       | neuroticism       | -.271        | -.238 | .903                    | 1.108 |
|                |       | openness          | .183         | .158  | .908                    | 1.101 |
|                | 2     | (Constant)        |              |       |                         |       |
|                |       | age               | -.024        | -.019 | .871                    | 1.148 |
|                |       | sex               | .040         | .032  | .908                    | 1.101 |
|                |       | extraversion      | .244         | .199  | .729                    | 1.372 |
|                |       | agreeable         | .055         | .044  | .702                    | 1.424 |
|                |       | conscientiousness | .152         | .122  | .861                    | 1.161 |
|                |       | neuroticism       | -.240        | -.196 | .789                    | 1.267 |
|                |       | openness          | .187         | .151  | .894                    | 1.118 |
|                |       | eudaimonism       | .042         | .034  | .917                    | 1.090 |
|                |       | inclusive         | .157         | .126  | .911                    | 1.097 |
|                |       | externality       | -.096        | -.076 | .655                    | 1.526 |
|                |       | fear              | -.119        | -.095 | .656                    | 1.526 |
| transformative | .147  | .118              | .742         | 1.347 |                         |       |
| fragility      | -.155 | -.124             | .845         | 1.183 |                         |       |
| valuing        | .133  | .106              | .803         | 1.246 |                         |       |
| inflexibility  | -.001 | -.001             | .853         | 1.172 |                         |       |
| Canada         | 1     | (Constant)        |              |       |                         |       |
|                |       | age               | .027         | .021  | .862                    | 1.159 |
|                |       | sex               | -.011        | -.009 | .876                    | 1.142 |
|                |       | extraversion      | .247         | .204  | .864                    | 1.157 |
|                |       | agreeable         | .211         | .173  | .772                    | 1.296 |
|                |       | conscientiousness | .111         | .089  | .848                    | 1.180 |
|                |       | neuroticism       | -.342        | -.291 | .764                    | 1.310 |
|                |       | openness          | .083         | .066  | .922                    | 1.085 |
|                | 2     | (Constant)        |              |       |                         |       |
|                |       | age               | .044         | .035  | .829                    | 1.206 |
|                |       | sex               | -.045        | -.035 | .852                    | 1.174 |
|                |       | extraversion      | .196         | .155  | .801                    | 1.249 |
|                |       | agreeable         | .162         | .128  | .701                    | 1.426 |
|                |       |                   |              |       |                         |       |

### Coefficients<sup>a</sup>

| Nation | Model             | Unstandardized Coefficients |            | Standardized Coefficients | t      |
|--------|-------------------|-----------------------------|------------|---------------------------|--------|
|        |                   | B                           | Std. Error | Beta                      |        |
|        | conscientiousness | .138                        | .050       | .093                      | 2.750  |
|        | neuroticism       | -.401                       | .053       | -.292                     | -7.605 |
|        | openness          | .068                        | .053       | .042                      | 1.269  |
|        | eudaimonism       | .010                        | .007       | .041                      | 1.275  |
|        | inclusive         | .113                        | .032       | .117                      | 3.546  |
|        | externality       | -.060                       | .040       | -.063                     | -1.490 |
|        | fear              | -.110                       | .038       | -.121                     | -2.881 |
|        | transformative    | .045                        | .034       | .046                      | 1.339  |
|        | fragility         | -.030                       | .035       | -.031                     | -.880  |
|        | valuing           | .046                        | .048       | .036                      | .968   |
|        | inflexibility     | .008                        | .037       | .008                      | .228   |

### Coefficients<sup>a</sup>

| Nation | Model             | Sig. | 95.0% Confidence Interval for B |             | Correlations |
|--------|-------------------|------|---------------------------------|-------------|--------------|
|        |                   |      | Lower Bound                     | Upper Bound | Zero-order   |
|        | conscientiousness | .006 | .039                            | .236        | .301         |
|        | neuroticism       | .000 | -.505                           | -.298       | -.473        |
|        | openness          | .205 | -.037                           | .173        | .186         |
|        | eudaimonism       | .203 | -.005                           | .024        | .138         |
|        | inclusive         | .000 | .050                            | .175        | .197         |
|        | externality       | .137 | -.139                           | .019        | -.311        |
|        | fear              | .004 | -.185                           | -.035       | -.363        |
|        | transformative    | .181 | -.021                           | .112        | .007         |
|        | fragility         | .379 | -.098                           | .037        | -.237        |
|        | valuing           | .334 | -.048                           | .140        | -.192        |
|        | inflexibility     | .819 | -.063                           | .080        | -.096        |



### Coefficients<sup>a</sup>

| Nation | Model |                   | Correlations |       | Collinearity Statistics |       |
|--------|-------|-------------------|--------------|-------|-------------------------|-------|
|        |       |                   | Partial      | Part  | Tolerance               | VIF   |
|        |       | conscientiousness | .108         | .084  | .826                    | 1.211 |
|        |       | neuroticism       | -.287        | -.233 | .637                    | 1.569 |
|        |       | openness          | .050         | .039  | .876                    | 1.142 |
|        |       | eudaimonism       | .050         | .039  | .904                    | 1.106 |
|        |       | inclusive         | .138         | .109  | .856                    | 1.168 |
|        |       | externality       | -.059        | -.046 | .529                    | 1.889 |
|        |       | fear              | -.113        | -.088 | .530                    | 1.888 |
|        |       | transformative    | .053         | .041  | .807                    | 1.238 |
|        |       | fragility         | -.035        | -.027 | .746                    | 1.341 |
|        |       | valuing           | .038         | .030  | .676                    | 1.480 |
|        |       | inflexibility     | .009         | .007  | .713                    | 1.402 |

a. Dependent Variable: psychological\_well\_being

### Excluded Variables<sup>a</sup>

| Nation | Model |                | Beta In            | t      | Sig. | Partial Correlation | Collinearity |
|--------|-------|----------------|--------------------|--------|------|---------------------|--------------|
|        |       |                |                    |        |      |                     | Tolerance    |
| Korea  | 1     | eudaimonism    | .058 <sup>b</sup>  | 2.308  | .021 | .067                | .956         |
|        |       | inclusive      | .176 <sup>b</sup>  | 7.122  | .000 | .204                | .961         |
|        |       | externality    | -.140 <sup>b</sup> | -5.483 | .000 | -.158               | .917         |
|        |       | fear           | -.102 <sup>b</sup> | -4.038 | .000 | -.117               | .937         |
|        |       | transformative | .103 <sup>b</sup>  | 4.148  | .000 | .120                | .972         |
|        |       | fragility      | -.119 <sup>b</sup> | -4.787 | .000 | -.139               | .966         |
|        |       | valuing        | .078 <sup>b</sup>  | 3.032  | .002 | .088                | .906         |
|        |       | inflexibility  | -.040 <sup>b</sup> | -1.605 | .109 | -.047               | .973         |
| Canada | 1     | eudaimonism    | .053 <sup>c</sup>  | 1.640  | .102 | .064                | .925         |
|        |       | inclusive      | .122 <sup>c</sup>  | 3.798  | .000 | .147                | .936         |
|        |       | externality    | -.097 <sup>c</sup> | -2.852 | .004 | -.111               | .832         |
|        |       | fear           | -.126 <sup>c</sup> | -3.600 | .000 | -.140               | .790         |
|        |       | transformative | .024 <sup>c</sup>  | .744   | .457 | .029                | .948         |
|        |       | fragility      | -.062 <sup>c</sup> | -1.860 | .063 | -.073               | .889         |
|        |       | valuing        | .011 <sup>c</sup>  | .314   | .754 | .012                | .842         |
|        |       | inflexibility  | -.032 <sup>c</sup> | -.994  | .321 | -.039               | .918         |

### Excluded Variables<sup>a</sup>

| Nation | Model |                | Collinearity Statistics |                   |
|--------|-------|----------------|-------------------------|-------------------|
|        |       |                | VIF                     | Minimum Tolerance |
| Korea  | 1     | eudaimonism    | 1.045                   | .729              |
|        |       | inclusive      | 1.040                   | .725              |
|        |       | externality    | 1.090                   | .726              |
|        |       | fear           | 1.067                   | .725              |
|        |       | transformative | 1.029                   | .723              |
|        |       | fragility      | 1.035                   | .730              |
|        |       | valuing        | 1.104                   | .730              |
|        |       | inflexibility  | 1.028                   | .721              |
| Canada | 1     | eudaimonism    | 1.081                   | .754              |
|        |       | inclusive      | 1.068                   | .764              |
|        |       | externality    | 1.202                   | .735              |
|        |       | fear           | 1.266                   | .720              |
|        |       | transformative | 1.055                   | .759              |
|        |       | fragility      | 1.125                   | .722              |
|        |       | valuing        | 1.188                   | .693              |
|        |       | inflexibility  | 1.089                   | .744              |

a. Dependent Variable: psychological\_well\_being

↳

b. Predictors in the Model: (Constant), openness, age, sex, extraversion, neuroticism, conscientiousness, agreeable

c. Predictors in the Model: (Constant), openness, sex, conscientiousness, extraversion, age, agreeable,

### Collinearity Diagnostics<sup>a</sup>

| Nation | Model | Dimension | Eigenvalue | Condition Index | Variance Proportions |     |     |
|--------|-------|-----------|------------|-----------------|----------------------|-----|-----|
|        |       |           |            |                 | (Constant)           | age | sex |
| Korea  | 1     | 1         | 7.661      | 1.000           | .00                  | .00 | .00 |
|        |       | 2         | .105       | 8.547           | .00                  | .22 | .46 |
|        |       | 3         | .080       | 9.769           | .00                  | .39 | .22 |
|        |       | 4         | .057       | 11.572          | .00                  | .00 | .24 |
|        |       | 5         | .040       | 13.817          | .00                  | .18 | .02 |
|        |       | 6         | .027       | 16.936          | .00                  | .08 | .01 |
|        |       | 7         | .022       | 18.558          | .00                  | .00 | .02 |
|        |       | 8         | .007       | 32.008          | .99                  | .12 | .03 |
|        | 2     | 1         | 15.013     | 1.000           | .00                  | .00 | .00 |
|        |       | 2         | .194       | 8.799           | .00                  | .01 | .01 |
|        |       | 3         | .132       | 10.681          | .00                  | .03 | .20 |
|        |       | 4         | .109       | 11.763          | .00                  | .02 | .02 |
|        |       | 5         | .095       | 12.593          | .00                  | .12 | .17 |
|        |       | 6         | .087       | 13.142          | .00                  | .05 | .23 |
|        |       | 7         | .075       | 14.174          | .00                  | .33 | .11 |
|        |       | 8         | .057       | 16.243          | .00                  | .15 | .02 |
| Canada | 1     | 1         | 7.555      | 1.000           | .00                  | .00 | .00 |
|        |       | 2         | .149       | 7.123           | .00                  | .05 | .04 |
|        |       | 3         | .095       | 8.928           | .00                  | .34 | .06 |
|        |       | 4         | .070       | 10.412          | .00                  | .01 | .51 |
|        |       | 5         | .055       | 11.677          | .00                  | .34 | .16 |
|        |       | 6         | .040       | 13.690          | .00                  | .04 | .01 |
|        |       | 7         | .028       | 16.433          | .00                  | .03 | .16 |
|        |       | 8         | .008       | 30.436          | 1.00                 | .20 | .05 |
|        | 2     | 1         | 14.609     | 1.000           | .00                  | .00 | .00 |
|        |       | 2         | .396       | 6.072           | .00                  | .00 | .00 |
|        |       | 3         | .173       | 9.178           | .00                  | .04 | .02 |
|        |       | 4         | .131       | 10.545          | .00                  | .07 | .00 |
|        |       | 5         | .107       | 11.702          | .00                  | .00 | .11 |

### Collinearity Diagnostics<sup>a</sup>

| Nation | Model | Dimension | Variance Proportions |           |                   |             |
|--------|-------|-----------|----------------------|-----------|-------------------|-------------|
|        |       |           | extraversion         | agreeable | conscientiousness | neuroticism |
| Korea  | 1     | 1         | .00                  | .00       | .00               | .00         |
|        |       | 2         | .00                  | .00       | .02               | .04         |
|        |       | 3         | .13                  | .03       | .00               | .00         |
|        |       | 4         | .09                  | .02       | .00               | .56         |
|        |       | 5         | .32                  | .01       | .20               | .08         |
|        |       | 6         | .00                  | .00       | .56               | .02         |
|        |       | 7         | .46                  | .83       | .05               | .01         |
|        |       | 8         | .00                  | .11       | .17               | .30         |
|        | 2     | 1         | .00                  | .00       | .00               | .00         |
|        |       | 2         | .01                  | .00       | .00               | .00         |
|        |       | 3         | .01                  | .01       | .00               | .02         |
|        |       | 4         | .00                  | .00       | .01               | .00         |
|        |       | 5         | .00                  | .00       | .01               | .01         |
|        |       | 6         | .06                  | .02       | .00               | .00         |
|        |       | 7         | .04                  | .00       | .00               | .00         |
|        |       | 8         | .12                  | .01       | .00               | .02         |
|        |       | 9         | .05                  | .00       | .00               | .17         |
|        |       | 10        | .01                  | .01       | .01               | .24         |
|        |       | 11        | .14                  | .00       | .14               | .19         |
|        |       | 12        | .09                  | .00       | .15               | .04         |
|        |       | 13        | .01                  | .00       | .49               | .01         |
|        |       | 14        | .46                  | .81       | .03               | .00         |
|        |       | 15        | .00                  | .04       | .07               | .21         |
|        |       | 16        | .00                  | .08       | .09               | .07         |
| Canada | 1     | 1         | .00                  | .00       | .00               | .00         |
|        |       | 2         | .16                  | .00       | .01               | .25         |
|        |       | 3         | .45                  | .00       | .02               | .00         |
|        |       | 4         | .21                  | .02       | .02               | .26         |
|        |       | 5         | .11                  | .01       | .16               | .02         |
|        |       | 6         | .03                  | .03       | .54               | .06         |
|        |       | 7         | .02                  | .92       | .02               | .02         |
|        |       | 8         | .03                  | .02       | .22               | .40         |
|        | 2     | 1         | .00                  | .00       | .00               | .00         |
|        |       | 2         | .03                  | .00       | .00               | .00         |
| 3      |       | .02       | .00                  | .00       | .05               |             |
| 4      |       | .01       | .00                  | .02       | .00               |             |
| 5      |       | .02       | .00                  | .00       | .10               |             |

### Collinearity Diagnostics<sup>a</sup>

| Nation | Model | Dimension | Variance Proportions |             |           |             |      |
|--------|-------|-----------|----------------------|-------------|-----------|-------------|------|
|        |       |           | openness             | eudaimonism | inclusive | externality | fear |
| Korea  | 1     | 1         | .00                  |             |           |             |      |
|        |       | 2         | .00                  |             |           |             |      |
|        |       | 3         | .02                  |             |           |             |      |
|        |       | 4         | .00                  |             |           |             |      |
|        |       | 5         | .22                  |             |           |             |      |
|        |       | 6         | .58                  |             |           |             |      |
|        |       | 7         | .03                  |             |           |             |      |
|        |       | 8         | .14                  |             |           |             |      |
|        | 2     | 1         | .00                  | .00         | .00       | .00         | .00  |
|        |       | 2         | .00                  | .04         | .07       | .10         | .14  |
|        |       | 3         | .00                  | .14         | .08       | .01         | .09  |
|        |       | 4         | .00                  | .21         | .68       | .00         | .01  |
|        |       | 5         | .00                  | .12         | .00       | .02         | .07  |
|        |       | 6         | .01                  | .22         | .01       | .07         | .03  |
|        |       | 7         | .01                  | .20         | .06       | .10         | .00  |
|        |       | 8         | .00                  | .01         | .00       | .03         | .23  |
|        | 9     | .00       | .00                  | .02         | .10       | .11         |      |
|        | 10    | .02       | .00                  | .00         | .49       | .22         |      |
|        | 11    | .14       | .01                  | .00         | .00       | .07         |      |
|        | 12    | .11       | .01                  | .02         | .02       | .00         |      |
|        | 13    | .58       | .00                  | .00         | .03       | .01         |      |
|        | 14    | .03       | .00                  | .01         | .01       | .01         |      |
|        | 15    | .00       | .00                  | .02         | .01       | .01         |      |
|        | 16    | .08       | .03                  | .01         | .00       | .00         |      |
| Canada | 1     | 1         | .00                  |             |           |             |      |
|        |       | 2         | .00                  |             |           |             |      |
|        |       | 3         | .00                  |             |           |             |      |
|        |       | 4         | .00                  |             |           |             |      |
|        |       | 5         | .23                  |             |           |             |      |
|        |       | 6         | .40                  |             |           |             |      |
|        |       | 7         | .18                  |             |           |             |      |
|        |       | 8         | .17                  |             |           |             |      |
|        | 2     | 1         | .00                  | .00         | .00       | .00         | .00  |
|        |       | 2         | .00                  | .01         | .01       | .04         | .12  |
|        |       | 3         | .00                  | .01         | .01       | .01         | .01  |
|        |       | 4         | .00                  | .01         | .65       | .00         | .00  |
|        |       | 5         | .00                  | .15         | .00       | .04         | .24  |

### Collinearity Diagnostics<sup>a</sup>

| Nation | Model | Dimension | Variance Proportions |           |         |               |
|--------|-------|-----------|----------------------|-----------|---------|---------------|
|        |       |           | transformative       | fragility | valuing | inflexibility |
| Korea  | 1     | 1         |                      |           |         |               |
|        |       | 2         |                      |           |         |               |
|        |       | 3         |                      |           |         |               |
|        |       | 4         |                      |           |         |               |
|        |       | 5         |                      |           |         |               |
|        |       | 6         |                      |           |         |               |
|        |       | 7         |                      |           |         |               |
|        |       | 8         |                      |           |         |               |
|        | 2     | 1         | .00                  | .00       | .00     | .00           |
|        |       | 2         | .00                  | .00       | .00     | .01           |
|        |       | 3         | .03                  | .00       | .00     | .00           |
|        |       | 4         | .00                  | .00       | .00     | .00           |
|        |       | 5         | .05                  | .00       | .00     | .16           |
|        |       | 6         | .06                  | .01       | .00     | .03           |
|        |       | 7         | .10                  | .01       | .00     | .00           |
|        |       | 8         | .12                  | .08       | .00     | .22           |
| Canada | 1     | 1         |                      |           |         |               |
|        |       | 2         |                      |           |         |               |
|        |       | 3         |                      |           |         |               |
|        |       | 4         |                      |           |         |               |
|        |       | 5         |                      |           |         |               |
|        |       | 6         |                      |           |         |               |
|        |       | 7         |                      |           |         |               |
|        |       | 8         |                      |           |         |               |
|        | 2     | 1         | .00                  | .00       | .00     | .00           |
|        |       | 2         | .00                  | .00       | .00     | .02           |
|        |       | 3         | .03                  | .01       | .00     | .31           |
|        |       | 4         | .00                  | .01       | .00     | .00           |
|        |       | 5         | .10                  | .00       | .01     | .01           |

### Collinearity Diagnostics<sup>a</sup>

| Nation | Model | Dimension | Eigenvalue | Condition Index | Variance Proportions |     |     |
|--------|-------|-----------|------------|-----------------|----------------------|-----|-----|
|        |       |           |            |                 | (Constant)           | age | sex |
|        |       | 6         | .097       | 12.289          | .00                  | .00 | .00 |
|        |       | 7         | .086       | 13.039          | .00                  | .21 | .09 |
|        |       | 8         | .073       | 14.174          | .00                  | .01 | .07 |
|        |       | 9         | .070       | 14.491          | .00                  | .10 | .10 |
|        |       | 10        | .061       | 15.481          | .00                  | .00 | .33 |
|        |       | 11        | .051       | 16.871          | .00                  | .35 | .02 |
|        |       | 12        | .044       | 18.168          | .00                  | .00 | .03 |
|        |       | 13        | .038       | 19.549          | .00                  | .00 | .01 |
|        |       | 14        | .031       | 21.685          | .00                  | .01 | .03 |
|        |       | 15        | .026       | 23.599          | .00                  | .05 | .12 |
|        |       | 16        | .006       | 50.079          | 1.00                 | .15 | .06 |

### Collinearity Diagnostics<sup>a</sup>

| Nation | Model | Dimension | Variance Proportions |           |                   |             |
|--------|-------|-----------|----------------------|-----------|-------------------|-------------|
|        |       |           | extraversion         | agreeable | conscientiousness | neuroticism |
|        |       | 6         | .38                  | .00       | .00               | .00         |
|        |       | 7         | .13                  | .00       | .01               | .01         |
|        |       | 8         | .17                  | .00       | .00               | .06         |
|        |       | 9         | .06                  | .00       | .00               | .01         |
|        |       | 10        | .01                  | .01       | .00               | .19         |
|        |       | 11        | .04                  | .00       | .35               | .05         |
|        |       | 12        | .05                  | .01       | .00               | .08         |
|        |       | 13        | .00                  | .01       | .28               | .03         |
|        |       | 14        | .03                  | .00       | .10               | .27         |
|        |       | 15        | .03                  | .94       | .04               | .00         |
|        |       | 16        | .03                  | .02       | .20               | .14         |

### Collinearity Diagnostics<sup>a</sup>

| Nation | Model | Dimension | Variance Proportions |             |           |             |      |
|--------|-------|-----------|----------------------|-------------|-----------|-------------|------|
|        |       |           | openness             | eudaimonism | inclusive | externality | fear |
|        |       | 6         | .00                  | .40         | .01       | .01         | .08  |
|        |       | 7         | .00                  | .02         | .20       | .06         | .00  |
|        |       | 8         | .01                  | .17         | .00       | .06         | .02  |
|        |       | 9         | .00                  | .00         | .03       | .33         | .44  |
|        |       | 10        | .01                  | .00         | .00       | .36         | .05  |
|        |       | 11        | .08                  | .05         | .00       | .00         | .02  |
|        |       | 12        | .22                  | .12         | .02       | .03         | .00  |
|        |       | 13        | .39                  | .03         | .00       | .00         | .00  |
|        |       | 14        | .07                  | .00         | .07       | .05         | .00  |
|        |       | 15        | .10                  | .01         | .00       | .01         | .02  |
|        |       | 16        | .12                  | .03         | .00       | .00         | .00  |

### Collinearity Diagnostics<sup>a</sup>

| Nation | Model | Dimension | Variance Proportions |           |         |               |
|--------|-------|-----------|----------------------|-----------|---------|---------------|
|        |       |           | transformative       | fragility | valuing | inflexibility |
|        |       | 6         | .00                  | .00       | .00     | .06           |
|        |       | 7         | .00                  | .02       | .00     | .28           |
|        |       | 8         | .38                  | .03       | .00     | .08           |
|        |       | 9         | .16                  | .03       | .01     | .00           |
|        |       | 10        | .00                  | .06       | .02     | .14           |
|        |       | 11        | .08                  | .03       | .00     | .00           |
|        |       | 12        | .13                  | .55       | .00     | .00           |
|        |       | 13        | .05                  | .21       | .12     | .00           |
|        |       | 14        | .01                  | .02       | .75     | .00           |
|        |       | 15        | .03                  | .00       | .01     | .03           |
|        |       | 16        | .02                  | .02       | .06     | .06           |

a. Dependent Variable: psychological\_well\_being

REGRESSION

/MISSING LISTWISE

/STATISTICS COEFF OUTS CI(95) R ANOVA COLLIN TOL CHANGE ZPP

/CRITERIA=PIN(.05) POUT(.10)

/NOORIGIN

/DEPENDENT life\_satisfaction

/METHOD=ENTER age sex extraversion agreeable conscientiousnessneuroticis



m openness

/METHOD=ENTER eudaimonism inclusive externality fear transformative fragility valuing  
inflexibility.

## Regression

### Notes

|                        |                                |                                                                                                                                                                                                                                                                                                                                                                                                                      |
|------------------------|--------------------------------|----------------------------------------------------------------------------------------------------------------------------------------------------------------------------------------------------------------------------------------------------------------------------------------------------------------------------------------------------------------------------------------------------------------------|
| Output Created         |                                | 20-MAY-2019 12:23:01                                                                                                                                                                                                                                                                                                                                                                                                 |
| Comments               |                                |                                                                                                                                                                                                                                                                                                                                                                                                                      |
| Input                  | Data                           | C:\Users\1\Desktop\korea cnada study\merge korea canada\final.sav                                                                                                                                                                                                                                                                                                                                                    |
|                        | Active Dataset                 | DataSet1                                                                                                                                                                                                                                                                                                                                                                                                             |
|                        | Filter                         | <none>                                                                                                                                                                                                                                                                                                                                                                                                               |
|                        | Weight                         | <none>                                                                                                                                                                                                                                                                                                                                                                                                               |
|                        | Split File                     | Nation                                                                                                                                                                                                                                                                                                                                                                                                               |
|                        | N of Rows in Working Data File | 1837                                                                                                                                                                                                                                                                                                                                                                                                                 |
| Missing Value Handling | Definition of Missing          | User-defined missing values are treated as missing.                                                                                                                                                                                                                                                                                                                                                                  |
|                        | Cases Used                     | Statistics are based on cases with no missing values for any variable used.                                                                                                                                                                                                                                                                                                                                          |
| Syntax                 |                                | REGRESSION<br>/MISSING LISTWISE<br>/STATISTICS COEFF<br>OUTS CI(95) R ANOVA<br>COLLIN TOL CHANGE<br>ZPP<br>/CRITERIA=PIN(.05)<br>POUT(.10)<br>/NOORIGIN<br>/DEPENDENT<br>life_satisfaction<br>/METHOD=ENTER age<br>sex extraversion<br>agreeable<br>conscientiousness<br>neuroticism openness<br>/METHOD=ENTER<br>eudaimonism inclusive<br>externality fear<br>transformative fragility<br>valuing<br>inflexibility. |
| Resources              | Processor Time                 | 00:00:00.06                                                                                                                                                                                                                                                                                                                                                                                                          |
|                        | Elapsed Time                   | 00:00:00.05                                                                                                                                                                                                                                                                                                                                                                                                          |

### Notes

|                                               |             |
|-----------------------------------------------|-------------|
| Memory Required                               | 21520 bytes |
| Additional Memory Required for Residual Plots | 0 bytes     |

### Variables Entered/Removed<sup>a</sup>

| Nation | Model | Variables Entered                                                                                         | Variables Removed | Method |
|--------|-------|-----------------------------------------------------------------------------------------------------------|-------------------|--------|
| Korea  | 1     | openness, age, sex, extraversion, neuroticism, conscientiousness, agreeable <sup>b</sup>                  | .                 | Enter  |
|        | 2     | inflexibility, transformative, inclusive, eudaimonism, fragility, valuing, fear, externality <sup>b</sup> | .                 | Enter  |
| Canada | 1     | openness, sex, conscientiousness, extraversion, age, agreeable, neuroticism <sup>b</sup>                  | .                 | Enter  |
|        | 2     | transformative, inclusive, eudaimonism, inflexibility, fragility, valuing, fear, externality <sup>b</sup> | .                 | Enter  |

a. Dependent Variable: life\_satisfaction

b. All requested variables entered.

### Model Summary

| Nation | Model | R                 | R Square | Adjusted R Square | Std. Error of the Estimate | Change ...<br>R Square Change |
|--------|-------|-------------------|----------|-------------------|----------------------------|-------------------------------|
| Korea  | 1     | .402 <sup>a</sup> | .162     | .157              | 1.25414                    | .162                          |
|        | 2     | .518 <sup>b</sup> | .268     | .259              | 1.17551                    | .107                          |
| Canada | 1     | .586 <sup>c</sup> | .343     | .336              | 1.26618                    | .343                          |
|        | 2     | .635 <sup>d</sup> | .403     | .389              | 1.21503                    | .059                          |

### Model Summary

|        |       | Change Statistics |     |      |               |
|--------|-------|-------------------|-----|------|---------------|
| Nation | Model | F Change          | df1 | df2  | Sig. F Change |
| Korea  | 1     | 32.176            | 7   | 1169 | .000          |
|        | 2     | 21.205            | 8   | 1161 | .000          |
| Canada | 1     | 48.694            | 7   | 652  | .000          |
|        | 2     | 8.006             | 8   | 644  | .000          |

- a. Predictors: (Constant), openness, age, sex, extraversion, neuroticism, conscientiousness, agreeable
- b. Predictors: (Constant), openness, age, sex, extraversion, neuroticism, conscientiousness, agreeable, inflexibility, transformative, inclusive, eudaimonism, fragility, valuing, fear, externality
- c. Predictors: (Constant), openness, sex, conscientiousness, extraversion, age, agreeable, neuroticism
- d. Predictors: (Constant), openness, sex, conscientiousness, extraversion, age, agreeable, neuroticism, transformative, inclusive, eudaimonism, inflexibility, fragility, valuing, fear, externality

### ANOVA<sup>a</sup>

| Nation | Model |            | Sum of Squares | df   | Mean Square | F      | Sig.              |
|--------|-------|------------|----------------|------|-------------|--------|-------------------|
| Korea  | 1     | Regression | 354.265        | 7    | 50.609      | 32.176 | .000 <sup>b</sup> |
|        |       | Residual   | 1838.695       | 1169 | 1.573       |        |                   |
|        |       | Total      | 2192.960       | 1176 |             |        |                   |
|        | 2     | Regression | 588.675        | 15   | 39.245      | 28.401 | .000 <sup>c</sup> |
|        |       | Residual   | 1604.285       | 1161 | 1.382       |        |                   |
|        |       | Total      | 2192.960       | 1176 |             |        |                   |
| Canada | 1     | Regression | 546.471        | 7    | 78.067      | 48.694 | .000 <sup>d</sup> |
|        |       | Residual   | 1045.295       | 652  | 1.603       |        |                   |
|        |       | Total      | 1591.766       | 659  |             |        |                   |
|        | 2     | Regression | 641.025        | 15   | 42.735      | 28.947 | .000 <sup>e</sup> |
|        |       | Residual   | 950.741        | 644  | 1.476       |        |                   |
|        |       | Total      | 1591.766       | 659  |             |        |                   |

a. Dependent Variable: life\_satisfaction

b. Predictors: (Constant), openness, age, sex, extraversion, neuroticism, conscientiousness, agreeable

c. Predictors: (Constant), openness, age, sex, extraversion, neuroticism, conscientiousness, agreeable, inflexibility, transformative, inclusive, eudaimonism, fragility, valuing, fear, externality

d. Predictors: (Constant), openness, sex, conscientiousness, extraversion, age, agreeable, neuroticism

e. Predictors: (Constant), openness, sex, conscientiousness, extraversion, age, agreeable, neuroticism, transformative, inclusive, eudaimonism, inflexibility, fragility, valuing, fear, externality

### Coefficients<sup>a</sup>

| Nation         | Model             |                   | Unstandardized Coefficients |            | Standardized Coefficients | t       |        |
|----------------|-------------------|-------------------|-----------------------------|------------|---------------------------|---------|--------|
|                |                   |                   | B                           | Std. Error | Beta                      |         |        |
| Korea          | 1                 | (Constant)        | 2.431                       | .388       |                           | 6.270   |        |
|                |                   | age               | -.007                       | .003       | -.061                     | -2.183  |        |
|                |                   | sex               | .196                        | .075       | .072                      | 2.598   |        |
|                |                   | extraversion      | .378                        | .059       | .198                      | 6.357   |        |
|                |                   | agreeable         | .155                        | .067       | .072                      | 2.304   |        |
|                |                   | conscientiousness | .193                        | .056       | .099                      | 3.447   |        |
|                |                   | neuroticism       | -.507                       | .056       | -.253                     | -8.981  |        |
|                |                   | openness          | .102                        | .058       | .049                      | 1.757   |        |
|                |                   | 2                 | (Constant)                  | 3.631      | .453                      |         | 8.009  |
|                |                   |                   | age                         | -.011      | .003                      | -.094   | -3.489 |
|                | sex               |                   | .145                        | .072       | .053                      | 2.022   |        |
|                | extraversion      |                   | .331                        | .056       | .173                      | 5.897   |        |
|                | agreeable         |                   | .066                        | .064       | .031                      | 1.024   |        |
|                | conscientiousness |                   | .191                        | .053       | .097                      | 3.601   |        |
|                | neuroticism       |                   | -.348                       | .057       | -.174                     | -6.145  |        |
|                | openness          |                   | .091                        | .055       | .044                      | 1.662   |        |
|                | eudaimonism       |                   | -.014                       | .007       | -.054                     | -2.064  |        |
|                | inclusive         |                   | .169                        | .032       | .140                      | 5.305   |        |
|                | externality       | -.200             | .040                        | -.156      | -5.036                    |         |        |
|                | fear              | -.109             | .039                        | -.086      | -2.773                    |         |        |
| transformative | .185              | .035              | .154                        | 5.295      |                           |         |        |
| fragility      | -.222             | .035              | -.172                       | -6.313     |                           |         |        |
| valuing        | -.044             | .054              | -.023                       | -.822      |                           |         |        |
| inflexibility  | .061              | .035              | .048                        | 1.760      |                           |         |        |
| Canada         | 1                 | (Constant)        | 4.243                       | .502       |                           | 8.450   |        |
|                |                   | age               | .002                        | .003       | .019                      | .543    |        |
|                |                   | sex               | .224                        | .109       | .070                      | 2.053   |        |
|                |                   | extraversion      | .215                        | .054       | .135                      | 3.965   |        |
|                |                   | agreeable         | .205                        | .069       | .108                      | 2.976   |        |
|                |                   | conscientiousness | .095                        | .063       | .052                      | 1.509   |        |
|                |                   | neuroticism       | -.804                       | .061       | -.476                     | -13.101 |        |
|                |                   | openness          | -.047                       | .066       | -.024                     | -.717   |        |
|                | 2                 | (Constant)        | 4.796                       | .589       |                           | 8.146   |        |
|                |                   | age               | .003                        | .003       | .026                      | .773    |        |
|                |                   | sex               | .105                        | .106       | .033                      | .989    |        |
|                |                   | extraversion      | .106                        | .054       | .067                      | 1.971   |        |
|                |                   | agreeable         | .157                        | .069       | .082                      | 2.253   |        |

### Coefficients<sup>a</sup>

| Nation         | Model |                   | Sig.  | 95.0% Confidence Interval for B |             | Correlations<br>Zero-order |
|----------------|-------|-------------------|-------|---------------------------------|-------------|----------------------------|
|                |       |                   |       | Lower Bound                     | Upper Bound |                            |
| Korea          | 1     | (Constant)        | .000  | 1.670                           | 3.192       |                            |
|                |       | age               | .029  | -.013                           | -.001       | -.015                      |
|                |       | sex               | .009  | .048                            | .344        | .037                       |
|                |       | extraversion      | .000  | .261                            | .495        | .267                       |
|                |       | agreeable         | .021  | .023                            | .288        | .214                       |
|                |       | conscientiousness | .001  | .083                            | .304        | .178                       |
|                |       | neuroticism       | .000  | -.618                           | -.396       | -.258                      |
|                |       | openness          | .079  | -.012                           | .216        | .138                       |
|                | 2     | (Constant)        | .000  | 2.742                           | 4.521       |                            |
|                |       | age               | .001  | -.017                           | -.005       | -.015                      |
|                |       | sex               | .043  | .004                            | .287        | .037                       |
|                |       | extraversion      | .000  | .221                            | .441        | .267                       |
|                |       | agreeable         | .306  | -.060                           | .192        | .214                       |
|                |       | conscientiousness | .000  | .087                            | .295        | .178                       |
|                |       | neuroticism       | .000  | -.459                           | -.237       | -.258                      |
|                |       | openness          | .097  | -.016                           | .199        | .138                       |
|                |       | eudaimonism       | .039  | -.027                           | -.001       | .017                       |
|                |       | inclusive         | .000  | .107                            | .232        | .218                       |
|                |       | externality       | .000  | -.278                           | -.122       | -.293                      |
|                |       | fear              | .006  | -.186                           | -.032       | -.214                      |
| transformative | .000  | .116              | .254  | .080                            |             |                            |
| fragility      | .000  | -.291             | -.153 | -.220                           |             |                            |
| valuing        | .411  | -.149             | .061  | -.127                           |             |                            |
| inflexibility  | .079  | -.007             | .129  | -.057                           |             |                            |
| Canada         | 1     | (Constant)        | .000  | 3.257                           | 5.229       |                            |
|                |       | age               | .587  | -.005                           | .009        | .192                       |
|                |       | sex               | .041  | .010                            | .438        | .028                       |
|                |       | extraversion      | .000  | .108                            | .321        | .299                       |
|                |       | agreeable         | .003  | .070                            | .341        | .257                       |
|                |       | conscientiousness | .132  | -.029                           | .219        | .261                       |
|                |       | neuroticism       | .000  | -.924                           | -.683       | -.542                      |
|                |       | openness          | .474  | -.178                           | .083        | .067                       |
|                | 2     | (Constant)        | .000  | 3.640                           | 5.953       |                            |
|                |       | age               | .440  | -.004                           | .009        | .192                       |
|                |       | sex               | .323  | -.103                           | .313        | .028                       |
|                |       | extraversion      | .049  | .000                            | .212        | .299                       |
|                |       | agreeable         | .025  | .020                            | .293        | .257                       |

### Coefficients<sup>a</sup>

| Nation         | Model |                   | Correlations |       | Collinearity Statistics |       |
|----------------|-------|-------------------|--------------|-------|-------------------------|-------|
|                |       |                   | Partial      | Part  | Tolerance               | VIF   |
| Korea          | 1     | (Constant)        |              |       |                         |       |
|                |       | age               | -.064        | -.058 | .920                    | 1.086 |
|                |       | sex               | .076         | .070  | .941                    | 1.063 |
|                |       | extraversion      | .183         | .170  | .739                    | 1.354 |
|                |       | agreeable         | .067         | .062  | .730                    | 1.370 |
|                |       | conscientiousness | .100         | .092  | .876                    | 1.142 |
|                |       | neuroticism       | -.254        | -.241 | .903                    | 1.108 |
|                |       | openness          | .051         | .047  | .908                    | 1.101 |
|                | 2     | (Constant)        |              |       |                         |       |
|                |       | age               | -.102        | -.088 | .871                    | 1.148 |
|                |       | sex               | .059         | .051  | .908                    | 1.101 |
|                |       | extraversion      | .171         | .148  | .729                    | 1.372 |
|                |       | agreeable         | .030         | .026  | .702                    | 1.424 |
|                |       | conscientiousness | .105         | .090  | .861                    | 1.161 |
|                |       | neuroticism       | -.177        | -.154 | .789                    | 1.267 |
|                |       | openness          | .049         | .042  | .894                    | 1.118 |
|                |       | eudaimonism       | -.060        | -.052 | .917                    | 1.090 |
|                |       | inclusive         | .154         | .133  | .911                    | 1.097 |
|                |       | externality       | -.146        | -.126 | .655                    | 1.526 |
|                |       | fear              | -.081        | -.070 | .656                    | 1.526 |
| transformative | .154  | .133              | .742         | 1.347 |                         |       |
| fragility      | -.182 | -.158             | .845         | 1.183 |                         |       |
| valuing        | -.024 | -.021             | .803         | 1.246 |                         |       |
| inflexibility  | .052  | .044              | .853         | 1.172 |                         |       |
| Canada         | 1     | (Constant)        |              |       |                         |       |
|                |       | age               | .021         | .017  | .862                    | 1.159 |
|                |       | sex               | .080         | .065  | .876                    | 1.142 |
|                |       | extraversion      | .153         | .126  | .864                    | 1.157 |
|                |       | agreeable         | .116         | .094  | .772                    | 1.296 |
|                |       | conscientiousness | .059         | .048  | .848                    | 1.180 |
|                |       | neuroticism       | -.456        | -.416 | .764                    | 1.310 |
|                |       | openness          | -.028        | -.023 | .922                    | 1.085 |
|                | 2     | (Constant)        |              |       |                         |       |
|                |       | age               | .030         | .024  | .829                    | 1.206 |
|                |       | sex               | .039         | .030  | .852                    | 1.174 |
|                |       | extraversion      | .077         | .060  | .801                    | 1.249 |
|                |       | agreeable         | .088         | .069  | .701                    | 1.426 |
|                |       |                   |              |       |                         |       |

### Coefficients<sup>a</sup>

| Nation | Model             | Unstandardized Coefficients |            | Standardized Coefficients | t       |
|--------|-------------------|-----------------------------|------------|---------------------------|---------|
|        |                   | B                           | Std. Error | Beta                      |         |
|        | conscientiousness | .086                        | .061       | .047                      | 1.397   |
|        | neuroticism       | -.680                       | .064       | -.403                     | -10.558 |
|        | openness          | -.074                       | .065       | -.037                     | -1.140  |
|        | eudaimonism       | -.016                       | .009       | -.057                     | -1.786  |
|        | inclusive         | .150                        | .039       | .127                      | 3.865   |
|        | externality       | -.140                       | .049       | -.119                     | -2.850  |
|        | fear              | -.172                       | .047       | -.154                     | -3.684  |
|        | transformative    | .087                        | .041       | .071                      | 2.093   |
|        | fragility         | -.074                       | .042       | -.062                     | -1.745  |
|        | valuing           | .037                        | .058       | .023                      | .630    |
|        | inflexibility     | .115                        | .045       | .093                      | 2.570   |

### Coefficients<sup>a</sup>

| Nation | Model             | Sig. | 95.0% Confidence Interval for B |             | Correlations |
|--------|-------------------|------|---------------------------------|-------------|--------------|
|        |                   |      | Lower Bound                     | Upper Bound | Zero-order   |
|        | conscientiousness | .163 | -.035                           | .206        | .261         |
|        | neuroticism       | .000 | -.807                           | -.554       | -.542        |
|        | openness          | .255 | -.202                           | .054        | .067         |
|        | eudaimonism       | .075 | -.034                           | .002        | .023         |
|        | inclusive         | .000 | .074                            | .226        | .178         |
|        | externality       | .005 | -.236                           | -.044       | -.322        |
|        | fear              | .000 | -.264                           | -.080       | -.377        |
|        | transformative    | .037 | .005                            | .168        | -.014        |
|        | fragility         | .081 | -.156                           | .009        | -.278        |
|        | valuing           | .529 | -.078                           | .152        | -.225        |
|        | inflexibility     | .010 | .027                            | .202        | -.011        |



### Coefficients<sup>a</sup>

| Nation | Model | Correlations      |       | Collinearity Statistics |      |       |
|--------|-------|-------------------|-------|-------------------------|------|-------|
|        |       | Partial           | Part  | Tolerance               | VIF  |       |
|        |       | conscientiousness | .055  | .043                    | .826 | 1.211 |
|        |       | neuroticism       | -.384 | -.322                   | .637 | 1.569 |
|        |       | openness          | -.045 | -.035                   | .876 | 1.142 |
|        |       | eudaimonism       | -.070 | -.054                   | .904 | 1.106 |
|        |       | inclusive         | .151  | .118                    | .856 | 1.168 |
|        |       | externality       | -.112 | -.087                   | .529 | 1.889 |
|        |       | fear              | -.144 | -.112                   | .530 | 1.888 |
|        |       | transformative    | .082  | .064                    | .807 | 1.238 |
|        |       | fragility         | -.069 | -.053                   | .746 | 1.341 |
|        |       | valuing           | .025  | .019                    | .676 | 1.480 |
|        |       | inflexibility     | .101  | .078                    | .713 | 1.402 |

a. Dependent Variable: life\_satisfaction

### Excluded Variables<sup>a</sup>

| Nation | Model |                | Beta In            | t      | Sig. | Partial Correlation | Collinearity |
|--------|-------|----------------|--------------------|--------|------|---------------------|--------------|
|        |       |                |                    |        |      |                     | Tolerance    |
| Korea  | 1     | eudaimonism    | -.022 <sup>b</sup> | -.802  | .423 | -.023               | .956         |
|        |       | inclusive      | .173 <sup>b</sup>  | 6.442  | .000 | .185                | .961         |
|        |       | externality    | -.206 <sup>b</sup> | -7.539 | .000 | -.215               | .917         |
|        |       | fear           | -.128 <sup>b</sup> | -4.679 | .000 | -.136               | .937         |
|        |       | transformative | .086 <sup>b</sup>  | 3.164  | .002 | .092                | .972         |
|        |       | fragility      | -.176 <sup>b</sup> | -6.584 | .000 | -.189               | .966         |
|        |       | valuing        | -.063 <sup>b</sup> | -2.227 | .026 | -.065               | .906         |
|        |       | inflexibility  | -.017 <sup>b</sup> | -.611  | .542 | -.018               | .973         |
| Canada | 1     | eudaimonism    | -.040 <sup>c</sup> | -1.220 | .223 | -.048               | .925         |
|        |       | inclusive      | .133 <sup>c</sup>  | 4.088  | .000 | .158                | .936         |
|        |       | externality    | -.135 <sup>c</sup> | -3.916 | .000 | -.152               | .832         |
|        |       | fear           | -.162 <sup>c</sup> | -4.605 | .000 | -.178               | .790         |
|        |       | transformative | .017 <sup>c</sup>  | .527   | .599 | .021                | .948         |
|        |       | fragility      | -.105 <sup>c</sup> | -3.128 | .002 | -.122               | .889         |
|        |       | valuing        | -.010 <sup>c</sup> | -.286  | .775 | -.011               | .842         |
|        |       | inflexibility  | .020 <sup>c</sup>  | .607   | .544 | .024                | .918         |

## Excluded Variables<sup>a</sup>

| Nation | Model |                | Collinearity Statistics |                   |
|--------|-------|----------------|-------------------------|-------------------|
|        |       |                | VIF                     | Minimum Tolerance |
| Korea  | 1     | eudaimonism    | 1.045                   | .729              |
|        |       | inclusive      | 1.040                   | .725              |
|        |       | externality    | 1.090                   | .726              |
|        |       | fear           | 1.067                   | .725              |
|        |       | transformative | 1.029                   | .723              |
|        |       | fragility      | 1.035                   | .730              |
|        |       | valuing        | 1.104                   | .730              |
|        |       | inflexibility  | 1.028                   | .721              |
| Canada | 1     | eudaimonism    | 1.081                   | .754              |
|        |       | inclusive      | 1.068                   | .764              |
|        |       | externality    | 1.202                   | .735              |
|        |       | fear           | 1.266                   | .720              |
|        |       | transformative | 1.055                   | .759              |
|        |       | fragility      | 1.125                   | .722              |
|        |       | valuing        | 1.188                   | .693              |
|        |       | inflexibility  | 1.089                   | .744              |

a. Dependent Variable: life\_satisfaction

↳

b. Predictors in the Model: (Constant), openness, age, sex, extraversion, neuroticism, conscientiousness, agreeable

c. Predictors in the Model: (Constant), openness, sex, conscientiousness, extraversion, age, agreeable,

### Collinearity Diagnostics<sup>a</sup>

| Nation | Model | Dimension | Eigenvalue | Condition Index | Variance Proportions |     |     |
|--------|-------|-----------|------------|-----------------|----------------------|-----|-----|
|        |       |           |            |                 | (Constant)           | age | sex |
| Korea  | 1     | 1         | 7.661      | 1.000           | .00                  | .00 | .00 |
|        |       | 2         | .105       | 8.547           | .00                  | .22 | .46 |
|        |       | 3         | .080       | 9.769           | .00                  | .39 | .22 |
|        |       | 4         | .057       | 11.572          | .00                  | .00 | .24 |
|        |       | 5         | .040       | 13.817          | .00                  | .18 | .02 |
|        |       | 6         | .027       | 16.936          | .00                  | .08 | .01 |
|        |       | 7         | .022       | 18.558          | .00                  | .00 | .02 |
|        |       | 8         | .007       | 32.008          | .99                  | .12 | .03 |
|        | 2     | 1         | 15.013     | 1.000           | .00                  | .00 | .00 |
|        |       | 2         | .194       | 8.799           | .00                  | .01 | .01 |
|        |       | 3         | .132       | 10.681          | .00                  | .03 | .20 |
|        |       | 4         | .109       | 11.763          | .00                  | .02 | .02 |
|        |       | 5         | .095       | 12.593          | .00                  | .12 | .17 |
|        |       | 6         | .087       | 13.142          | .00                  | .05 | .23 |
|        |       | 7         | .075       | 14.174          | .00                  | .33 | .11 |
|        |       | 8         | .057       | 16.243          | .00                  | .15 | .02 |
| Canada | 1     | 1         | 7.555      | 1.000           | .00                  | .00 | .00 |
|        |       | 2         | .149       | 7.123           | .00                  | .05 | .04 |
|        |       | 3         | .095       | 8.928           | .00                  | .34 | .06 |
|        |       | 4         | .070       | 10.412          | .00                  | .01 | .51 |
|        |       | 5         | .055       | 11.677          | .00                  | .34 | .16 |
|        |       | 6         | .040       | 13.690          | .00                  | .04 | .01 |
|        |       | 7         | .028       | 16.433          | .00                  | .03 | .16 |
|        |       | 8         | .008       | 30.436          | 1.00                 | .20 | .05 |
|        | 2     | 1         | 14.609     | 1.000           | .00                  | .00 | .00 |
|        |       | 2         | .396       | 6.072           | .00                  | .00 | .00 |
|        |       | 3         | .173       | 9.178           | .00                  | .04 | .02 |
|        |       | 4         | .131       | 10.545          | .00                  | .07 | .00 |
|        |       | 5         | .107       | 11.702          | .00                  | .00 | .11 |

### Collinearity Diagnostics<sup>a</sup>

| Nation | Model | Dimension | Variance Proportions |           |                   |             |
|--------|-------|-----------|----------------------|-----------|-------------------|-------------|
|        |       |           | extraversion         | agreeable | conscientiousness | neuroticism |
| Korea  | 1     | 1         | .00                  | .00       | .00               | .00         |
|        |       | 2         | .00                  | .00       | .02               | .04         |
|        |       | 3         | .13                  | .03       | .00               | .00         |
|        |       | 4         | .09                  | .02       | .00               | .56         |
|        |       | 5         | .32                  | .01       | .20               | .08         |
|        |       | 6         | .00                  | .00       | .56               | .02         |
|        |       | 7         | .46                  | .83       | .05               | .01         |
|        |       | 8         | .00                  | .11       | .17               | .30         |
|        | 2     | 1         | .00                  | .00       | .00               | .00         |
|        |       | 2         | .01                  | .00       | .00               | .00         |
|        |       | 3         | .01                  | .01       | .00               | .02         |
|        |       | 4         | .00                  | .00       | .01               | .00         |
|        |       | 5         | .00                  | .00       | .01               | .01         |
|        |       | 6         | .06                  | .02       | .00               | .00         |
|        |       | 7         | .04                  | .00       | .00               | .00         |
|        |       | 8         | .12                  | .01       | .00               | .02         |
| Canada | 1     | 1         | .00                  | .00       | .00               | .00         |
|        |       | 2         | .16                  | .00       | .01               | .25         |
|        |       | 3         | .45                  | .00       | .02               | .00         |
|        |       | 4         | .21                  | .02       | .02               | .26         |
|        |       | 5         | .11                  | .01       | .16               | .02         |
|        |       | 6         | .03                  | .03       | .54               | .06         |
|        |       | 7         | .02                  | .92       | .02               | .02         |
|        |       | 8         | .03                  | .02       | .22               | .40         |
|        | 2     | 1         | .00                  | .00       | .00               | .00         |
|        |       | 2         | .03                  | .00       | .00               | .00         |
|        |       | 3         | .02                  | .00       | .00               | .05         |
|        |       | 4         | .01                  | .00       | .02               | .00         |
|        |       | 5         | .02                  | .00       | .00               | .10         |

### Collinearity Diagnostics<sup>a</sup>

| Nation | Model | Dimension | Variance Proportions |             |           |             |      |
|--------|-------|-----------|----------------------|-------------|-----------|-------------|------|
|        |       |           | openness             | eudaimonism | inclusive | externality | fear |
| Korea  | 1     | 1         | .00                  |             |           |             |      |
|        |       | 2         | .00                  |             |           |             |      |
|        |       | 3         | .02                  |             |           |             |      |
|        |       | 4         | .00                  |             |           |             |      |
|        |       | 5         | .22                  |             |           |             |      |
|        |       | 6         | .58                  |             |           |             |      |
|        |       | 7         | .03                  |             |           |             |      |
|        |       | 8         | .14                  |             |           |             |      |
|        | 2     | 1         | .00                  | .00         | .00       | .00         | .00  |
|        |       | 2         | .00                  | .04         | .07       | .10         | .14  |
|        |       | 3         | .00                  | .14         | .08       | .01         | .09  |
|        |       | 4         | .00                  | .21         | .68       | .00         | .01  |
|        |       | 5         | .00                  | .12         | .00       | .02         | .07  |
|        |       | 6         | .01                  | .22         | .01       | .07         | .03  |
|        |       | 7         | .01                  | .20         | .06       | .10         | .00  |
|        |       | 8         | .00                  | .01         | .00       | .03         | .23  |
|        | 9     | .00       | .00                  | .02         | .10       | .11         |      |
|        | 10    | .02       | .00                  | .00         | .49       | .22         |      |
|        | 11    | .14       | .01                  | .00         | .00       | .07         |      |
|        | 12    | .11       | .01                  | .02         | .02       | .00         |      |
|        | 13    | .58       | .00                  | .00         | .03       | .01         |      |
|        | 14    | .03       | .00                  | .01         | .01       | .01         |      |
|        | 15    | .00       | .00                  | .02         | .01       | .01         |      |
|        | 16    | .08       | .03                  | .01         | .00       | .00         |      |
| Canada | 1     | 1         | .00                  |             |           |             |      |
|        |       | 2         | .00                  |             |           |             |      |
|        |       | 3         | .00                  |             |           |             |      |
|        |       | 4         | .00                  |             |           |             |      |
|        |       | 5         | .23                  |             |           |             |      |
|        |       | 6         | .40                  |             |           |             |      |
|        |       | 7         | .18                  |             |           |             |      |
|        |       | 8         | .17                  |             |           |             |      |
|        | 2     | 1         | .00                  | .00         | .00       | .00         | .00  |
|        |       | 2         | .00                  | .01         | .01       | .04         | .12  |
|        |       | 3         | .00                  | .01         | .01       | .01         | .01  |
|        |       | 4         | .00                  | .01         | .65       | .00         | .00  |
|        |       | 5         | .00                  | .15         | .00       | .04         | .24  |

### Collinearity Diagnostics<sup>a</sup>

| Nation | Model | Dimension | Variance Proportions |           |         |               |
|--------|-------|-----------|----------------------|-----------|---------|---------------|
|        |       |           | transformative       | fragility | valuing | inflexibility |
| Korea  | 1     | 1         |                      |           |         |               |
|        |       | 2         |                      |           |         |               |
|        |       | 3         |                      |           |         |               |
|        |       | 4         |                      |           |         |               |
|        |       | 5         |                      |           |         |               |
|        |       | 6         |                      |           |         |               |
|        |       | 7         |                      |           |         |               |
|        |       | 8         |                      |           |         |               |
|        | 2     | 1         | .00                  | .00       | .00     | .00           |
|        |       | 2         | .00                  | .00       | .00     | .01           |
|        |       | 3         | .03                  | .00       | .00     | .00           |
|        |       | 4         | .00                  | .00       | .00     | .00           |
|        |       | 5         | .05                  | .00       | .00     | .16           |
|        |       | 6         | .06                  | .01       | .00     | .03           |
|        |       | 7         | .10                  | .01       | .00     | .00           |
|        |       | 8         | .12                  | .08       | .00     | .22           |
|        | 9     | .02       | .04                  | .01       | .39     |               |
|        | 10    | .25       | .01                  | .00       | .05     |               |
|        | 11    | .12       | .10                  | .00       | .03     |               |
|        | 12    | .19       | .63                  | .00       | .01     |               |
|        | 13    | .03       | .00                  | .02       | .00     |               |
|        | 14    | .02       | .02                  | .01       | .00     |               |
|        | 15    | .00       | .03                  | .84       | .02     |               |
|        | 16    | .00       | .05                  | .11       | .07     |               |
| Canada | 1     | 1         |                      |           |         |               |
|        |       | 2         |                      |           |         |               |
|        |       | 3         |                      |           |         |               |
|        |       | 4         |                      |           |         |               |
|        |       | 5         |                      |           |         |               |
|        |       | 6         |                      |           |         |               |
|        |       | 7         |                      |           |         |               |
|        |       | 8         |                      |           |         |               |
|        | 2     | 1         | .00                  | .00       | .00     | .00           |
|        |       | 2         | .00                  | .00       | .00     | .02           |
|        |       | 3         | .03                  | .01       | .00     | .31           |
|        |       | 4         | .00                  | .01       | .00     | .00           |
|        |       | 5         | .10                  | .00       | .01     | .01           |

### Collinearity Diagnostics<sup>a</sup>

| Nation | Model | Dimension | Eigenvalue | Condition Index | Variance Proportions |     |     |
|--------|-------|-----------|------------|-----------------|----------------------|-----|-----|
|        |       |           |            |                 | (Constant)           | age | sex |
|        |       | 6         | .097       | 12.289          | .00                  | .00 | .00 |
|        |       | 7         | .086       | 13.039          | .00                  | .21 | .09 |
|        |       | 8         | .073       | 14.174          | .00                  | .01 | .07 |
|        |       | 9         | .070       | 14.491          | .00                  | .10 | .10 |
|        |       | 10        | .061       | 15.481          | .00                  | .00 | .33 |
|        |       | 11        | .051       | 16.871          | .00                  | .35 | .02 |
|        |       | 12        | .044       | 18.168          | .00                  | .00 | .03 |
|        |       | 13        | .038       | 19.549          | .00                  | .00 | .01 |
|        |       | 14        | .031       | 21.685          | .00                  | .01 | .03 |
|        |       | 15        | .026       | 23.599          | .00                  | .05 | .12 |
|        |       | 16        | .006       | 50.079          | 1.00                 | .15 | .06 |

### Collinearity Diagnostics<sup>a</sup>

| Nation | Model | Dimension | Variance Proportions |           |                   |             |
|--------|-------|-----------|----------------------|-----------|-------------------|-------------|
|        |       |           | extraversion         | agreeable | conscientiousness | neuroticism |
|        |       | 6         | .38                  | .00       | .00               | .00         |
|        |       | 7         | .13                  | .00       | .01               | .01         |
|        |       | 8         | .17                  | .00       | .00               | .06         |
|        |       | 9         | .06                  | .00       | .00               | .01         |
|        |       | 10        | .01                  | .01       | .00               | .19         |
|        |       | 11        | .04                  | .00       | .35               | .05         |
|        |       | 12        | .05                  | .01       | .00               | .08         |
|        |       | 13        | .00                  | .01       | .28               | .03         |
|        |       | 14        | .03                  | .00       | .10               | .27         |
|        |       | 15        | .03                  | .94       | .04               | .00         |
|        |       | 16        | .03                  | .02       | .20               | .14         |

### Collinearity Diagnostics<sup>a</sup>

| Nation | Model | Dimension | Variance Proportions |             |           |             |      |
|--------|-------|-----------|----------------------|-------------|-----------|-------------|------|
|        |       |           | openness             | eudaimonism | inclusive | externality | fear |
|        |       | 6         | .00                  | .40         | .01       | .01         | .08  |
|        |       | 7         | .00                  | .02         | .20       | .06         | .00  |
|        |       | 8         | .01                  | .17         | .00       | .06         | .02  |
|        |       | 9         | .00                  | .00         | .03       | .33         | .44  |
|        |       | 10        | .01                  | .00         | .00       | .36         | .05  |
|        |       | 11        | .08                  | .05         | .00       | .00         | .02  |
|        |       | 12        | .22                  | .12         | .02       | .03         | .00  |
|        |       | 13        | .39                  | .03         | .00       | .00         | .00  |
|        |       | 14        | .07                  | .00         | .07       | .05         | .00  |
|        |       | 15        | .10                  | .01         | .00       | .01         | .02  |
|        |       | 16        | .12                  | .03         | .00       | .00         | .00  |

### Collinearity Diagnostics<sup>a</sup>

| Nation | Model | Dimension | Variance Proportions |           |         |               |
|--------|-------|-----------|----------------------|-----------|---------|---------------|
|        |       |           | transformative       | fragility | valuing | inflexibility |
|        |       | 6         | .00                  | .00       | .00     | .06           |
|        |       | 7         | .00                  | .02       | .00     | .28           |
|        |       | 8         | .38                  | .03       | .00     | .08           |
|        |       | 9         | .16                  | .03       | .01     | .00           |
|        |       | 10        | .00                  | .06       | .02     | .14           |
|        |       | 11        | .08                  | .03       | .00     | .00           |
|        |       | 12        | .13                  | .55       | .00     | .00           |
|        |       | 13        | .05                  | .21       | .12     | .00           |
|        |       | 14        | .01                  | .02       | .75     | .00           |
|        |       | 15        | .03                  | .00       | .01     | .03           |
|        |       | 16        | .02                  | .02       | .06     | .06           |

a. Dependent Variable: life\_satisfaction

REGRESSION

/MISSING LISTWISE

/STATISTICS COEFF OUTS CI(95) R ANOVA COLLIN TOL CHANGE ZPP

/CRITERIA=PIN(.05) POUT(.10)

/NOORIGIN

/DEPENDENT negative\_affect

/METHOD=ENTER age sex extraversion agreeable conscientiousnessneuroticis



m openness

/METHOD=ENTER eudaimonism inclusive externality fear transformative fragility valuing  
inflexibility.

## Regression

### Notes

|                        |                                                                                                                                                                                                                                                                                                                                                                                                                    |                                                                             |
|------------------------|--------------------------------------------------------------------------------------------------------------------------------------------------------------------------------------------------------------------------------------------------------------------------------------------------------------------------------------------------------------------------------------------------------------------|-----------------------------------------------------------------------------|
| Output Created         |                                                                                                                                                                                                                                                                                                                                                                                                                    | 20-MAY-2019 12:23:08                                                        |
| Comments               |                                                                                                                                                                                                                                                                                                                                                                                                                    |                                                                             |
| Input                  | Data                                                                                                                                                                                                                                                                                                                                                                                                               | C:\Users\1\Desktop\korea cnada study\merge korea canada\final.sav           |
|                        | Active Dataset                                                                                                                                                                                                                                                                                                                                                                                                     | DataSet1                                                                    |
|                        | Filter                                                                                                                                                                                                                                                                                                                                                                                                             | <none>                                                                      |
|                        | Weight                                                                                                                                                                                                                                                                                                                                                                                                             | <none>                                                                      |
|                        | Split File                                                                                                                                                                                                                                                                                                                                                                                                         | Nation                                                                      |
|                        | N of Rows in Working Data File                                                                                                                                                                                                                                                                                                                                                                                     | 1837                                                                        |
| Missing Value Handling | Definition of Missing                                                                                                                                                                                                                                                                                                                                                                                              | User-defined missing values are treated as missing.                         |
|                        | Cases Used                                                                                                                                                                                                                                                                                                                                                                                                         | Statistics are based on cases with no missing values for any variable used. |
| Syntax                 | REGRESSION<br>/MISSING LISTWISE<br>/STATISTICS COEFF<br>OUTS CI(95) R ANOVA<br>COLLIN TOL CHANGE<br>ZPP<br>/CRITERIA=PIN(.05)<br>POUT(.10)<br>/NOORIGIN<br>/DEPENDENT<br>negative_affect<br>/METHOD=ENTER age<br>sex extraversion<br>agreeable<br>conscientiousness<br>neuroticism openness<br>/METHOD=ENTER<br>eudaimonism inclusive<br>externality fear<br>transformative fragility<br>valuing<br>inflexibility. |                                                                             |
| Resources              | Processor Time                                                                                                                                                                                                                                                                                                                                                                                                     | 00:00:00.06                                                                 |
|                        | Elapsed Time                                                                                                                                                                                                                                                                                                                                                                                                       | 00:00:00.04                                                                 |

### Notes

|                                               |             |
|-----------------------------------------------|-------------|
| Memory Required                               | 21520 bytes |
| Additional Memory Required for Residual Plots | 0 bytes     |

### Variables Entered/Removed<sup>a</sup>

| Nation | Model | Variables Entered                                                                                         | Variables Removed | Method |
|--------|-------|-----------------------------------------------------------------------------------------------------------|-------------------|--------|
| Korea  | 1     | openness, age, sex, extraversion, neuroticism, conscientiousness, agreeable <sup>b</sup>                  | .                 | Enter  |
|        | 2     | inflexibility, transformative, inclusive, eudaimonism, fragility, valuing, fear, externality <sup>b</sup> | .                 | Enter  |
| Canada | 1     | openness, sex, conscientiousness, extraversion, age, agreeable, neuroticism <sup>b</sup>                  | .                 | Enter  |
|        | 2     | transformative, inclusive, eudaimonism, inflexibility, fragility, valuing, fear, externality <sup>b</sup> | .                 | Enter  |

a. Dependent Variable: negative\_affect

b. All requested variables entered.

### Model Summary

| Nation | Model | R                 | R Square | Adjusted R Square | Std. Error of the Estimate | Change ...<br>R Square Change |
|--------|-------|-------------------|----------|-------------------|----------------------------|-------------------------------|
| Korea  | 1     | .501 <sup>a</sup> | .251     | .247              | .67731                     | .251                          |
|        | 2     | .601 <sup>b</sup> | .362     | .353              | .62759                     | .110                          |
| Canada | 1     | .737 <sup>c</sup> | .543     | .538              | .59867                     | .543                          |
|        | 2     | .770 <sup>d</sup> | .594     | .584              | .56835                     | .050                          |

### Model Summary

|        |       | Change Statistics |     |      |               |
|--------|-------|-------------------|-----|------|---------------|
| Nation | Model | F Change          | df1 | df2  | Sig. F Change |
| Korea  | 1     | 56.101            | 7   | 1169 | .000          |
|        | 2     | 25.071            | 8   | 1161 | .000          |
| Canada | 1     | 110.835           | 7   | 652  | .000          |
|        | 2     | 9.929             | 8   | 644  | .000          |

- a. Predictors: (Constant), openness, age, sex, extraversion, neuroticism, conscientiousness, agreeable
- b. Predictors: (Constant), openness, age, sex, extraversion, neuroticism, conscientiousness, agreeable, inflexibility, transformative, inclusive, eudaimonism, fragility, valuing, fear, externality
- c. Predictors: (Constant), openness, sex, conscientiousness, extraversion, age, agreeable, neuroticism
- d. Predictors: (Constant), openness, sex, conscientiousness, extraversion, age, agreeable, neuroticism, transformative, inclusive, eudaimonism, inflexibility, fragility, valuing, fear, externality

### ANOVA<sup>a</sup>

| Nation | Model |            | Sum of Squares | df   | Mean Square | F       | Sig.              |
|--------|-------|------------|----------------|------|-------------|---------|-------------------|
| Korea  | 1     | Regression | 180.153        | 7    | 25.736      | 56.101  | .000 <sup>b</sup> |
|        |       | Residual   | 536.279        | 1169 | .459        |         |                   |
|        |       | Total      | 716.432        | 1176 |             |         |                   |
|        | 2     | Regression | 259.150        | 15   | 17.277      | 43.864  | .000 <sup>c</sup> |
|        |       | Residual   | 457.282        | 1161 | .394        |         |                   |
|        |       | Total      | 716.432        | 1176 |             |         |                   |
| Canada | 1     | Regression | 278.068        | 7    | 39.724      | 110.835 | .000 <sup>d</sup> |
|        |       | Residual   | 233.682        | 652  | .358        |         |                   |
|        |       | Total      | 511.750        | 659  |             |         |                   |
|        | 2     | Regression | 303.727        | 15   | 20.248      | 62.685  | .000 <sup>e</sup> |
|        |       | Residual   | 208.023        | 644  | .323        |         |                   |
|        |       | Total      | 511.750        | 659  |             |         |                   |

a. Dependent Variable: negative\_affect

b. Predictors: (Constant), openness, age, sex, extraversion, neuroticism, conscientiousness, agreeable

c. Predictors: (Constant), openness, age, sex, extraversion, neuroticism, conscientiousness, agreeable, inflexibility, transformative, inclusive, eudaimonism, fragility, valuing, fear, externality

d. Predictors: (Constant), openness, sex, conscientiousness, extraversion, age, agreeable, neuroticism

e. Predictors: (Constant), openness, sex, conscientiousness, extraversion, age, agreeable, neuroticism, transformative, inclusive, eudaimonism, inflexibility, fragility, valuing, fear, externality

### Coefficients<sup>a</sup>

| Nation            | Model             |                   | Unstandardized Coefficients |            | Standardized Coefficients | t      |        |
|-------------------|-------------------|-------------------|-----------------------------|------------|---------------------------|--------|--------|
|                   |                   |                   | B                           | Std. Error | Beta                      |        |        |
| Korea             | 1                 | (Constant)        | 1.623                       | .209       |                           | 7.749  |        |
|                   |                   | age               | -.004                       | .002       | -.065                     | -2.452 |        |
|                   |                   | sex               | -.101                       | .041       | -.065                     | -2.491 |        |
|                   |                   | extraversion      | -.115                       | .032       | -.105                     | -3.566 |        |
|                   |                   | agreeable         | -.004                       | .036       | -.003                     | -.106  |        |
|                   |                   | conscientiousness | -.080                       | .030       | -.072                     | -2.650 |        |
|                   |                   | neuroticism       | .521                        | .030       | .455                      | 17.086 |        |
|                   |                   | openness          | -.020                       | .031       | -.017                     | -.638  |        |
|                   |                   | 2                 | (Constant)                  | .101       | .242                      |        | .417   |
|                   |                   |                   | age                         | -.005      | .002                      | -.083  | -3.302 |
|                   | sex               |                   | -.053                       | .038       | -.034                     | -1.370 |        |
|                   | extraversion      |                   | -.098                       | .030       | -.090                     | -3.283 |        |
|                   | agreeable         |                   | .027                        | .034       | .022                      | .782   |        |
|                   | conscientiousness |                   | -.082                       | .028       | -.073                     | -2.880 |        |
|                   | neuroticism       |                   | .395                        | .030       | .345                      | 13.075 |        |
|                   | openness          |                   | -.004                       | .029       | -.003                     | -.126  |        |
|                   | eudaimonism       |                   | .010                        | .004       | .070                      | 2.876  |        |
|                   | inclusive         |                   | -.007                       | .017       | -.010                     | -.392  |        |
|                   | Canada            | 1                 | (Constant)                  | 1.585      | .237                      |        | 6.678  |
|                   |                   |                   | age                         | -.009      | .002                      | -.155  | -5.433 |
| sex               |                   |                   | .123                        | .052       | .068                      | 2.392  |        |
| extraversion      |                   |                   | -.076                       | .026       | -.085                     | -2.976 |        |
| agreeable         |                   |                   | -.058                       | .033       | -.053                     | -1.768 |        |
| conscientiousness |                   |                   | -.147                       | .030       | -.141                     | -4.916 |        |
| neuroticism       |                   |                   | .535                        | .029       | .559                      | 18.453 |        |
| openness          |                   |                   | .063                        | .031       | .055                      | 2.007  |        |
| 2                 |                   |                   | (Constant)                  | .588       | .275                      |        | 2.134  |
|                   |                   | age               | -.008                       | .002       | -.147                     | -5.336 |        |
|                   |                   | sex               | .175                        | .050       | .096                      | 3.523  |        |
|                   |                   | extraversion      | -.053                       | .025       | -.059                     | -2.099 |        |
|                   |                   | agreeable         | -.035                       | .033       | -.032                     | -1.062 |        |

### Coefficients<sup>a</sup>

| Nation         | Model |                   | Sig. | 95.0% Confidence Interval for B |             | Correlations<br>Zero-order |
|----------------|-------|-------------------|------|---------------------------------|-------------|----------------------------|
|                |       |                   |      | Lower Bound                     | Upper Bound |                            |
| Korea          | 1     | (Constant)        | .000 | 1.212                           | 2.034       |                            |
|                |       | age               | .014 | -.008                           | -.001       | -.151                      |
|                |       | sex               | .013 | -.181                           | -.022       | .027                       |
|                |       | extraversion      | .000 | -.178                           | -.052       | -.127                      |
|                |       | agreeable         | .916 | -.075                           | .068        | -.087                      |
|                |       | conscientiousness | .008 | -.140                           | -.021       | -.195                      |
|                |       | neuroticism       | .000 | .461                            | .581        | .472                       |
|                |       | openness          | .524 | -.082                           | .042        | -.071                      |
|                | 2     | (Constant)        | .676 | -.374                           | .576        |                            |
|                |       | age               | .001 | -.009                           | -.002       | -.151                      |
|                |       | sex               | .171 | -.128                           | .023        | .027                       |
|                |       | extraversion      | .001 | -.157                           | -.040       | -.127                      |
|                |       | agreeable         | .434 | -.041                           | .094        | -.087                      |
|                |       | conscientiousness | .004 | -.137                           | -.026       | -.195                      |
|                |       | neuroticism       | .000 | .336                            | .454        | .472                       |
|                |       | openness          | .900 | -.061                           | .054        | -.071                      |
|                |       | eudaimonism       | .004 | .003                            | .018        | -.014                      |
|                |       | inclusive         | .695 | -.040                           | .027        | -.073                      |
|                |       | externality       | .000 | .080                            | .163        | .366                       |
|                |       | fear              | .000 | .057                            | .139        | .324                       |
| transformative | .214  | -.060             | .013 | .074                            |             |                            |
| fragility      | .000  | .029              | .103 | .225                            |             |                            |
| valuing        | .000  | .098              | .211 | .307                            |             |                            |
| inflexibility  | .302  | -.056             | .017 | .071                            |             |                            |
| Canada         | 1     | (Constant)        | .000 | 1.119                           | 2.052       |                            |
|                |       | age               | .000 | -.012                           | -.006       | -.381                      |
|                |       | sex               | .017 | .022                            | .224        | .162                       |
|                |       | extraversion      | .003 | -.126                           | -.026       | -.270                      |
|                |       | agreeable         | .078 | -.122                           | .006        | -.201                      |
|                |       | conscientiousness | .000 | -.205                           | -.088       | -.384                      |
|                |       | neuroticism       | .000 | .478                            | .592        | .692                       |
|                |       | openness          | .045 | .001                            | .124        | -.023                      |
|                | 2     | (Constant)        | .033 | .047                            | 1.129       |                            |
|                |       | age               | .000 | -.011                           | -.005       | -.381                      |
|                |       | sex               | .000 | .077                            | .272        | .162                       |
|                |       | extraversion      | .036 | -.103                           | -.003       | -.270                      |
|                |       | agreeable         | .288 | -.098                           | .029        | -.201                      |
|                |       |                   |      |                                 |             |                            |

### Coefficients<sup>a</sup>

| Nation         | Model |                   | Correlations |       | Collinearity Statistics |       |
|----------------|-------|-------------------|--------------|-------|-------------------------|-------|
|                |       |                   | Partial      | Part  | Tolerance               | VIF   |
| Korea          | 1     | (Constant)        |              |       |                         |       |
|                |       | age               | -.072        | -.062 | .920                    | 1.086 |
|                |       | sex               | -.073        | -.063 | .941                    | 1.063 |
|                |       | extraversion      | -.104        | -.090 | .739                    | 1.354 |
|                |       | agreeable         | -.003        | -.003 | .730                    | 1.370 |
|                |       | conscientiousness | -.077        | -.067 | .876                    | 1.142 |
|                |       | neuroticism       | .447         | .432  | .903                    | 1.108 |
|                |       | openness          | -.019        | -.016 | .908                    | 1.101 |
|                | 2     | (Constant)        |              |       |                         |       |
|                |       | age               | -.096        | -.077 | .871                    | 1.148 |
|                |       | sex               | -.040        | -.032 | .908                    | 1.101 |
|                |       | extraversion      | -.096        | -.077 | .729                    | 1.372 |
|                |       | agreeable         | .023         | .018  | .702                    | 1.424 |
|                |       | conscientiousness | -.084        | -.068 | .861                    | 1.161 |
|                |       | neuroticism       | .358         | .307  | .789                    | 1.267 |
|                |       | openness          | -.004        | -.003 | .894                    | 1.118 |
|                |       | eudaimonism       | .084         | .067  | .917                    | 1.090 |
|                |       | inclusive         | -.011        | -.009 | .911                    | 1.097 |
|                |       | externality       | .165         | .134  | .655                    | 1.526 |
|                |       | fear              | .136         | .110  | .656                    | 1.526 |
| transformative | -.036 | -.029             | .742         | 1.347 |                         |       |
| fragility      | .102  | .082              | .845         | 1.183 |                         |       |
| valuing        | .157  | .127              | .803         | 1.246 |                         |       |
| inflexibility  | -.030 | -.024             | .853         | 1.172 |                         |       |
| Canada         | 1     | (Constant)        |              |       |                         |       |
|                |       | age               | -.208        | -.144 | .862                    | 1.159 |
|                |       | sex               | .093         | .063  | .876                    | 1.142 |
|                |       | extraversion      | -.116        | -.079 | .864                    | 1.157 |
|                |       | agreeable         | -.069        | -.047 | .772                    | 1.296 |
|                |       | conscientiousness | -.189        | -.130 | .848                    | 1.180 |
|                |       | neuroticism       | .586         | .488  | .764                    | 1.310 |
|                |       | openness          | .078         | .053  | .922                    | 1.085 |
|                | 2     | (Constant)        |              |       |                         |       |
|                |       | age               | -.206        | -.134 | .829                    | 1.206 |
|                |       | sex               | .138         | .089  | .852                    | 1.174 |
|                |       | extraversion      | -.082        | -.053 | .801                    | 1.249 |
|                |       | agreeable         | -.042        | -.027 | .701                    | 1.426 |
|                |       |                   |              |       |                         |       |

### Coefficients<sup>a</sup>

| Nation | Model             | Unstandardized Coefficients |            | Standardized Coefficients | t      |
|--------|-------------------|-----------------------------|------------|---------------------------|--------|
|        |                   | B                           | Std. Error | Beta                      |        |
|        | conscientiousness | -.119                       | .029       | -.114                     | -4.136 |
|        | neuroticism       | .446                        | .030       | .466                      | 14.807 |
|        | openness          | .076                        | .031       | .067                      | 2.477  |
|        | eudaimonism       | .002                        | .004       | .014                      | .541   |
|        | inclusive         | .013                        | .018       | .019                      | .707   |
|        | externality       | .076                        | .023       | .114                      | 3.307  |
|        | fear              | .064                        | .022       | .101                      | 2.939  |
|        | transformative    | -.003                       | .019       | -.004                     | -.160  |
|        | fragility         | .007                        | .020       | .010                      | .350   |
|        | valuing           | .106                        | .027       | .118                      | 3.866  |
|        | inflexibility     | -.027                       | .021       | -.039                     | -1.303 |

### Coefficients<sup>a</sup>

| Nation | Model             | Sig. | 95.0% Confidence Interval for B |             | Correlations |
|--------|-------------------|------|---------------------------------|-------------|--------------|
|        |                   |      | Lower Bound                     | Upper Bound | Zero-order   |
|        | conscientiousness | .000 | -.175                           | -.062       | -.384        |
|        | neuroticism       | .000 | .387                            | .505        | .692         |
|        | openness          | .014 | .016                            | .135        | -.023        |
|        | eudaimonism       | .589 | -.006                           | .011        | -.037        |
|        | inclusive         | .480 | -.023                           | .048        | .038         |
|        | externality       | .001 | .031                            | .121        | .365         |
|        | fear              | .003 | .021                            | .107        | .412         |
|        | transformative    | .873 | -.041                           | .035        | .135         |
|        | fragility         | .726 | -.032                           | .046        | .289         |
|        | valuing           | .000 | .052                            | .160        | .426         |
|        | inflexibility     | .193 | -.068                           | .014        | .044         |



### Coefficients<sup>a</sup>

| Nation | Model | Correlations      |       | Collinearity Statistics |      |       |
|--------|-------|-------------------|-------|-------------------------|------|-------|
|        |       | Partial           | Part  | Tolerance               | VIF  |       |
|        |       | conscientiousness | -.161 | -.104                   | .826 | 1.211 |
|        |       | neuroticism       | .504  | .372                    | .637 | 1.569 |
|        |       | openness          | .097  | .062                    | .876 | 1.142 |
|        |       | eudaimonism       | .021  | .014                    | .904 | 1.106 |
|        |       | inclusive         | .028  | .018                    | .856 | 1.168 |
|        |       | externality       | .129  | .083                    | .529 | 1.889 |
|        |       | fear              | .115  | .074                    | .530 | 1.888 |
|        |       | transformative    | -.006 | -.004                   | .807 | 1.238 |
|        |       | fragility         | .014  | .009                    | .746 | 1.341 |
|        |       | valuing           | .151  | .097                    | .676 | 1.480 |
|        |       | inflexibility     | -.051 | -.033                   | .713 | 1.402 |

a. Dependent Variable: negative\_affect

### Excluded Variables<sup>a</sup>

| Nation | Model |                | Beta In            | t      | Sig. | Partial Correlation | Collinearity |
|--------|-------|----------------|--------------------|--------|------|---------------------|--------------|
|        |       |                |                    |        |      |                     | Tolerance    |
| Korea  | 1     | eudaimonism    | .061 <sup>b</sup>  | 2.354  | .019 | .069                | .956         |
|        |       | inclusive      | -.006 <sup>b</sup> | -.246  | .805 | -.007               | .961         |
|        |       | externality    | .255 <sup>b</sup>  | 10.040 | .000 | .282                | .917         |
|        |       | fear           | .242 <sup>b</sup>  | 9.633  | .000 | .271                | .937         |
|        |       | transformative | .071 <sup>b</sup>  | 2.757  | .006 | .080                | .972         |
|        |       | fragility      | .151 <sup>b</sup>  | 5.953  | .000 | .172                | .966         |
|        |       | valuing        | .215 <sup>b</sup>  | 8.336  | .000 | .237                | .906         |
|        |       | inflexibility  | .061 <sup>b</sup>  | 2.397  | .017 | .070                | .973         |
| Canada | 1     | eudaimonism    | .005 <sup>c</sup>  | .190   | .850 | .007                | .925         |
|        |       | inclusive      | .056 <sup>c</sup>  | 2.060  | .040 | .080                | .936         |
|        |       | externality    | .189 <sup>c</sup>  | 6.720  | .000 | .255                | .832         |
|        |       | fear           | .182 <sup>c</sup>  | 6.279  | .000 | .239                | .790         |
|        |       | transformative | .056 <sup>c</sup>  | 2.051  | .041 | .080                | .948         |
|        |       | fragility      | .088 <sup>c</sup>  | 3.145  | .002 | .122                | .889         |
|        |       | valuing        | .183 <sup>c</sup>  | 6.547  | .000 | .249                | .842         |
|        |       | inflexibility  | .062 <sup>c</sup>  | 2.239  | .026 | .087                | .918         |

## Excluded Variables<sup>a</sup>

| Nation | Model |                | Collinearity Statistics |                   |
|--------|-------|----------------|-------------------------|-------------------|
|        |       |                | VIF                     | Minimum Tolerance |
| Korea  | 1     | eudaimonism    | 1.045                   | .729              |
|        |       | inclusive      | 1.040                   | .725              |
|        |       | externality    | 1.090                   | .726              |
|        |       | fear           | 1.067                   | .725              |
|        |       | transformative | 1.029                   | .723              |
|        |       | fragility      | 1.035                   | .730              |
|        |       | valuing        | 1.104                   | .730              |
|        |       | inflexibility  | 1.028                   | .721              |
| Canada | 1     | eudaimonism    | 1.081                   | .754              |
|        |       | inclusive      | 1.068                   | .764              |
|        |       | externality    | 1.202                   | .735              |
|        |       | fear           | 1.266                   | .720              |
|        |       | transformative | 1.055                   | .759              |
|        |       | fragility      | 1.125                   | .722              |
|        |       | valuing        | 1.188                   | .693              |
|        |       | inflexibility  | 1.089                   | .744              |

a. Dependent Variable: negative\_affect

↳

b. Predictors in the Model: (Constant), openness, age, sex, extraversion, neuroticism, conscientiousness, agreeable

c. Predictors in the Model: (Constant), openness, sex, conscientiousness, extraversion, age, agreeable,

### Collinearity Diagnostics<sup>a</sup>

| Nation | Model | Dimension | Eigenvalue | Condition Index | Variance Proportions |     |     |
|--------|-------|-----------|------------|-----------------|----------------------|-----|-----|
|        |       |           |            |                 | (Constant)           | age | sex |
| Korea  | 1     | 1         | 7.661      | 1.000           | .00                  | .00 | .00 |
|        |       | 2         | .105       | 8.547           | .00                  | .22 | .46 |
|        |       | 3         | .080       | 9.769           | .00                  | .39 | .22 |
|        |       | 4         | .057       | 11.572          | .00                  | .00 | .24 |
|        |       | 5         | .040       | 13.817          | .00                  | .18 | .02 |
|        |       | 6         | .027       | 16.936          | .00                  | .08 | .01 |
|        |       | 7         | .022       | 18.558          | .00                  | .00 | .02 |
|        |       | 8         | .007       | 32.008          | .99                  | .12 | .03 |
|        | 2     | 1         | 15.013     | 1.000           | .00                  | .00 | .00 |
|        |       | 2         | .194       | 8.799           | .00                  | .01 | .01 |
|        |       | 3         | .132       | 10.681          | .00                  | .03 | .20 |
|        |       | 4         | .109       | 11.763          | .00                  | .02 | .02 |
|        |       | 5         | .095       | 12.593          | .00                  | .12 | .17 |
|        |       | 6         | .087       | 13.142          | .00                  | .05 | .23 |
|        |       | 7         | .075       | 14.174          | .00                  | .33 | .11 |
|        |       | 8         | .057       | 16.243          | .00                  | .15 | .02 |
|        | 9     | .054      | 16.706     | .00             | .06                  | .11 |     |
|        | 10    | .044      | 18.477     | .00             | .00                  | .00 |     |
|        | 11    | .041      | 19.092     | .00             | .05                  | .05 |     |
|        | 12    | .030      | 22.306     | .00             | .03                  | .00 |     |
|        | 13    | .026      | 23.802     | .00             | .09                  | .00 |     |
|        | 14    | .022      | 26.408     | .00             | .00                  | .01 |     |
|        | 15    | .017      | 29.438     | .00             | .02                  | .03 |     |
|        | 16    | .005      | 54.024     | .99             | .04                  | .04 |     |
| Canada | 1     | 1         | 7.555      | 1.000           | .00                  | .00 | .00 |
|        |       | 2         | .149       | 7.123           | .00                  | .05 | .04 |
|        |       | 3         | .095       | 8.928           | .00                  | .34 | .06 |
|        |       | 4         | .070       | 10.412          | .00                  | .01 | .51 |
|        |       | 5         | .055       | 11.677          | .00                  | .34 | .16 |
|        |       | 6         | .040       | 13.690          | .00                  | .04 | .01 |
|        |       | 7         | .028       | 16.433          | .00                  | .03 | .16 |
|        |       | 8         | .008       | 30.436          | 1.00                 | .20 | .05 |
|        | 2     | 1         | 14.609     | 1.000           | .00                  | .00 | .00 |
|        |       | 2         | .396       | 6.072           | .00                  | .00 | .00 |
|        |       | 3         | .173       | 9.178           | .00                  | .04 | .02 |
|        |       | 4         | .131       | 10.545          | .00                  | .07 | .00 |
|        |       | 5         | .107       | 11.702          | .00                  | .00 | .11 |

### Collinearity Diagnostics<sup>a</sup>

| Nation | Model | Dimension | Variance Proportions |           |                   |             |
|--------|-------|-----------|----------------------|-----------|-------------------|-------------|
|        |       |           | extraversion         | agreeable | conscientiousness | neuroticism |
| Korea  | 1     | 1         | .00                  | .00       | .00               | .00         |
|        |       | 2         | .00                  | .00       | .02               | .04         |
|        |       | 3         | .13                  | .03       | .00               | .00         |
|        |       | 4         | .09                  | .02       | .00               | .56         |
|        |       | 5         | .32                  | .01       | .20               | .08         |
|        |       | 6         | .00                  | .00       | .56               | .02         |
|        |       | 7         | .46                  | .83       | .05               | .01         |
|        |       | 8         | .00                  | .11       | .17               | .30         |
|        | 2     | 1         | .00                  | .00       | .00               | .00         |
|        |       | 2         | .01                  | .00       | .00               | .00         |
|        |       | 3         | .01                  | .01       | .00               | .02         |
|        |       | 4         | .00                  | .00       | .01               | .00         |
|        |       | 5         | .00                  | .00       | .01               | .01         |
|        |       | 6         | .06                  | .02       | .00               | .00         |
|        |       | 7         | .04                  | .00       | .00               | .00         |
|        |       | 8         | .12                  | .01       | .00               | .02         |
| Canada | 1     | 1         | .00                  | .00       | .00               | .00         |
|        |       | 2         | .16                  | .00       | .01               | .25         |
|        |       | 3         | .45                  | .00       | .02               | .00         |
|        |       | 4         | .21                  | .02       | .02               | .26         |
|        |       | 5         | .11                  | .01       | .16               | .02         |
|        |       | 6         | .03                  | .03       | .54               | .06         |
|        |       | 7         | .02                  | .92       | .02               | .02         |
|        |       | 8         | .03                  | .02       | .22               | .40         |
|        | 2     | 1         | .00                  | .00       | .00               | .00         |
|        |       | 2         | .03                  | .00       | .00               | .00         |
|        |       | 3         | .02                  | .00       | .00               | .05         |
|        |       | 4         | .01                  | .00       | .02               | .00         |
|        |       | 5         | .02                  | .00       | .00               | .10         |

### Collinearity Diagnostics<sup>a</sup>

| Nation | Model | Dimension | Variance Proportions |             |           |             |      |
|--------|-------|-----------|----------------------|-------------|-----------|-------------|------|
|        |       |           | openness             | eudaimonism | inclusive | externality | fear |
| Korea  | 1     | 1         | .00                  |             |           |             |      |
|        |       | 2         | .00                  |             |           |             |      |
|        |       | 3         | .02                  |             |           |             |      |
|        |       | 4         | .00                  |             |           |             |      |
|        |       | 5         | .22                  |             |           |             |      |
|        |       | 6         | .58                  |             |           |             |      |
|        |       | 7         | .03                  |             |           |             |      |
|        |       | 8         | .14                  |             |           |             |      |
|        | 2     | 1         | .00                  | .00         | .00       | .00         | .00  |
|        |       | 2         | .00                  | .04         | .07       | .10         | .14  |
|        |       | 3         | .00                  | .14         | .08       | .01         | .09  |
|        |       | 4         | .00                  | .21         | .68       | .00         | .01  |
|        |       | 5         | .00                  | .12         | .00       | .02         | .07  |
|        |       | 6         | .01                  | .22         | .01       | .07         | .03  |
|        |       | 7         | .01                  | .20         | .06       | .10         | .00  |
|        |       | 8         | .00                  | .01         | .00       | .03         | .23  |
| Canada | 1     | 1         | .00                  |             |           |             |      |
|        |       | 2         | .00                  |             |           |             |      |
|        |       | 3         | .00                  |             |           |             |      |
|        |       | 4         | .00                  |             |           |             |      |
|        |       | 5         | .23                  |             |           |             |      |
|        |       | 6         | .40                  |             |           |             |      |
|        |       | 7         | .18                  |             |           |             |      |
|        |       | 8         | .17                  |             |           |             |      |
|        | 2     | 1         | .00                  | .00         | .00       | .00         | .00  |
|        |       | 2         | .00                  | .01         | .01       | .04         | .12  |
|        |       | 3         | .00                  | .01         | .01       | .01         | .01  |
|        |       | 4         | .00                  | .01         | .65       | .00         | .00  |
|        |       | 5         | .00                  | .15         | .00       | .04         | .24  |

### Collinearity Diagnostics<sup>a</sup>

| Nation | Model | Dimension | Variance Proportions |           |         |               |     |
|--------|-------|-----------|----------------------|-----------|---------|---------------|-----|
|        |       |           | transformative       | fragility | valuing | inflexibility |     |
| Korea  | 1     | 1         |                      |           |         |               |     |
|        |       | 2         |                      |           |         |               |     |
|        |       | 3         |                      |           |         |               |     |
|        |       | 4         |                      |           |         |               |     |
|        |       | 5         |                      |           |         |               |     |
|        |       | 6         |                      |           |         |               |     |
|        |       | 7         |                      |           |         |               |     |
|        |       | 8         |                      |           |         |               |     |
|        | 2     | 1         |                      | .00       | .00     | .00           | .00 |
|        |       | 2         |                      | .00       | .00     | .00           | .01 |
|        |       | 3         |                      | .03       | .00     | .00           | .00 |
|        |       | 4         |                      | .00       | .00     | .00           | .00 |
|        |       | 5         |                      | .05       | .00     | .00           | .16 |
|        |       | 6         |                      | .06       | .01     | .00           | .03 |
|        |       | 7         |                      | .10       | .01     | .00           | .00 |
|        |       | 8         |                      | .12       | .08     | .00           | .22 |
| Canada | 1     | 1         |                      |           |         |               |     |
|        |       | 2         |                      |           |         |               |     |
|        |       | 3         |                      |           |         |               |     |
|        |       | 4         |                      |           |         |               |     |
|        |       | 5         |                      |           |         |               |     |
|        |       | 6         |                      |           |         |               |     |
|        |       | 7         |                      |           |         |               |     |
|        |       | 8         |                      |           |         |               |     |
|        | 2     | 1         |                      | .00       | .00     | .00           | .00 |
|        |       | 2         |                      | .00       | .00     | .00           | .02 |
|        |       | 3         |                      | .03       | .01     | .00           | .31 |
|        |       | 4         |                      | .00       | .01     | .00           | .00 |
|        |       | 5         |                      | .10       | .00     | .01           | .01 |

### Collinearity Diagnostics<sup>a</sup>

| Nation | Model | Dimension | Eigenvalue | Condition Index | Variance Proportions |     |     |
|--------|-------|-----------|------------|-----------------|----------------------|-----|-----|
|        |       |           |            |                 | (Constant)           | age | sex |
|        |       | 6         | .097       | 12.289          | .00                  | .00 | .00 |
|        |       | 7         | .086       | 13.039          | .00                  | .21 | .09 |
|        |       | 8         | .073       | 14.174          | .00                  | .01 | .07 |
|        |       | 9         | .070       | 14.491          | .00                  | .10 | .10 |
|        |       | 10        | .061       | 15.481          | .00                  | .00 | .33 |
|        |       | 11        | .051       | 16.871          | .00                  | .35 | .02 |
|        |       | 12        | .044       | 18.168          | .00                  | .00 | .03 |
|        |       | 13        | .038       | 19.549          | .00                  | .00 | .01 |
|        |       | 14        | .031       | 21.685          | .00                  | .01 | .03 |
|        |       | 15        | .026       | 23.599          | .00                  | .05 | .12 |
|        |       | 16        | .006       | 50.079          | 1.00                 | .15 | .06 |

### Collinearity Diagnostics<sup>a</sup>

| Nation | Model | Dimension | Variance Proportions |           |                   |             |
|--------|-------|-----------|----------------------|-----------|-------------------|-------------|
|        |       |           | extraversion         | agreeable | conscientiousness | neuroticism |
|        |       | 6         | .38                  | .00       | .00               | .00         |
|        |       | 7         | .13                  | .00       | .01               | .01         |
|        |       | 8         | .17                  | .00       | .00               | .06         |
|        |       | 9         | .06                  | .00       | .00               | .01         |
|        |       | 10        | .01                  | .01       | .00               | .19         |
|        |       | 11        | .04                  | .00       | .35               | .05         |
|        |       | 12        | .05                  | .01       | .00               | .08         |
|        |       | 13        | .00                  | .01       | .28               | .03         |
|        |       | 14        | .03                  | .00       | .10               | .27         |
|        |       | 15        | .03                  | .94       | .04               | .00         |
|        |       | 16        | .03                  | .02       | .20               | .14         |

### Collinearity Diagnostics<sup>a</sup>

| Nation | Model | Dimension | Variance Proportions |             |           |             |      |
|--------|-------|-----------|----------------------|-------------|-----------|-------------|------|
|        |       |           | openness             | eudaimonism | inclusive | externality | fear |
|        |       | 6         | .00                  | .40         | .01       | .01         | .08  |
|        |       | 7         | .00                  | .02         | .20       | .06         | .00  |
|        |       | 8         | .01                  | .17         | .00       | .06         | .02  |
|        |       | 9         | .00                  | .00         | .03       | .33         | .44  |
|        |       | 10        | .01                  | .00         | .00       | .36         | .05  |
|        |       | 11        | .08                  | .05         | .00       | .00         | .02  |
|        |       | 12        | .22                  | .12         | .02       | .03         | .00  |
|        |       | 13        | .39                  | .03         | .00       | .00         | .00  |
|        |       | 14        | .07                  | .00         | .07       | .05         | .00  |
|        |       | 15        | .10                  | .01         | .00       | .01         | .02  |
|        |       | 16        | .12                  | .03         | .00       | .00         | .00  |

### Collinearity Diagnostics<sup>a</sup>

| Nation | Model | Dimension | Variance Proportions |           |         |               |
|--------|-------|-----------|----------------------|-----------|---------|---------------|
|        |       |           | transformative       | fragility | valuing | inflexibility |
|        |       | 6         | .00                  | .00       | .00     | .06           |
|        |       | 7         | .00                  | .02       | .00     | .28           |
|        |       | 8         | .38                  | .03       | .00     | .08           |
|        |       | 9         | .16                  | .03       | .01     | .00           |
|        |       | 10        | .00                  | .06       | .02     | .14           |
|        |       | 11        | .08                  | .03       | .00     | .00           |
|        |       | 12        | .13                  | .55       | .00     | .00           |
|        |       | 13        | .05                  | .21       | .12     | .00           |
|        |       | 14        | .01                  | .02       | .75     | .00           |
|        |       | 15        | .03                  | .00       | .01     | .03           |
|        |       | 16        | .02                  | .02       | .06     | .06           |

a. Dependent Variable: negative\_affect

REGRESSION

/MISSING LISTWISE

/STATISTICS COEFF OUTS CI(95) R ANOVA COLLIN TOL CHANGE ZPP

/CRITERIA=PIN(.05) POUT(.10)

/NOORIGIN

/DEPENDENT positive\_affect

/METHOD=ENTER age sex extraversion agreeable conscientiousnessneuroticis



m openness

/METHOD=ENTER eudaimonism inclusive externality fear transformative fragility valuing  
inflexibility.

## Regression

### Notes

|                        |                                |                                                                                                                                                                                                                                                                                                                                                                                                                    |
|------------------------|--------------------------------|--------------------------------------------------------------------------------------------------------------------------------------------------------------------------------------------------------------------------------------------------------------------------------------------------------------------------------------------------------------------------------------------------------------------|
| Output Created         |                                | 20-MAY-2019 12:23:17                                                                                                                                                                                                                                                                                                                                                                                               |
| Comments               |                                |                                                                                                                                                                                                                                                                                                                                                                                                                    |
| Input                  | Data                           | C:\Users\1\Desktop\korea cnada study\merge korea canada\final.sav                                                                                                                                                                                                                                                                                                                                                  |
|                        | Active Dataset                 | DataSet1                                                                                                                                                                                                                                                                                                                                                                                                           |
|                        | Filter                         | <none>                                                                                                                                                                                                                                                                                                                                                                                                             |
|                        | Weight                         | <none>                                                                                                                                                                                                                                                                                                                                                                                                             |
|                        | Split File                     | Nation                                                                                                                                                                                                                                                                                                                                                                                                             |
|                        | N of Rows in Working Data File | 1837                                                                                                                                                                                                                                                                                                                                                                                                               |
| Missing Value Handling | Definition of Missing          | User-defined missing values are treated as missing.                                                                                                                                                                                                                                                                                                                                                                |
|                        | Cases Used                     | Statistics are based on cases with no missing values for any variable used.                                                                                                                                                                                                                                                                                                                                        |
| Syntax                 |                                | REGRESSION<br>/MISSING LISTWISE<br>/STATISTICS COEFF<br>OUTS CI(95) R ANOVA<br>COLLIN TOL CHANGE<br>ZPP<br>/CRITERIA=PIN(.05)<br>POUT(.10)<br>/NOORIGIN<br>/DEPENDENT<br>positive_affect<br>/METHOD=ENTER age<br>sex extraversion<br>agreeable<br>conscientiousness<br>neuroticism openness<br>/METHOD=ENTER<br>eudaimonism inclusive<br>externality fear<br>transformative fragility<br>valuing<br>inflexibility. |
| Resources              | Processor Time                 | 00:00:00.06                                                                                                                                                                                                                                                                                                                                                                                                        |
|                        | Elapsed Time                   | 00:00:00.04                                                                                                                                                                                                                                                                                                                                                                                                        |

### Notes

|                                               |             |
|-----------------------------------------------|-------------|
| Memory Required                               | 21520 bytes |
| Additional Memory Required for Residual Plots | 0 bytes     |

### Variables Entered/Removed<sup>a</sup>

| Nation | Model | Variables Entered                                                                                         | Variables Removed | Method |
|--------|-------|-----------------------------------------------------------------------------------------------------------|-------------------|--------|
| Korea  | 1     | openness, age, sex, extraversion, neuroticism, conscientiousness, agreeable <sup>b</sup>                  | .                 | Enter  |
|        | 2     | inflexibility, transformative, inclusive, eudaimonism, fragility, valuing, fear, externality <sup>b</sup> | .                 | Enter  |
| Canada | 1     | openness, sex, conscientiousness, extraversion, age, agreeable, neuroticism <sup>b</sup>                  | .                 | Enter  |
|        | 2     | transformative, inclusive, eudaimonism, inflexibility, fragility, valuing, fear, externality <sup>b</sup> | .                 | Enter  |

a. Dependent Variable: positive\_affect

b. All requested variables entered.

### Model Summary

| Nation | Model | R                 | R Square | Adjusted R Square | Std. Error of the Estimate | Change ...<br>R Square Change |
|--------|-------|-------------------|----------|-------------------|----------------------------|-------------------------------|
| Korea  | 1     | .432 <sup>a</sup> | .186     | .181              | .67855                     | .186                          |
|        | 2     | .542 <sup>b</sup> | .294     | .285              | .63413                     | .108                          |
| Canada | 1     | .678 <sup>c</sup> | .460     | .454              | .63730                     | .460                          |
|        | 2     | .731 <sup>d</sup> | .534     | .523              | .59547                     | .074                          |

### Model Summary

|        |       | Change Statistics |     |      |               |
|--------|-------|-------------------|-----|------|---------------|
| Nation | Model | F Change          | df1 | df2  | Sig. F Change |
| Korea  | 1     | 38.223            | 7   | 1169 | .000          |
|        | 2     | 22.187            | 8   | 1161 | .000          |
| Canada | 1     | 79.240            | 7   | 652  | .000          |
|        | 2     | 12.853            | 8   | 644  | .000          |

- a. Predictors: (Constant), openness, age, sex, extraversion, neuroticism, conscientiousness, agreeable
- b. Predictors: (Constant), openness, age, sex, extraversion, neuroticism, conscientiousness, agreeable, inflexibility, transformative, inclusive, eudaimonism, fragility, valuing, fear, externality
- c. Predictors: (Constant), openness, sex, conscientiousness, extraversion, age, agreeable, neuroticism
- d. Predictors: (Constant), openness, sex, conscientiousness, extraversion, age, agreeable, neuroticism, transformative, inclusive, eudaimonism, inflexibility, fragility, valuing, fear, externality

### ANOVA<sup>a</sup>

| Nation | Model |            | Sum of Squares | df   | Mean Square | F      | Sig.              |
|--------|-------|------------|----------------|------|-------------|--------|-------------------|
| Korea  | 1     | Regression | 123.193        | 7    | 17.599      | 38.223 | .000 <sup>b</sup> |
|        |       | Residual   | 538.244        | 1169 | .460        |        |                   |
|        |       | Total      | 661.438        | 1176 |             |        |                   |
|        | 2     | Regression | 194.570        | 15   | 12.971      | 32.257 | .000 <sup>c</sup> |
|        |       | Residual   | 466.868        | 1161 | .402        |        |                   |
|        |       | Total      | 661.438        | 1176 |             |        |                   |
| Canada | 1     | Regression | 225.283        | 7    | 32.183      | 79.240 | .000 <sup>d</sup> |
|        |       | Residual   | 264.811        | 652  | .406        |        |                   |
|        |       | Total      | 490.093        | 659  |             |        |                   |
|        | 2     | Regression | 261.742        | 15   | 17.449      | 49.211 | .000 <sup>e</sup> |
|        |       | Residual   | 228.351        | 644  | .355        |        |                   |
|        |       | Total      | 490.093        | 659  |             |        |                   |

a. Dependent Variable: positive\_affect

b. Predictors: (Constant), openness, age, sex, extraversion, neuroticism, conscientiousness, agreeable

c. Predictors: (Constant), openness, age, sex, extraversion, neuroticism, conscientiousness, agreeable, inflexibility, transformative, inclusive, eudaimonism, fragility, valuing, fear, externality

d. Predictors: (Constant), openness, sex, conscientiousness, extraversion, age, agreeable, neuroticism

e. Predictors: (Constant), openness, sex, conscientiousness, extraversion, age, agreeable, neuroticism, transformative, inclusive, eudaimonism, inflexibility, fragility, valuing, fear, externality

### Coefficients<sup>a</sup>

| Nation         | Model             |                   | Unstandardized Coefficients |            | Standardized Coefficients | t       |        |
|----------------|-------------------|-------------------|-----------------------------|------------|---------------------------|---------|--------|
|                |                   |                   | B                           | Std. Error | Beta                      |         |        |
| Korea          | 1                 | (Constant)        | 2.155                       | .210       |                           | 10.271  |        |
|                |                   | age               | .000                        | .002       | .006                      | .231    |        |
|                |                   | sex               | .058                        | .041       | .039                      | 1.416   |        |
|                |                   | extraversion      | .283                        | .032       | .270                      | 8.793   |        |
|                |                   | agreeable         | .042                        | .036       | .036                      | 1.163   |        |
|                |                   | conscientiousness | .055                        | .030       | .051                      | 1.807   |        |
|                |                   | neuroticism       | -.286                       | .031       | -.260                     | -9.365  |        |
|                |                   | openness          | .092                        | .031       | .081                      | 2.919   |        |
|                |                   | 2                 | (Constant)                  | 2.823      | .245                      |         | 11.543 |
|                |                   |                   | age                         | -.001      | .002                      | -.019   | -.703  |
|                | sex               |                   | .025                        | .039       | .016                      | .633    |        |
|                | extraversion      |                   | .262                        | .030       | .250                      | 8.656   |        |
|                | agreeable         |                   | -.021                       | .035       | -.017                     | -.594   |        |
|                | conscientiousness |                   | .047                        | .029       | .044                      | 1.658   |        |
|                | neuroticism       |                   | -.211                       | .031       | -.192                     | -6.906  |        |
|                | openness          |                   | .086                        | .030       | .076                      | 2.900   |        |
|                | eudaimonism       |                   | -.013                       | .004       | -.091                     | -3.518  |        |
|                | inclusive         |                   | .098                        | .017       | .147                      | 5.682   |        |
|                | externality       | -.093             | .021                        | -.132      | -4.337                    |         |        |
|                | fear              | -.100             | .021                        | -.144      | -4.729                    |         |        |
| transformative | .109              | .019              | .165                        | 5.759      |                           |         |        |
| fragility      | -.092             | .019              | -.130                       | -4.850     |                           |         |        |
| valuing        | -.003             | .029              | -.003                       | -.099      |                           |         |        |
| inflexibility  | .011              | .019              | .016                        | .595       |                           |         |        |
| Canada         | 1                 | (Constant)        | 3.427                       | .253       |                           | 13.560  |        |
|                |                   | age               | -.001                       | .002       | -.026                     | -.844   |        |
|                |                   | sex               | .035                        | .055       | .019                      | .634    |        |
|                |                   | extraversion      | .156                        | .027       | .177                      | 5.714   |        |
|                |                   | agreeable         | .116                        | .035       | .110                      | 3.343   |        |
|                |                   | conscientiousness | .093                        | .032       | .092                      | 2.945   |        |
|                |                   | neuroticism       | -.511                       | .031       | -.546                     | -16.559 |        |
|                |                   | openness          | -.027                       | .033       | -.024                     | -.807   |        |
|                | 2                 | (Constant)        | 3.647                       | .289       |                           | 12.638  |        |
|                |                   | age               | -.001                       | .002       | -.015                     | -.491   |        |
|                |                   | sex               | -.041                       | .052       | -.023                     | -.797   |        |
|                |                   | extraversion      | .091                        | .026       | .103                      | 3.430   |        |
|                |                   | agreeable         | .071                        | .034       | .067                      | 2.074   |        |

### Coefficients<sup>a</sup>

| Nation         | Model |                   | Sig.  | 95.0% Confidence Interval for B |             | Correlations<br>Zero-order |
|----------------|-------|-------------------|-------|---------------------------------|-------------|----------------------------|
|                |       |                   |       | Lower Bound                     | Upper Bound |                            |
| Korea          | 1     | (Constant)        | .000  | 1.743                           | 2.566       |                            |
|                |       | age               | .817  | -.003                           | .004        | .044                       |
|                |       | sex               | .157  | -.022                           | .138        | -.001                      |
|                |       | extraversion      | .000  | .220                            | .346        | .317                       |
|                |       | agreeable         | .245  | -.029                           | .114        | .205                       |
|                |       | conscientiousness | .071  | -.005                           | .114        | .158                       |
|                |       | neuroticism       | .000  | -.346                           | -.226       | -.274                      |
|                |       | openness          | .004  | .030                            | .153        | .167                       |
|                | 2     | (Constant)        | .000  | 2.343                           | 3.303       |                            |
|                |       | age               | .482  | -.004                           | .002        | .044                       |
|                |       | sex               | .527  | -.052                           | .101        | -.001                      |
|                |       | extraversion      | .000  | .203                            | .321        | .317                       |
|                |       | agreeable         | .553  | -.089                           | .048        | .205                       |
|                |       | conscientiousness | .098  | -.009                           | .104        | .158                       |
|                |       | neuroticism       | .000  | -.271                           | -.151       | -.274                      |
|                |       | openness          | .004  | .028                            | .144        | .167                       |
|                |       | eudaimonism       | .000  | -.020                           | -.006       | -.004                      |
|                |       | inclusive         | .000  | .064                            | .131        | .227                       |
|                |       | externality       | .000  | -.135                           | -.051       | -.300                      |
|                |       | fear              | .000  | -.142                           | -.059       | -.246                      |
| transformative | .000  | .072              | .146  | .085                            |             |                            |
| fragility      | .000  | -.129             | -.055 | -.193                           |             |                            |
| valuing        | .921  | -.060             | .054  | -.105                           |             |                            |
| inflexibility  | .552  | -.026             | .048  | -.078                           |             |                            |
| Canada         | 1     | (Constant)        | .000  | 2.931                           | 3.923       |                            |
|                |       | age               | .399  | -.005                           | .002        | .188                       |
|                |       | sex               | .527  | -.073                           | .143        | -.024                      |
|                |       | extraversion      | .000  | .102                            | .209        | .359                       |
|                |       | agreeable         | .001  | .048                            | .184        | .274                       |
|                |       | conscientiousness | .003  | .031                            | .156        | .326                       |
|                |       | neuroticism       | .000  | -.572                           | -.451       | -.630                      |
|                |       | openness          | .420  | -.092                           | .039        | .084                       |
|                | 2     | (Constant)        | .000  | 3.080                           | 4.213       |                            |
|                |       | age               | .623  | -.004                           | .002        | .188                       |
|                |       | sex               | .426  | -.143                           | .061        | -.024                      |
|                |       | extraversion      | .001  | .039                            | .143        | .359                       |
|                |       | agreeable         | .039  | .004                            | .137        | .274                       |
|                |       |                   |       |                                 |             |                            |

### Coefficients<sup>a</sup>

| Nation         | Model |                   | Correlations |       | Collinearity Statistics |       |
|----------------|-------|-------------------|--------------|-------|-------------------------|-------|
|                |       |                   | Partial      | Part  | Tolerance               | VIF   |
| Korea          | 1     | (Constant)        |              |       |                         |       |
|                |       | age               | .007         | .006  | .920                    | 1.086 |
|                |       | sex               | .041         | .037  | .941                    | 1.063 |
|                |       | extraversion      | .249         | .232  | .739                    | 1.354 |
|                |       | agreeable         | .034         | .031  | .730                    | 1.370 |
|                |       | conscientiousness | .053         | .048  | .876                    | 1.142 |
|                |       | neuroticism       | -.264        | -.247 | .903                    | 1.108 |
|                |       | openness          | .085         | .077  | .908                    | 1.101 |
|                | 2     | (Constant)        |              |       |                         |       |
|                |       | age               | -.021        | -.017 | .871                    | 1.148 |
|                |       | sex               | .019         | .016  | .908                    | 1.101 |
|                |       | extraversion      | .246         | .213  | .729                    | 1.372 |
|                |       | agreeable         | -.017        | -.015 | .702                    | 1.424 |
|                |       | conscientiousness | .049         | .041  | .861                    | 1.161 |
|                |       | neuroticism       | -.199        | -.170 | .789                    | 1.267 |
|                |       | openness          | .085         | .072  | .894                    | 1.118 |
|                |       | eudaimonism       | -.103        | -.087 | .917                    | 1.090 |
|                |       | inclusive         | .164         | .140  | .911                    | 1.097 |
|                |       | externality       | -.126        | -.107 | .655                    | 1.526 |
|                |       | fear              | -.137        | -.117 | .656                    | 1.526 |
| transformative | .167  | .142              | .742         | 1.347 |                         |       |
| fragility      | -.141 | -.120             | .845         | 1.183 |                         |       |
| valuing        | -.003 | -.002             | .803         | 1.246 |                         |       |
| inflexibility  | .017  | .015              | .853         | 1.172 |                         |       |
| Canada         | 1     | (Constant)        |              |       |                         |       |
|                |       | age               | -.033        | -.024 | .862                    | 1.159 |
|                |       | sex               | .025         | .018  | .876                    | 1.142 |
|                |       | extraversion      | .218         | .164  | .864                    | 1.157 |
|                |       | agreeable         | .130         | .096  | .772                    | 1.296 |
|                |       | conscientiousness | .115         | .085  | .848                    | 1.180 |
|                |       | neuroticism       | -.544        | -.477 | .764                    | 1.310 |
|                |       | openness          | -.032        | -.023 | .922                    | 1.085 |
|                | 2     | (Constant)        |              |       |                         |       |
|                |       | age               | -.019        | -.013 | .829                    | 1.206 |
|                |       | sex               | -.031        | -.021 | .852                    | 1.174 |
|                |       | extraversion      | .134         | .092  | .801                    | 1.249 |
|                |       | agreeable         | .081         | .056  | .701                    | 1.426 |
|                |       |                   |              |       |                         |       |

### Coefficients<sup>a</sup>

| Nation | Model             | Unstandardized Coefficients |            | Standardized Coefficients | t       |
|--------|-------------------|-----------------------------|------------|---------------------------|---------|
|        |                   | B                           | Std. Error | Beta                      |         |
|        | conscientiousness | .085                        | .030       | .084                      | 2.840   |
|        | neuroticism       | -.443                       | .032       | -.472                     | -14.015 |
|        | openness          | -.056                       | .032       | -.050                     | -1.748  |
|        | eudaimonism       | -.001                       | .004       | -.009                     | -.327   |
|        | inclusive         | .108                        | .019       | .166                      | 5.705   |
|        | externality       | -.095                       | .024       | -.146                     | -3.944  |
|        | fear              | -.109                       | .023       | -.176                     | -4.769  |
|        | transformative    | .040                        | .020       | .058                      | 1.951   |
|        | fragility         | -.015                       | .021       | -.023                     | -.725   |
|        | valuing           | .029                        | .029       | .033                      | 1.022   |
|        | inflexibility     | .060                        | .022       | .087                      | 2.720   |

### Coefficients<sup>a</sup>

| Nation | Model             | Sig. | 95.0% Confidence Interval for B |             | Correlations |
|--------|-------------------|------|---------------------------------|-------------|--------------|
|        |                   |      | Lower Bound                     | Upper Bound | Zero-order   |
|        | conscientiousness | .005 | .026                            | .144        | .326         |
|        | neuroticism       | .000 | -.505                           | -.381       | -.630        |
|        | openness          | .081 | -.119                           | .007        | .084         |
|        | eudaimonism       | .744 | -.010                           | .007        | .076         |
|        | inclusive         | .000 | .071                            | .146        | .217         |
|        | externality       | .000 | -.142                           | -.048       | -.376        |
|        | fear              | .000 | -.154                           | -.064       | -.430        |
|        | transformative    | .051 | .000                            | .080        | -.019        |
|        | fragility         | .469 | -.056                           | .026        | -.287        |
|        | valuing           | .307 | -.027                           | .086        | -.247        |
|        | inflexibility     | .007 | .017                            | .102        | -.028        |



### Coefficients<sup>a</sup>

| Nation | Model | Correlations      |       | Collinearity Statistics |      |       |
|--------|-------|-------------------|-------|-------------------------|------|-------|
|        |       | Partial           | Part  | Tolerance               | VIF  |       |
|        |       | conscientiousness | .111  | .076                    | .826 | 1.211 |
|        |       | neuroticism       | -.483 | -.377                   | .637 | 1.569 |
|        |       | openness          | -.069 | -.047                   | .876 | 1.142 |
|        |       | eudaimonism       | -.013 | -.009                   | .904 | 1.106 |
|        |       | inclusive         | .219  | .153                    | .856 | 1.168 |
|        |       | externality       | -.154 | -.106                   | .529 | 1.889 |
|        |       | fear              | -.185 | -.128                   | .530 | 1.888 |
|        |       | transformative    | .077  | .052                    | .807 | 1.238 |
|        |       | fragility         | -.029 | -.019                   | .746 | 1.341 |
|        |       | valuing           | .040  | .027                    | .676 | 1.480 |
|        |       | inflexibility     | .107  | .073                    | .713 | 1.402 |

a. Dependent Variable: positive\_affect

### Excluded Variables<sup>a</sup>

| Nation | Model |                | Beta In            | t      | Sig. | Partial Correlation | Collinearity |
|--------|-------|----------------|--------------------|--------|------|---------------------|--------------|
|        |       |                |                    |        |      |                     | Tolerance    |
| Korea  | 1     | eudaimonism    | -.058 <sup>b</sup> | -2.146 | .032 | -.063               | .956         |
|        |       | inclusive      | .175 <sup>b</sup>  | 6.631  | .000 | .190                | .961         |
|        |       | externality    | -.205 <sup>b</sup> | -7.620 | .000 | -.218               | .917         |
|        |       | fear           | -.166 <sup>b</sup> | -6.197 | .000 | -.178               | .937         |
|        |       | transformative | .088 <sup>b</sup>  | 3.308  | .001 | .096                | .972         |
|        |       | fragility      | -.138 <sup>b</sup> | -5.199 | .000 | -.150               | .966         |
|        |       | valuing        | -.044 <sup>b</sup> | -1.577 | .115 | -.046               | .906         |
|        |       | inflexibility  | -.043 <sup>b</sup> | -1.620 | .106 | -.047               | .973         |
| Canada | 1     | eudaimonism    | .008 <sup>c</sup>  | .272   | .785 | .011                | .925         |
|        |       | inclusive      | .169 <sup>c</sup>  | 5.826  | .000 | .223                | .936         |
|        |       | externality    | -.161 <sup>c</sup> | -5.205 | .000 | -.200               | .832         |
|        |       | fear           | -.185 <sup>c</sup> | -5.866 | .000 | -.224               | .790         |
|        |       | transformative | .017 <sup>c</sup>  | .584   | .559 | .023                | .948         |
|        |       | fragility      | -.081 <sup>c</sup> | -2.671 | .008 | -.104               | .889         |
|        |       | valuing        | -.002 <sup>c</sup> | -.051  | .959 | -.002               | .842         |
|        |       | inflexibility  | .004 <sup>c</sup>  | .136   | .892 | .005                | .918         |

### Excluded Variables<sup>a</sup>

| Nation | Model |                | Collinearity Statistics |                   |
|--------|-------|----------------|-------------------------|-------------------|
|        |       |                | VIF                     | Minimum Tolerance |
| Korea  | 1     | eudaimonism    | 1.045                   | .729              |
|        |       | inclusive      | 1.040                   | .725              |
|        |       | externality    | 1.090                   | .726              |
|        |       | fear           | 1.067                   | .725              |
|        |       | transformative | 1.029                   | .723              |
|        |       | fragility      | 1.035                   | .730              |
|        |       | valuing        | 1.104                   | .730              |
|        |       | inflexibility  | 1.028                   | .721              |
| Canada | 1     | eudaimonism    | 1.081                   | .754              |
|        |       | inclusive      | 1.068                   | .764              |
|        |       | externality    | 1.202                   | .735              |
|        |       | fear           | 1.266                   | .720              |
|        |       | transformative | 1.055                   | .759              |
|        |       | fragility      | 1.125                   | .722              |
|        |       | valuing        | 1.188                   | .693              |
|        |       | inflexibility  | 1.089                   | .744              |

a. Dependent Variable: positive\_affect

↳

b. Predictors in the Model: (Constant), openness, age, sex, extraversion, neuroticism, conscientiousness, agreeable

c. Predictors in the Model: (Constant), openness, sex, conscientiousness, extraversion, age, agreeable,

### Collinearity Diagnostics<sup>a</sup>

| Nation | Model | Dimension | Eigenvalue | Condition Index | Variance Proportions |     |     |
|--------|-------|-----------|------------|-----------------|----------------------|-----|-----|
|        |       |           |            |                 | (Constant)           | age | sex |
| Korea  | 1     | 1         | 7.661      | 1.000           | .00                  | .00 | .00 |
|        |       | 2         | .105       | 8.547           | .00                  | .22 | .46 |
|        |       | 3         | .080       | 9.769           | .00                  | .39 | .22 |
|        |       | 4         | .057       | 11.572          | .00                  | .00 | .24 |
|        |       | 5         | .040       | 13.817          | .00                  | .18 | .02 |
|        |       | 6         | .027       | 16.936          | .00                  | .08 | .01 |
|        |       | 7         | .022       | 18.558          | .00                  | .00 | .02 |
|        |       | 8         | .007       | 32.008          | .99                  | .12 | .03 |
|        | 2     | 1         | 15.013     | 1.000           | .00                  | .00 | .00 |
|        |       | 2         | .194       | 8.799           | .00                  | .01 | .01 |
|        |       | 3         | .132       | 10.681          | .00                  | .03 | .20 |
|        |       | 4         | .109       | 11.763          | .00                  | .02 | .02 |
|        |       | 5         | .095       | 12.593          | .00                  | .12 | .17 |
|        |       | 6         | .087       | 13.142          | .00                  | .05 | .23 |
|        |       | 7         | .075       | 14.174          | .00                  | .33 | .11 |
|        |       | 8         | .057       | 16.243          | .00                  | .15 | .02 |
|        | 9     | .054      | 16.706     | .00             | .06                  | .11 |     |
|        | 10    | .044      | 18.477     | .00             | .00                  | .00 |     |
|        | 11    | .041      | 19.092     | .00             | .05                  | .05 |     |
|        | 12    | .030      | 22.306     | .00             | .03                  | .00 |     |
|        | 13    | .026      | 23.802     | .00             | .09                  | .00 |     |
|        | 14    | .022      | 26.408     | .00             | .00                  | .01 |     |
|        | 15    | .017      | 29.438     | .00             | .02                  | .03 |     |
|        | 16    | .005      | 54.024     | .99             | .04                  | .04 |     |
| Canada | 1     | 1         | 7.555      | 1.000           | .00                  | .00 | .00 |
|        |       | 2         | .149       | 7.123           | .00                  | .05 | .04 |
|        |       | 3         | .095       | 8.928           | .00                  | .34 | .06 |
|        |       | 4         | .070       | 10.412          | .00                  | .01 | .51 |
|        |       | 5         | .055       | 11.677          | .00                  | .34 | .16 |
|        |       | 6         | .040       | 13.690          | .00                  | .04 | .01 |
|        |       | 7         | .028       | 16.433          | .00                  | .03 | .16 |
|        |       | 8         | .008       | 30.436          | 1.00                 | .20 | .05 |
|        | 2     | 1         | 14.609     | 1.000           | .00                  | .00 | .00 |
|        |       | 2         | .396       | 6.072           | .00                  | .00 | .00 |
|        |       | 3         | .173       | 9.178           | .00                  | .04 | .02 |
|        |       | 4         | .131       | 10.545          | .00                  | .07 | .00 |
|        |       | 5         | .107       | 11.702          | .00                  | .00 | .11 |

### Collinearity Diagnostics<sup>a</sup>

| Nation | Model | Dimension | Variance Proportions |           |                   |             |
|--------|-------|-----------|----------------------|-----------|-------------------|-------------|
|        |       |           | extraversion         | agreeable | conscientiousness | neuroticism |
| Korea  | 1     | 1         | .00                  | .00       | .00               | .00         |
|        |       | 2         | .00                  | .00       | .02               | .04         |
|        |       | 3         | .13                  | .03       | .00               | .00         |
|        |       | 4         | .09                  | .02       | .00               | .56         |
|        |       | 5         | .32                  | .01       | .20               | .08         |
|        |       | 6         | .00                  | .00       | .56               | .02         |
|        |       | 7         | .46                  | .83       | .05               | .01         |
|        |       | 8         | .00                  | .11       | .17               | .30         |
|        | 2     | 1         | .00                  | .00       | .00               | .00         |
|        |       | 2         | .01                  | .00       | .00               | .00         |
|        |       | 3         | .01                  | .01       | .00               | .02         |
|        |       | 4         | .00                  | .00       | .01               | .00         |
|        |       | 5         | .00                  | .00       | .01               | .01         |
|        |       | 6         | .06                  | .02       | .00               | .00         |
|        |       | 7         | .04                  | .00       | .00               | .00         |
|        |       | 8         | .12                  | .01       | .00               | .02         |
| Canada | 1     | 1         | .00                  | .00       | .00               | .00         |
|        |       | 2         | .16                  | .00       | .01               | .25         |
|        |       | 3         | .45                  | .00       | .02               | .00         |
|        |       | 4         | .21                  | .02       | .02               | .26         |
|        |       | 5         | .11                  | .01       | .16               | .02         |
|        |       | 6         | .03                  | .03       | .54               | .06         |
|        |       | 7         | .02                  | .92       | .02               | .02         |
|        |       | 8         | .03                  | .02       | .22               | .40         |
|        | 2     | 1         | .00                  | .00       | .00               | .00         |
|        |       | 2         | .03                  | .00       | .00               | .00         |
|        |       | 3         | .02                  | .00       | .00               | .05         |
|        |       | 4         | .01                  | .00       | .02               | .00         |
|        |       | 5         | .02                  | .00       | .00               | .10         |

### Collinearity Diagnostics<sup>a</sup>

| Nation | Model | Dimension | Variance Proportions |             |           |             |      |
|--------|-------|-----------|----------------------|-------------|-----------|-------------|------|
|        |       |           | openness             | eudaimonism | inclusive | externality | fear |
| Korea  | 1     | 1         | .00                  |             |           |             |      |
|        |       | 2         | .00                  |             |           |             |      |
|        |       | 3         | .02                  |             |           |             |      |
|        |       | 4         | .00                  |             |           |             |      |
|        |       | 5         | .22                  |             |           |             |      |
|        |       | 6         | .58                  |             |           |             |      |
|        |       | 7         | .03                  |             |           |             |      |
|        |       | 8         | .14                  |             |           |             |      |
|        | 2     | 1         | .00                  | .00         | .00       | .00         | .00  |
|        |       | 2         | .00                  | .04         | .07       | .10         | .14  |
|        |       | 3         | .00                  | .14         | .08       | .01         | .09  |
|        |       | 4         | .00                  | .21         | .68       | .00         | .01  |
|        |       | 5         | .00                  | .12         | .00       | .02         | .07  |
|        |       | 6         | .01                  | .22         | .01       | .07         | .03  |
|        |       | 7         | .01                  | .20         | .06       | .10         | .00  |
|        |       | 8         | .00                  | .01         | .00       | .03         | .23  |
| Canada | 1     | 1         | .00                  |             |           |             |      |
|        |       | 2         | .00                  |             |           |             |      |
|        |       | 3         | .00                  |             |           |             |      |
|        |       | 4         | .00                  |             |           |             |      |
|        |       | 5         | .23                  |             |           |             |      |
|        |       | 6         | .40                  |             |           |             |      |
|        |       | 7         | .18                  |             |           |             |      |
|        |       | 8         | .17                  |             |           |             |      |
|        | 2     | 1         | .00                  | .00         | .00       | .00         | .00  |
|        |       | 2         | .00                  | .01         | .01       | .04         | .12  |
|        |       | 3         | .00                  | .01         | .01       | .01         | .01  |
|        |       | 4         | .00                  | .01         | .65       | .00         | .00  |
|        |       | 5         | .00                  | .15         | .00       | .04         | .24  |

### Collinearity Diagnostics<sup>a</sup>

| Nation | Model | Dimension | Variance Proportions |           |         |               |     |
|--------|-------|-----------|----------------------|-----------|---------|---------------|-----|
|        |       |           | transformative       | fragility | valuing | inflexibility |     |
| Korea  | 1     | 1         |                      |           |         |               |     |
|        |       | 2         |                      |           |         |               |     |
|        |       | 3         |                      |           |         |               |     |
|        |       | 4         |                      |           |         |               |     |
|        |       | 5         |                      |           |         |               |     |
|        |       | 6         |                      |           |         |               |     |
|        |       | 7         |                      |           |         |               |     |
|        |       | 8         |                      |           |         |               |     |
|        | 2     | 1         |                      | .00       | .00     | .00           | .00 |
|        |       | 2         |                      | .00       | .00     | .00           | .01 |
|        |       | 3         |                      | .03       | .00     | .00           | .00 |
|        |       | 4         |                      | .00       | .00     | .00           | .00 |
|        |       | 5         |                      | .05       | .00     | .00           | .16 |
|        |       | 6         |                      | .06       | .01     | .00           | .03 |
|        |       | 7         |                      | .10       | .01     | .00           | .00 |
|        |       | 8         |                      | .12       | .08     | .00           | .22 |
| Canada | 1     | 1         |                      |           |         |               |     |
|        |       | 2         |                      |           |         |               |     |
|        |       | 3         |                      |           |         |               |     |
|        |       | 4         |                      |           |         |               |     |
|        |       | 5         |                      |           |         |               |     |
|        |       | 6         |                      |           |         |               |     |
|        |       | 7         |                      |           |         |               |     |
|        |       | 8         |                      |           |         |               |     |
|        | 2     | 1         |                      | .00       | .00     | .00           | .00 |
|        |       | 2         |                      | .00       | .00     | .00           | .02 |
|        |       | 3         |                      | .03       | .01     | .00           | .31 |
|        |       | 4         |                      | .00       | .01     | .00           | .00 |
|        |       | 5         |                      | .10       | .00     | .01           | .01 |

### Collinearity Diagnostics<sup>a</sup>

| Nation | Model | Dimension | Eigenvalue | Condition Index | Variance Proportions |     |     |
|--------|-------|-----------|------------|-----------------|----------------------|-----|-----|
|        |       |           |            |                 | (Constant)           | age | sex |
|        |       | 6         | .097       | 12.289          | .00                  | .00 | .00 |
|        |       | 7         | .086       | 13.039          | .00                  | .21 | .09 |
|        |       | 8         | .073       | 14.174          | .00                  | .01 | .07 |
|        |       | 9         | .070       | 14.491          | .00                  | .10 | .10 |
|        |       | 10        | .061       | 15.481          | .00                  | .00 | .33 |
|        |       | 11        | .051       | 16.871          | .00                  | .35 | .02 |
|        |       | 12        | .044       | 18.168          | .00                  | .00 | .03 |
|        |       | 13        | .038       | 19.549          | .00                  | .00 | .01 |
|        |       | 14        | .031       | 21.685          | .00                  | .01 | .03 |
|        |       | 15        | .026       | 23.599          | .00                  | .05 | .12 |
|        |       | 16        | .006       | 50.079          | 1.00                 | .15 | .06 |

### Collinearity Diagnostics<sup>a</sup>

| Nation | Model | Dimension | Variance Proportions |           |                   |             |
|--------|-------|-----------|----------------------|-----------|-------------------|-------------|
|        |       |           | extraversion         | agreeable | conscientiousness | neuroticism |
|        |       | 6         | .38                  | .00       | .00               | .00         |
|        |       | 7         | .13                  | .00       | .01               | .01         |
|        |       | 8         | .17                  | .00       | .00               | .06         |
|        |       | 9         | .06                  | .00       | .00               | .01         |
|        |       | 10        | .01                  | .01       | .00               | .19         |
|        |       | 11        | .04                  | .00       | .35               | .05         |
|        |       | 12        | .05                  | .01       | .00               | .08         |
|        |       | 13        | .00                  | .01       | .28               | .03         |
|        |       | 14        | .03                  | .00       | .10               | .27         |
|        |       | 15        | .03                  | .94       | .04               | .00         |
|        |       | 16        | .03                  | .02       | .20               | .14         |

### Collinearity Diagnostics<sup>a</sup>

| Nation | Model | Dimension | Variance Proportions |             |           |             |      |
|--------|-------|-----------|----------------------|-------------|-----------|-------------|------|
|        |       |           | openness             | eudaimonism | inclusive | externality | fear |
|        |       | 6         | .00                  | .40         | .01       | .01         | .08  |
|        |       | 7         | .00                  | .02         | .20       | .06         | .00  |
|        |       | 8         | .01                  | .17         | .00       | .06         | .02  |
|        |       | 9         | .00                  | .00         | .03       | .33         | .44  |
|        |       | 10        | .01                  | .00         | .00       | .36         | .05  |
|        |       | 11        | .08                  | .05         | .00       | .00         | .02  |
|        |       | 12        | .22                  | .12         | .02       | .03         | .00  |
|        |       | 13        | .39                  | .03         | .00       | .00         | .00  |
|        |       | 14        | .07                  | .00         | .07       | .05         | .00  |
|        |       | 15        | .10                  | .01         | .00       | .01         | .02  |
|        |       | 16        | .12                  | .03         | .00       | .00         | .00  |

### Collinearity Diagnostics<sup>a</sup>

| Nation | Model | Dimension | Variance Proportions |           |         |               |
|--------|-------|-----------|----------------------|-----------|---------|---------------|
|        |       |           | transformative       | fragility | valuing | inflexibility |
|        |       | 6         | .00                  | .00       | .00     | .06           |
|        |       | 7         | .00                  | .02       | .00     | .28           |
|        |       | 8         | .38                  | .03       | .00     | .08           |
|        |       | 9         | .16                  | .03       | .01     | .00           |
|        |       | 10        | .00                  | .06       | .02     | .14           |
|        |       | 11        | .08                  | .03       | .00     | .00           |
|        |       | 12        | .13                  | .55       | .00     | .00           |
|        |       | 13        | .05                  | .21       | .12     | .00           |
|        |       | 14        | .01                  | .02       | .75     | .00           |
|        |       | 15        | .03                  | .00       | .01     | .03           |
|        |       | 16        | .02                  | .02       | .06     | .06           |

a. Dependent Variable: positive\_affect

REGRESSION

/MISSING LISTWISE

/STATISTICS COEFF OUTS CI(95) R ANOVA COLLIN TOL CHANGE ZPP

/CRITERIA=PIN(.05) POUT(.10)

/NOORIGIN

/DEPENDENT materialism

/METHOD=ENTER age sex extraversion agreeable conscientiousnessneuroticis



m openness

/METHOD=ENTER eudaimonism inclusive externality fear transformative fragility valuing  
inflexibility.

## Regression

### Notes

|                        |                                |                                                                                                                                                                                                                                                                                                                                                                                                                |
|------------------------|--------------------------------|----------------------------------------------------------------------------------------------------------------------------------------------------------------------------------------------------------------------------------------------------------------------------------------------------------------------------------------------------------------------------------------------------------------|
| Output Created         |                                | 20-MAY-2019 12:23:46                                                                                                                                                                                                                                                                                                                                                                                           |
| Comments               |                                |                                                                                                                                                                                                                                                                                                                                                                                                                |
| Input                  | Data                           | C:\Users\1\Desktop\korea cnada study\merge korea canada\final.sav                                                                                                                                                                                                                                                                                                                                              |
|                        | Active Dataset                 | DataSet1                                                                                                                                                                                                                                                                                                                                                                                                       |
|                        | Filter                         | <none>                                                                                                                                                                                                                                                                                                                                                                                                         |
|                        | Weight                         | <none>                                                                                                                                                                                                                                                                                                                                                                                                         |
|                        | Split File                     | Nation                                                                                                                                                                                                                                                                                                                                                                                                         |
|                        | N of Rows in Working Data File | 1837                                                                                                                                                                                                                                                                                                                                                                                                           |
| Missing Value Handling | Definition of Missing          | User-defined missing values are treated as missing.                                                                                                                                                                                                                                                                                                                                                            |
|                        | Cases Used                     | Statistics are based on cases with no missing values for any variable used.                                                                                                                                                                                                                                                                                                                                    |
| Syntax                 |                                | REGRESSION<br>/MISSING LISTWISE<br>/STATISTICS COEFF<br>OUTS CI(95) R ANOVA<br>COLLIN TOL CHANGE<br>ZPP<br>/CRITERIA=PIN(.05)<br>POUT(.10)<br>/NOORIGIN<br>/DEPENDENT<br>materialism<br>/METHOD=ENTER age<br>sex extraversion<br>agreeable<br>conscientiousness<br>neuroticism openness<br>/METHOD=ENTER<br>eudaimonism inclusive<br>externality fear<br>transformative fragility<br>valuing<br>inflexibility. |
| Resources              | Processor Time                 | 00:00:00.02                                                                                                                                                                                                                                                                                                                                                                                                    |
|                        | Elapsed Time                   | 00:00:00.04                                                                                                                                                                                                                                                                                                                                                                                                    |

### Notes

|                                               |             |
|-----------------------------------------------|-------------|
| Memory Required                               | 21520 bytes |
| Additional Memory Required for Residual Plots | 0 bytes     |

### Variables Entered/Removed<sup>a</sup>

| Nation | Model | Variables Entered                                                                                         | Variables Removed | Method |
|--------|-------|-----------------------------------------------------------------------------------------------------------|-------------------|--------|
| Korea  | 1     | openness, age, sex, extraversion, neuroticism, conscientiousness, agreeable <sup>b</sup>                  | .                 | Enter  |
|        | 2     | inflexibility, transformative, inclusive, eudaimonism, fragility, valuing, fear, externality <sup>b</sup> | .                 | Enter  |
| Canada | 1     | openness, sex, conscientiousness, extraversion, age, agreeable, neuroticism <sup>b</sup>                  | .                 | Enter  |
|        | 2     | transformative, inclusive, eudaimonism, inflexibility, fragility, valuing, fear, externality <sup>b</sup> | .                 | Enter  |

a. Dependent Variable: materialism

b. All requested variables entered.

### Model Summary

| Nation | Model | R                 | R Square | Adjusted R Square | Std. Error of the Estimate | Change ...<br>R Square Change |
|--------|-------|-------------------|----------|-------------------|----------------------------|-------------------------------|
| Korea  | 1     | .337 <sup>a</sup> | .114     | .108              | .48796                     | .114                          |
|        | 2     | .546 <sup>b</sup> | .298     | .289              | .43590                     | .184                          |
| Canada | 1     | .395 <sup>c</sup> | .156     | .147              | .51570                     | .156                          |
|        | 2     | .530 <sup>d</sup> | .280     | .264              | .47915                     | .124                          |

### Model Summary

|        |       | Change Statistics |     |      |               |
|--------|-------|-------------------|-----|------|---------------|
| Nation | Model | F Change          | df1 | df2  | Sig. F Change |
| Korea  | 1     | 21.446            | 7   | 1169 | .000          |
|        | 2     | 37.992            | 8   | 1161 | .000          |
| Canada | 1     | 17.241            | 7   | 652  | .000          |
|        | 2     | 13.907            | 8   | 644  | .000          |

- a. Predictors: (Constant), openness, age, sex, extraversion, neuroticism, conscientiousness, agreeable
- b. Predictors: (Constant), openness, age, sex, extraversion, neuroticism, conscientiousness, agreeable, inflexibility, transformative, inclusive, eudaimonism, fragility, valuing, fear, externality
- c. Predictors: (Constant), openness, sex, conscientiousness, extraversion, age, agreeable, neuroticism
- d. Predictors: (Constant), openness, sex, conscientiousness, extraversion, age, agreeable, neuroticism, transformative, inclusive, eudaimonism, inflexibility, fragility, valuing, fear, externality

### ANOVA<sup>a</sup>

| Nation | Model |            | Sum of Squares | df   | Mean Square | F      | Sig.              |
|--------|-------|------------|----------------|------|-------------|--------|-------------------|
| Korea  | 1     | Regression | 35.745         | 7    | 5.106       | 21.446 | .000 <sup>b</sup> |
|        |       | Residual   | 278.348        | 1169 | .238        |        |                   |
|        |       | Total      | 314.093        | 1176 |             |        |                   |
|        | 2     | Regression | 93.494         | 15   | 6.233       | 32.804 | .000 <sup>c</sup> |
|        |       | Residual   | 220.598        | 1161 | .190        |        |                   |
|        |       | Total      | 314.093        | 1176 |             |        |                   |
| Canada | 1     | Regression | 32.096         | 7    | 4.585       | 17.241 | .000 <sup>d</sup> |
|        |       | Residual   | 173.399        | 652  | .266        |        |                   |
|        |       | Total      | 205.495        | 659  |             |        |                   |
|        | 2     | Regression | 57.640         | 15   | 3.843       | 16.737 | .000 <sup>e</sup> |
|        |       | Residual   | 147.855        | 644  | .230        |        |                   |
|        |       | Total      | 205.495        | 659  |             |        |                   |

a. Dependent Variable: materialism

b. Predictors: (Constant), openness, age, sex, extraversion, neuroticism, conscientiousness, agreeable

c. Predictors: (Constant), openness, age, sex, extraversion, neuroticism, conscientiousness, agreeable, inflexibility, transformative, inclusive, eudaimonism, fragility, valuing, fear, externality

d. Predictors: (Constant), openness, sex, conscientiousness, extraversion, age, agreeable, neuroticism

e. Predictors: (Constant), openness, sex, conscientiousness, extraversion, age, agreeable, neuroticism, transformative, inclusive, eudaimonism, inflexibility, fragility, valuing, fear, externality

### Coefficients<sup>a</sup>

| Nation         | Model |                   | Unstandardized Coefficients |            | Standardized Coefficients | t      |
|----------------|-------|-------------------|-----------------------------|------------|---------------------------|--------|
|                |       |                   | B                           | Std. Error | Beta                      |        |
| Korea          | 1     | (Constant)        | 3.126                       | .151       |                           | 20.723 |
|                |       | age               | -.010                       | .001       | -.229                     | -7.971 |
|                |       | sex               | -.019                       | .029       | -.018                     | -.640  |
|                |       | extraversion      | .032                        | .023       | .045                      | 1.402  |
|                |       | agreeable         | -.005                       | .026       | -.007                     | -.210  |
|                |       | conscientiousness | .048                        | .022       | .065                      | 2.214  |
|                |       | neuroticism       | .171                        | .022       | .226                      | 7.798  |
|                |       | openness          | -.025                       | .023       | -.031                     | -1.089 |
|                | 2     | (Constant)        | 2.105                       | .168       |                           | 12.520 |
|                |       | age               | -.010                       | .001       | -.236                     | -8.943 |
|                |       | sex               | .023                        | .027       | .023                      | .878   |
|                |       | extraversion      | .038                        | .021       | .053                      | 1.832  |
|                |       | agreeable         | -.002                       | .024       | -.003                     | -.104  |
|                |       | conscientiousness | .037                        | .020       | .050                      | 1.871  |
|                |       | neuroticism       | .060                        | .021       | .079                      | 2.845  |
|                |       | openness          | -.008                       | .020       | -.010                     | -.400  |
|                |       | eudaimonism       | -.011                       | .003       | -.111                     | -4.313 |
|                |       | inclusive         | -.005                       | .012       | -.010                     | -.381  |
|                |       | externality       | .077                        | .015       | .158                      | 5.194  |
|                |       | fear              | -.037                       | .015       | -.077                     | -2.545 |
| transformative | -.024 | .013              | -.054                       | -1.887     |                           |        |
| fragility      | .023  | .013              | .047                        | 1.760      |                           |        |
| valuing        | .267  | .020              | .369                        | 13.433     |                           |        |
| inflexibility  | .008  | .013              | .017                        | .621       |                           |        |
| Canada         | 1     | (Constant)        | 3.247                       | .205       |                           | 15.878 |
|                |       | age               | -.011                       | .001       | -.301                     | -7.772 |
|                |       | sex               | -.023                       | .044       | -.020                     | -.523  |
|                |       | extraversion      | .037                        | .022       | .066                      | 1.699  |
|                |       | agreeable         | -.077                       | .028       | -.112                     | -2.745 |
|                |       | conscientiousness | -.011                       | .026       | -.017                     | -.434  |
|                |       | neuroticism       | .072                        | .025       | .118                      | 2.862  |
|                |       | openness          | -.055                       | .027       | -.076                     | -2.035 |
|                | 2     | (Constant)        | 2.205                       | .232       |                           | 9.498  |
|                |       | age               | -.010                       | .001       | -.291                     | -7.933 |
|                |       | sex               | .012                        | .042       | .010                      | .284   |
|                |       | extraversion      | .039                        | .021       | .068                      | 1.820  |
|                |       | agreeable         | -.051                       | .027       | -.074                     | -1.862 |

### Coefficients<sup>a</sup>

| Nation         | Model |                   | Sig. | 95.0% Confidence Interval for B |             | Correlations<br>Zero-order |
|----------------|-------|-------------------|------|---------------------------------|-------------|----------------------------|
|                |       |                   |      | Lower Bound                     | Upper Bound |                            |
| Korea          | 1     | (Constant)        | .000 | 2.830                           | 3.422       |                            |
|                |       | age               | .000 | -.012                           | -.007       | -.253                      |
|                |       | sex               | .523 | -.076                           | .039        | .040                       |
|                |       | extraversion      | .161 | -.013                           | .078        | .047                       |
|                |       | agreeable         | .834 | -.057                           | .046        | .023                       |
|                |       | conscientiousness | .027 | .006                            | .091        | -.032                      |
|                |       | neuroticism       | .000 | .128                            | .214        | .250                       |
|                |       | openness          | .276 | -.069                           | .020        | -.011                      |
|                | 2     | (Constant)        | .000 | 1.775                           | 2.435       |                            |
|                |       | age               | .000 | -.012                           | -.008       | -.253                      |
|                |       | sex               | .380 | -.029                           | .076        | .040                       |
|                |       | extraversion      | .067 | -.003                           | .079        | .047                       |
|                |       | agreeable         | .917 | -.049                           | .044        | .023                       |
|                |       | conscientiousness | .062 | -.002                           | .075        | -.032                      |
|                |       | neuroticism       | .005 | .019                            | .101        | .250                       |
|                |       | openness          | .690 | -.048                           | .032        | -.011                      |
|                |       | eudaimonism       | .000 | -.016                           | -.006       | -.198                      |
|                |       | inclusive         | .703 | -.028                           | .019        | -.057                      |
|                |       | externality       | .000 | .048                            | .106        | .270                       |
|                |       | fear              | .011 | -.066                           | -.009       | .082                       |
| transformative | .059  | -.050             | .001 | -.034                           |             |                            |
| fragility      | .079  | -.003             | .049 | .131                            |             |                            |
| valuing        | .000  | .228              | .306 | .402                            |             |                            |
| inflexibility  | .535  | -.017             | .033 | .092                            |             |                            |
| Canada         | 1     | (Constant)        | .000 | 2.846                           | 3.649       |                            |
|                |       | age               | .000 | -.013                           | -.008       | -.343                      |
|                |       | sex               | .601 | -.110                           | .064        | .023                       |
|                |       | extraversion      | .090 | -.006                           | .081        | -.041                      |
|                |       | agreeable         | .006 | -.132                           | -.022       | -.182                      |
|                |       | conscientiousness | .664 | -.062                           | .039        | -.131                      |
|                |       | neuroticism       | .004 | .022                            | .121        | .223                       |
|                |       | openness          | .042 | -.108                           | -.002       | -.092                      |
|                | 2     | (Constant)        | .000 | 1.749                           | 2.661       |                            |
|                |       | age               | .000 | -.013                           | -.008       | -.343                      |
|                |       | sex               | .776 | -.070                           | .094        | .023                       |
|                |       | extraversion      | .069 | -.003                           | .081        | -.041                      |
|                |       | agreeable         | .063 | -.105                           | .003        | -.182                      |
|                |       |                   |      |                                 |             |                            |

### Coefficients<sup>a</sup>

| Nation         | Model |                   | Correlations |       | Collinearity Statistics |       |
|----------------|-------|-------------------|--------------|-------|-------------------------|-------|
|                |       |                   | Partial      | Part  | Tolerance               | VIF   |
| Korea          | 1     | (Constant)        |              |       |                         |       |
|                |       | age               | -.227        | -.219 | .920                    | 1.086 |
|                |       | sex               | -.019        | -.018 | .941                    | 1.063 |
|                |       | extraversion      | .041         | .039  | .739                    | 1.354 |
|                |       | agreeable         | -.006        | -.006 | .730                    | 1.370 |
|                |       | conscientiousness | .065         | .061  | .876                    | 1.142 |
|                |       | neuroticism       | .222         | .215  | .903                    | 1.108 |
|                |       | openness          | -.032        | -.030 | .908                    | 1.101 |
|                | 2     | (Constant)        |              |       |                         |       |
|                |       | age               | -.254        | -.220 | .871                    | 1.148 |
|                |       | sex               | .026         | .022  | .908                    | 1.101 |
|                |       | extraversion      | .054         | .045  | .729                    | 1.372 |
|                |       | agreeable         | -.003        | -.003 | .702                    | 1.424 |
|                |       | conscientiousness | .055         | .046  | .861                    | 1.161 |
|                |       | neuroticism       | .083         | .070  | .789                    | 1.267 |
|                |       | openness          | -.012        | -.010 | .894                    | 1.118 |
|                |       | eudaimonism       | -.126        | -.106 | .917                    | 1.090 |
|                |       | inclusive         | -.011        | -.009 | .911                    | 1.097 |
|                |       | externality       | .151         | .128  | .655                    | 1.526 |
|                |       | fear              | -.074        | -.063 | .656                    | 1.526 |
| transformative | -.055 | -.046             | .742         | 1.347 |                         |       |
| fragility      | .052  | .043              | .845         | 1.183 |                         |       |
| valuing        | .367  | .330              | .803         | 1.246 |                         |       |
| inflexibility  | .018  | .015              | .853         | 1.172 |                         |       |
| Canada         | 1     | (Constant)        |              |       |                         |       |
|                |       | age               | -.291        | -.280 | .862                    | 1.159 |
|                |       | sex               | -.020        | -.019 | .876                    | 1.142 |
|                |       | extraversion      | .066         | .061  | .864                    | 1.157 |
|                |       | agreeable         | -.107        | -.099 | .772                    | 1.296 |
|                |       | conscientiousness | -.017        | -.016 | .848                    | 1.180 |
|                |       | neuroticism       | .111         | .103  | .764                    | 1.310 |
|                |       | openness          | -.079        | -.073 | .922                    | 1.085 |
|                | 2     | (Constant)        |              |       |                         |       |
|                |       | age               | -.298        | -.265 | .829                    | 1.206 |
|                |       | sex               | .011         | .009  | .852                    | 1.174 |
|                |       | extraversion      | .072         | .061  | .801                    | 1.249 |
|                |       | agreeable         | -.073        | -.062 | .701                    | 1.426 |
|                |       |                   |              |       |                         |       |

### Coefficients<sup>a</sup>

| Nation | Model             | Unstandardized Coefficients |            | Standardized Coefficients | t      |
|--------|-------------------|-----------------------------|------------|---------------------------|--------|
|        |                   | B                           | Std. Error | Beta                      |        |
|        | conscientiousness | .009                        | .024       | .014                      | .379   |
|        | neuroticism       | -.006                       | .025       | -.009                     | -.222  |
|        | openness          | -.027                       | .026       | -.038                     | -1.051 |
|        | eudaimonism       | -.007                       | .004       | -.072                     | -2.051 |
|        | inclusive         | .010                        | .015       | .023                      | .642   |
|        | externality       | .030                        | .019       | .072                      | 1.566  |
|        | fear              | -.004                       | .018       | -.010                     | -.225  |
|        | transformative    | .007                        | .016       | .015                      | .400   |
|        | fragility         | .027                        | .017       | .062                      | 1.614  |
|        | valuing           | .166                        | .023       | .292                      | 7.187  |
|        | inflexibility     | .027                        | .018       | .061                      | 1.554  |

### Coefficients<sup>a</sup>

| Nation | Model             | Sig. | 95.0% Confidence Interval for B |             | Correlations |
|--------|-------------------|------|---------------------------------|-------------|--------------|
|        |                   |      | Lower Bound                     | Upper Bound | Zero-order   |
|        | conscientiousness | .705 | -.038                           | .057        | -.131        |
|        | neuroticism       | .824 | -.056                           | .044        | .223         |
|        | openness          | .294 | -.078                           | .023        | -.092        |
|        | eudaimonism       | .041 | -.015                           | .000        | -.120        |
|        | inclusive         | .521 | -.020                           | .040        | .080         |
|        | externality       | .118 | -.008                           | .068        | .251         |
|        | fear              | .822 | -.040                           | .032        | .233         |
|        | transformative    | .689 | -.026                           | .039        | .110         |
|        | fragility         | .107 | -.006                           | .059        | .199         |
|        | valuing           | .000 | .121                            | .211        | .414         |
|        | inflexibility     | .121 | -.007                           | .062        | .143         |



### Coefficients<sup>a</sup>

| Nation | Model |                   | Correlations |       | Collinearity Statistics |       |
|--------|-------|-------------------|--------------|-------|-------------------------|-------|
|        |       |                   | Partial      | Part  | Tolerance               | VIF   |
|        |       | conscientiousness | .015         | .013  | .826                    | 1.211 |
|        |       | neuroticism       | -.009        | -.007 | .637                    | 1.569 |
|        |       | openness          | -.041        | -.035 | .876                    | 1.142 |
|        |       | eudaimonism       | -.081        | -.069 | .904                    | 1.106 |
|        |       | inclusive         | .025         | .021  | .856                    | 1.168 |
|        |       | externality       | .062         | .052  | .529                    | 1.889 |
|        |       | fear              | -.009        | -.008 | .530                    | 1.888 |
|        |       | transformative    | .016         | .013  | .807                    | 1.238 |
|        |       | fragility         | .063         | .054  | .746                    | 1.341 |
|        |       | valuing           | .273         | .240  | .676                    | 1.480 |
|        |       | inflexibility     | .061         | .052  | .713                    | 1.402 |

a. Dependent Variable: materialism

### Excluded Variables<sup>a</sup>

| Nation | Model |                | Beta In            | t      | Sig. | Partial Correlation | Collinearity |
|--------|-------|----------------|--------------------|--------|------|---------------------|--------------|
|        |       |                |                    |        |      |                     | Tolerance    |
| Korea  | 1     | eudaimonism    | -.150 <sup>b</sup> | -5.380 | .000 | -.156               | .956         |
|        |       | inclusive      | -.012 <sup>b</sup> | -.436  | .663 | -.013               | .961         |
|        |       | externality    | .232 <sup>b</sup>  | 8.312  | .000 | .236                | .917         |
|        |       | fear           | .061 <sup>b</sup>  | 2.130  | .033 | .062                | .937         |
|        |       | transformative | -.022 <sup>b</sup> | -.800  | .424 | -.023               | .972         |
|        |       | fragility      | .091 <sup>b</sup>  | 3.279  | .001 | .096                | .966         |
|        |       | valuing        | .393 <sup>b</sup>  | 14.821 | .000 | .398                | .906         |
|        |       | inflexibility  | .115 <sup>b</sup>  | 4.140  | .000 | .120                | .973         |
| Canada | 1     | eudaimonism    | -.089 <sup>c</sup> | -2.389 | .017 | -.093               | .925         |
|        |       | inclusive      | .100 <sup>c</sup>  | 2.709  | .007 | .106                | .936         |
|        |       | externality    | .220 <sup>c</sup>  | 5.707  | .000 | .218                | .832         |
|        |       | fear           | .156 <sup>c</sup>  | 3.897  | .000 | .151                | .790         |
|        |       | transformative | .072 <sup>c</sup>  | 1.953  | .051 | .076                | .948         |
|        |       | fragility      | .150 <sup>c</sup>  | 3.964  | .000 | .154                | .889         |
|        |       | valuing        | .352 <sup>c</sup>  | 9.588  | .000 | .352                | .842         |
|        |       | inflexibility  | .147 <sup>c</sup>  | 3.971  | .000 | .154                | .918         |

## Excluded Variables<sup>a</sup>

| Nation | Model |                | Collinearity Statistics |                   |
|--------|-------|----------------|-------------------------|-------------------|
|        |       |                | VIF                     | Minimum Tolerance |
| Korea  | 1     | eudaimonism    | 1.045                   | .729              |
|        |       | inclusive      | 1.040                   | .725              |
|        |       | externality    | 1.090                   | .726              |
|        |       | fear           | 1.067                   | .725              |
|        |       | transformative | 1.029                   | .723              |
|        |       | fragility      | 1.035                   | .730              |
|        |       | valuing        | 1.104                   | .730              |
|        |       | inflexibility  | 1.028                   | .721              |
| Canada | 1     | eudaimonism    | 1.081                   | .754              |
|        |       | inclusive      | 1.068                   | .764              |
|        |       | externality    | 1.202                   | .735              |
|        |       | fear           | 1.266                   | .720              |
|        |       | transformative | 1.055                   | .759              |
|        |       | fragility      | 1.125                   | .722              |
|        |       | valuing        | 1.188                   | .693              |
|        |       | inflexibility  | 1.089                   | .744              |

a. Dependent Variable: materialism

↳

b. Predictors in the Model: (Constant), openness, age, sex, extraversion, neuroticism, conscientiousness, agreeable

c. Predictors in the Model: (Constant), openness, sex, conscientiousness, extraversion, age, agreeable,

### Collinearity Diagnostics<sup>a</sup>

| Nation | Model | Dimension | Eigenvalue | Condition Index | Variance Proportions |     |     |
|--------|-------|-----------|------------|-----------------|----------------------|-----|-----|
|        |       |           |            |                 | (Constant)           | age | sex |
| Korea  | 1     | 1         | 7.661      | 1.000           | .00                  | .00 | .00 |
|        |       | 2         | .105       | 8.547           | .00                  | .22 | .46 |
|        |       | 3         | .080       | 9.769           | .00                  | .39 | .22 |
|        |       | 4         | .057       | 11.572          | .00                  | .00 | .24 |
|        |       | 5         | .040       | 13.817          | .00                  | .18 | .02 |
|        |       | 6         | .027       | 16.936          | .00                  | .08 | .01 |
|        |       | 7         | .022       | 18.558          | .00                  | .00 | .02 |
|        |       | 8         | .007       | 32.008          | .99                  | .12 | .03 |
|        | 2     | 1         | 15.013     | 1.000           | .00                  | .00 | .00 |
|        |       | 2         | .194       | 8.799           | .00                  | .01 | .01 |
|        |       | 3         | .132       | 10.681          | .00                  | .03 | .20 |
|        |       | 4         | .109       | 11.763          | .00                  | .02 | .02 |
|        |       | 5         | .095       | 12.593          | .00                  | .12 | .17 |
|        |       | 6         | .087       | 13.142          | .00                  | .05 | .23 |
|        |       | 7         | .075       | 14.174          | .00                  | .33 | .11 |
|        |       | 8         | .057       | 16.243          | .00                  | .15 | .02 |
|        | 9     | .054      | 16.706     | .00             | .06                  | .11 |     |
|        | 10    | .044      | 18.477     | .00             | .00                  | .00 |     |
|        | 11    | .041      | 19.092     | .00             | .05                  | .05 |     |
|        | 12    | .030      | 22.306     | .00             | .03                  | .00 |     |
|        | 13    | .026      | 23.802     | .00             | .09                  | .00 |     |
|        | 14    | .022      | 26.408     | .00             | .00                  | .01 |     |
|        | 15    | .017      | 29.438     | .00             | .02                  | .03 |     |
|        | 16    | .005      | 54.024     | .99             | .04                  | .04 |     |
| Canada | 1     | 1         | 7.555      | 1.000           | .00                  | .00 | .00 |
|        |       | 2         | .149       | 7.123           | .00                  | .05 | .04 |
|        |       | 3         | .095       | 8.928           | .00                  | .34 | .06 |
|        |       | 4         | .070       | 10.412          | .00                  | .01 | .51 |
|        |       | 5         | .055       | 11.677          | .00                  | .34 | .16 |
|        |       | 6         | .040       | 13.690          | .00                  | .04 | .01 |
|        |       | 7         | .028       | 16.433          | .00                  | .03 | .16 |
|        |       | 8         | .008       | 30.436          | 1.00                 | .20 | .05 |
|        | 2     | 1         | 14.609     | 1.000           | .00                  | .00 | .00 |
|        |       | 2         | .396       | 6.072           | .00                  | .00 | .00 |
|        |       | 3         | .173       | 9.178           | .00                  | .04 | .02 |
|        |       | 4         | .131       | 10.545          | .00                  | .07 | .00 |
|        |       | 5         | .107       | 11.702          | .00                  | .00 | .11 |

### Collinearity Diagnostics<sup>a</sup>

| Nation | Model | Dimension | Variance Proportions |           |                   |             |
|--------|-------|-----------|----------------------|-----------|-------------------|-------------|
|        |       |           | extraversion         | agreeable | conscientiousness | neuroticism |
| Korea  | 1     | 1         | .00                  | .00       | .00               | .00         |
|        |       | 2         | .00                  | .00       | .02               | .04         |
|        |       | 3         | .13                  | .03       | .00               | .00         |
|        |       | 4         | .09                  | .02       | .00               | .56         |
|        |       | 5         | .32                  | .01       | .20               | .08         |
|        |       | 6         | .00                  | .00       | .56               | .02         |
|        |       | 7         | .46                  | .83       | .05               | .01         |
|        |       | 8         | .00                  | .11       | .17               | .30         |
|        | 2     | 1         | .00                  | .00       | .00               | .00         |
|        |       | 2         | .01                  | .00       | .00               | .00         |
|        |       | 3         | .01                  | .01       | .00               | .02         |
|        |       | 4         | .00                  | .00       | .01               | .00         |
|        |       | 5         | .00                  | .00       | .01               | .01         |
|        |       | 6         | .06                  | .02       | .00               | .00         |
|        |       | 7         | .04                  | .00       | .00               | .00         |
|        |       | 8         | .12                  | .01       | .00               | .02         |
| Canada | 1     | 1         | .00                  | .00       | .00               | .00         |
|        |       | 2         | .16                  | .00       | .01               | .25         |
|        |       | 3         | .45                  | .00       | .02               | .00         |
|        |       | 4         | .21                  | .02       | .02               | .26         |
|        |       | 5         | .11                  | .01       | .16               | .02         |
|        |       | 6         | .03                  | .03       | .54               | .06         |
|        |       | 7         | .02                  | .92       | .02               | .02         |
|        |       | 8         | .03                  | .02       | .22               | .40         |
|        | 2     | 1         | .00                  | .00       | .00               | .00         |
|        |       | 2         | .03                  | .00       | .00               | .00         |
|        |       | 3         | .02                  | .00       | .00               | .05         |
|        |       | 4         | .01                  | .00       | .02               | .00         |
|        |       | 5         | .02                  | .00       | .00               | .10         |

### Collinearity Diagnostics<sup>a</sup>

| Nation | Model | Dimension | Variance Proportions |             |           |             |      |
|--------|-------|-----------|----------------------|-------------|-----------|-------------|------|
|        |       |           | openness             | eudaimonism | inclusive | externality | fear |
| Korea  | 1     | 1         | .00                  |             |           |             |      |
|        |       | 2         | .00                  |             |           |             |      |
|        |       | 3         | .02                  |             |           |             |      |
|        |       | 4         | .00                  |             |           |             |      |
|        |       | 5         | .22                  |             |           |             |      |
|        |       | 6         | .58                  |             |           |             |      |
|        |       | 7         | .03                  |             |           |             |      |
|        |       | 8         | .14                  |             |           |             |      |
|        | 2     | 1         | .00                  | .00         | .00       | .00         | .00  |
|        |       | 2         | .00                  | .04         | .07       | .10         | .14  |
|        |       | 3         | .00                  | .14         | .08       | .01         | .09  |
|        |       | 4         | .00                  | .21         | .68       | .00         | .01  |
|        |       | 5         | .00                  | .12         | .00       | .02         | .07  |
|        |       | 6         | .01                  | .22         | .01       | .07         | .03  |
|        |       | 7         | .01                  | .20         | .06       | .10         | .00  |
|        |       | 8         | .00                  | .01         | .00       | .03         | .23  |
| Canada | 1     | 9         | .00                  | .00         | .02       | .10         | .11  |
|        |       | 10        | .02                  | .00         | .00       | .49         | .22  |
|        |       | 11        | .14                  | .01         | .00       | .00         | .07  |
|        |       | 12        | .11                  | .01         | .02       | .02         | .00  |
|        |       | 13        | .58                  | .00         | .00       | .03         | .01  |
|        |       | 14        | .03                  | .00         | .01       | .01         | .01  |
|        |       | 15        | .00                  | .00         | .02       | .01         | .01  |
|        |       | 16        | .08                  | .03         | .01       | .00         | .00  |
|        | 2     | 1         | .00                  | .00         | .00       | .00         | .00  |
|        |       | 2         | .00                  | .01         | .01       | .04         | .12  |
|        |       | 3         | .00                  | .01         | .01       | .01         | .01  |
|        |       | 4         | .00                  | .01         | .65       | .00         | .00  |
|        |       | 5         | .00                  | .15         | .00       | .04         | .24  |

### Collinearity Diagnostics<sup>a</sup>

| Nation | Model | Dimension | Variance Proportions |           |         |               |     |
|--------|-------|-----------|----------------------|-----------|---------|---------------|-----|
|        |       |           | transformative       | fragility | valuing | inflexibility |     |
| Korea  | 1     | 1         |                      |           |         |               |     |
|        |       | 2         |                      |           |         |               |     |
|        |       | 3         |                      |           |         |               |     |
|        |       | 4         |                      |           |         |               |     |
|        |       | 5         |                      |           |         |               |     |
|        |       | 6         |                      |           |         |               |     |
|        |       | 7         |                      |           |         |               |     |
|        |       | 8         |                      |           |         |               |     |
|        | 2     | 1         |                      | .00       | .00     | .00           | .00 |
|        |       | 2         |                      | .00       | .00     | .00           | .01 |
|        |       | 3         |                      | .03       | .00     | .00           | .00 |
|        |       | 4         |                      | .00       | .00     | .00           | .00 |
|        |       | 5         |                      | .05       | .00     | .00           | .16 |
|        |       | 6         |                      | .06       | .01     | .00           | .03 |
|        |       | 7         |                      | .10       | .01     | .00           | .00 |
|        |       | 8         |                      | .12       | .08     | .00           | .22 |
|        | 9     |           | .02                  | .04       | .01     | .39           |     |
|        | 10    |           | .25                  | .01       | .00     | .05           |     |
|        | 11    |           | .12                  | .10       | .00     | .03           |     |
|        | 12    |           | .19                  | .63       | .00     | .01           |     |
|        | 13    |           | .03                  | .00       | .02     | .00           |     |
|        | 14    |           | .02                  | .02       | .01     | .00           |     |
|        | 15    |           | .00                  | .03       | .84     | .02           |     |
|        | 16    |           | .00                  | .05       | .11     | .07           |     |
| Canada | 1     | 1         |                      |           |         |               |     |
|        |       | 2         |                      |           |         |               |     |
|        |       | 3         |                      |           |         |               |     |
|        |       | 4         |                      |           |         |               |     |
|        |       | 5         |                      |           |         |               |     |
|        |       | 6         |                      |           |         |               |     |
|        |       | 7         |                      |           |         |               |     |
|        |       | 8         |                      |           |         |               |     |
|        | 2     | 1         |                      | .00       | .00     | .00           | .00 |
|        |       | 2         |                      | .00       | .00     | .00           | .02 |
|        |       | 3         |                      | .03       | .01     | .00           | .31 |
|        |       | 4         |                      | .00       | .01     | .00           | .00 |
|        |       | 5         |                      | .10       | .00     | .01           | .01 |

### Collinearity Diagnostics<sup>a</sup>

| Nation | Model | Dimension | Eigenvalue | Condition Index | Variance Proportions |     |     |
|--------|-------|-----------|------------|-----------------|----------------------|-----|-----|
|        |       |           |            |                 | (Constant)           | age | sex |
|        |       | 6         | .097       | 12.289          | .00                  | .00 | .00 |
|        |       | 7         | .086       | 13.039          | .00                  | .21 | .09 |
|        |       | 8         | .073       | 14.174          | .00                  | .01 | .07 |
|        |       | 9         | .070       | 14.491          | .00                  | .10 | .10 |
|        |       | 10        | .061       | 15.481          | .00                  | .00 | .33 |
|        |       | 11        | .051       | 16.871          | .00                  | .35 | .02 |
|        |       | 12        | .044       | 18.168          | .00                  | .00 | .03 |
|        |       | 13        | .038       | 19.549          | .00                  | .00 | .01 |
|        |       | 14        | .031       | 21.685          | .00                  | .01 | .03 |
|        |       | 15        | .026       | 23.599          | .00                  | .05 | .12 |
|        |       | 16        | .006       | 50.079          | 1.00                 | .15 | .06 |

### Collinearity Diagnostics<sup>a</sup>

| Nation | Model | Dimension | Variance Proportions |           |                   |             |
|--------|-------|-----------|----------------------|-----------|-------------------|-------------|
|        |       |           | extraversion         | agreeable | conscientiousness | neuroticism |
|        |       | 6         | .38                  | .00       | .00               | .00         |
|        |       | 7         | .13                  | .00       | .01               | .01         |
|        |       | 8         | .17                  | .00       | .00               | .06         |
|        |       | 9         | .06                  | .00       | .00               | .01         |
|        |       | 10        | .01                  | .01       | .00               | .19         |
|        |       | 11        | .04                  | .00       | .35               | .05         |
|        |       | 12        | .05                  | .01       | .00               | .08         |
|        |       | 13        | .00                  | .01       | .28               | .03         |
|        |       | 14        | .03                  | .00       | .10               | .27         |
|        |       | 15        | .03                  | .94       | .04               | .00         |
|        |       | 16        | .03                  | .02       | .20               | .14         |

### Collinearity Diagnostics<sup>a</sup>

| Nation | Model | Dimension | Variance Proportions |             |           |             |      |
|--------|-------|-----------|----------------------|-------------|-----------|-------------|------|
|        |       |           | openness             | eudaimonism | inclusive | externality | fear |
|        |       | 6         | .00                  | .40         | .01       | .01         | .08  |
|        |       | 7         | .00                  | .02         | .20       | .06         | .00  |
|        |       | 8         | .01                  | .17         | .00       | .06         | .02  |
|        |       | 9         | .00                  | .00         | .03       | .33         | .44  |
|        |       | 10        | .01                  | .00         | .00       | .36         | .05  |
|        |       | 11        | .08                  | .05         | .00       | .00         | .02  |
|        |       | 12        | .22                  | .12         | .02       | .03         | .00  |
|        |       | 13        | .39                  | .03         | .00       | .00         | .00  |
|        |       | 14        | .07                  | .00         | .07       | .05         | .00  |
|        |       | 15        | .10                  | .01         | .00       | .01         | .02  |
|        |       | 16        | .12                  | .03         | .00       | .00         | .00  |

### Collinearity Diagnostics<sup>a</sup>

| Nation | Model | Dimension | Variance Proportions |           |         |               |
|--------|-------|-----------|----------------------|-----------|---------|---------------|
|        |       |           | transformative       | fragility | valuing | inflexibility |
|        |       | 6         | .00                  | .00       | .00     | .06           |
|        |       | 7         | .00                  | .02       | .00     | .28           |
|        |       | 8         | .38                  | .03       | .00     | .08           |
|        |       | 9         | .16                  | .03       | .01     | .00           |
|        |       | 10        | .00                  | .06       | .02     | .14           |
|        |       | 11        | .08                  | .03       | .00     | .00           |
|        |       | 12        | .13                  | .55       | .00     | .00           |
|        |       | 13        | .05                  | .21       | .12     | .00           |
|        |       | 14        | .01                  | .02       | .75     | .00           |
|        |       | 15        | .03                  | .00       | .01     | .03           |
|        |       | 16        | .02                  | .02       | .06     | .06           |

a. Dependent Variable: materialism
